# Supplementary material for: Intracranial aneurysms: in vitro study of “intracranial” pressure and parent vessel curvature as potential modifiers of aneurysm pulsation amplitude
Source: Research Square preprint supplement (doi:10.21203/rs.3.rs-8211535/v1), 2026-02-20
Supplement: Supplementary file 1 [file 0f19f0fe380e7fae4a279129.xlsx]

## Sheet: Sheet1
Order	Each CT scanner reconstructed volume in chronologic order (each "frame" is 50ms)
Volume	Aneurysm model volume in mm3
Surface	Aneurysm wall surface in mm²
Naming convention	…-XXX-YY - XXX = external pressure in the chamber in mmHg - YY = pulse pump voltage, value should be divided by 10 (e.g. 10 = 1.0V)

## Sheet: EXP3-00-000
Order	Volume mm3	Surface mm2
PCT_DYNMULTI_0_6_H40F_1_0002	525.894	267.773
PCT_DYNMULTI_0_6_H40F_2_0003	525.916	267.77
PCT_DYNMULTI_0_6_H40F_3_0004	525.815	267.682
PCT_DYNMULTI_0_6_H40F_4_0005	525.793	267.637
PCT_DYNMULTI_0_6_H40F_5_0006	525.849	267.805
PCT_DYNMULTI_0_6_H40F_6_0007	525.883	267.813
PCT_DYNMULTI_0_6_H40F_7_0008	526.096	267.861
PCT_DYNMULTI_0_6_H40F_8_0009	525.95	267.65
PCT_DYNMULTI_0_6_H40F_9_0010	526.062	267.768
PCT_DYNMULTI_0_6_H40F_10_0011	526.298	267.843
PCT_DYNMULTI_0_6_H40F_11_0012	526.253	267.782
PCT_DYNMULTI_0_6_H40F_12_0013	526.129	267.697
PCT_DYNMULTI_0_6_H40F_13_0014	526.118	267.757
PCT_DYNMULTI_0_6_H40F_14_0015	526.107	267.79
PCT_DYNMULTI_0_6_H40F_15_0016	526.107	267.779
PCT_DYNMULTI_0_6_H40F_16_0017	526.107	267.752
PCT_DYNMULTI_0_6_H40F_17_0018	526.174	267.824
PCT_DYNMULTI_0_6_H40F_18_0019	526.129	267.821
PCT_DYNMULTI_0_6_H40F_19_0020	526.152	267.803
PCT_DYNMULTI_0_6_H40F_20_0021	526.253	267.836
PCT_DYNMULTI_0_6_H40F_21_0022	526.219	267.776
PCT_DYNMULTI_0_6_H40F_22_0023	526.253	267.842
PCT_DYNMULTI_0_6_H40F_23_0024	526.197	267.679
PCT_DYNMULTI_0_6_H40F_24_0025	526.23	267.782
PCT_DYNMULTI_0_6_H40F_25_0026	526.309	267.873
PCT_DYNMULTI_0_6_H40F_26_0027	526.398	267.99
PCT_DYNMULTI_0_6_H40F_27_0028	526.41	268.067
PCT_DYNMULTI_0_6_H40F_28_0029	526.488	268.048
PCT_DYNMULTI_0_6_H40F_29_0030	526.432	268.037
PCT_DYNMULTI_0_6_H40F_30_0031	526.488	267.982
PCT_DYNMULTI_0_6_H40F_31_0032	526.645	268.035
PCT_DYNMULTI_0_6_H40F_32_0033	526.544	268.093
PCT_DYNMULTI_0_6_H40F_33_0034	526.443	268.102
PCT_DYNMULTI_0_6_H40F_34_0035	526.365	268.058
PCT_DYNMULTI_0_6_H40F_35_0036	526.309	268.143
PCT_DYNMULTI_0_6_H40F_36_0037	526.286	268.114
PCT_DYNMULTI_0_6_H40F_37_0038	526.23	268.136
PCT_DYNMULTI_0_6_H40F_38_0039	526.309	268.214
PCT_DYNMULTI_0_6_H40F_39_0040	526.275	268.246
PCT_DYNMULTI_0_6_H40F_40_0041	526.354	268.235
PCT_DYNMULTI_0_6_H40F_41_0042	526.242	268.139
PCT_DYNMULTI_0_6_H40F_42_0043	526.365	268.193
PCT_DYNMULTI_0_6_H40F_43_0044	526.376	268.307
PCT_DYNMULTI_0_6_H40F_44_0045	526.365	268.254
PCT_DYNMULTI_0_6_H40F_45_0046	526.331	268.181
PCT_DYNMULTI_0_6_H40F_46_0047	526.354	268.177
PCT_DYNMULTI_0_6_H40F_47_0048	526.398	268.156
PCT_DYNMULTI_0_6_H40F_48_0049	526.376	268.179
PCT_DYNMULTI_0_6_H40F_49_0050	526.342	268.077
PCT_DYNMULTI_0_6_H40F_50_0051	526.488	268.263
PCT_DYNMULTI_0_6_H40F_51_0052	526.6	268.308
PCT_DYNMULTI_0_6_H40F_52_0053	526.544	268.24
PCT_DYNMULTI_0_6_H40F_53_0054	526.455	268.025
PCT_DYNMULTI_0_6_H40F_54_0055	526.432	268.01
PCT_DYNMULTI_0_6_H40F_55_0056	526.331	268.004
PCT_DYNMULTI_0_6_H40F_56_0057	526.174	267.911
PCT_DYNMULTI_0_6_H40F_57_0058	526.197	267.893
PCT_DYNMULTI_0_6_H40F_58_0059	526.286	267.925
PCT_DYNMULTI_0_6_H40F_59_0060	526.309	267.924
PCT_DYNMULTI_0_6_H40F_60_0061	526.354	268.074
PCT_DYNMULTI_0_6_H40F_61_0062	526.365	268.034
PCT_DYNMULTI_0_6_H40F_62_0063	526.589	268.197
PCT_DYNMULTI_0_6_H40F_63_0064	526.499	268.058
PCT_DYNMULTI_0_6_H40F_64_0065	526.533	268.188
PCT_DYNMULTI_0_6_H40F_65_0066	526.477	268.228
PCT_DYNMULTI_0_6_H40F_66_0067	526.477	268.206
PCT_DYNMULTI_0_6_H40F_67_0068	526.421	268.176
PCT_DYNMULTI_0_6_H40F_68_0069	526.41	268.251
PCT_DYNMULTI_0_6_H40F_69_0070	526.421	268.391
PCT_DYNMULTI_0_6_H40F_70_0071	526.376	268.263
PCT_DYNMULTI_0_6_H40F_71_0072	526.488	268.408
PCT_DYNMULTI_0_6_H40F_72_0073	526.376	268.426
PCT_DYNMULTI_0_6_H40F_73_0074	526.286	268.389
PCT_DYNMULTI_0_6_H40F_74_0075	526.264	268.352
PCT_DYNMULTI_0_6_H40F_75_0076	526.185	268.32
PCT_DYNMULTI_0_6_H40F_76_0077	526.387	268.308
PCT_DYNMULTI_0_6_H40F_77_0078	526.499	268.342
PCT_DYNMULTI_0_6_H40F_78_0079	526.533	268.349
PCT_DYNMULTI_0_6_H40F_79_0080	526.567	268.368
PCT_DYNMULTI_0_6_H40F_80_0081	526.623	268.405
PCT_DYNMULTI_0_6_H40F_81_0082	526.589	268.327
PCT_DYNMULTI_0_6_H40F_82_0083	526.623	268.496
PCT_DYNMULTI_0_6_H40F_83_0084	526.567	268.398
PCT_DYNMULTI_0_6_H40F_84_0085	526.634	268.405
PCT_DYNMULTI_0_6_H40F_85_0086	526.544	268.337
PCT_DYNMULTI_0_6_H40F_86_0087	526.443	268.281
PCT_DYNMULTI_0_6_H40F_87_0088	526.544	268.377
PCT_DYNMULTI_0_6_H40F_88_0089	526.477	268.251
PCT_DYNMULTI_0_6_H40F_89_0090	526.6	268.329
PCT_DYNMULTI_0_6_H40F_90_0091	526.6	268.337
PCT_DYNMULTI_0_6_H40F_91_0092	526.701	268.374
PCT_DYNMULTI_0_6_H40F_92_0093	526.701	268.416
PCT_DYNMULTI_0_6_H40F_93_0094	526.679	268.346
PCT_DYNMULTI_0_6_H40F_94_0095	526.567	268.282
Patient Name	EXP3-00-000
Patient ID	24.11.15-18:24:51-STD-1.3.12.2.1107.5.1.4.64279
Set constrast treshold [min] [max]	399	400
Resolution [#] (px,py,slice)	512	512	64
Resolution [mm] (px,py,slice)	0.1367	0.1367	0.6
Scaled Resolution [#] (px,py,slice)	512	512	64
Scaled Resolution [mm] (px,py,slice)	0.1367	0.1367	0.6
Mask XY/Axial Plane ROI points	[216 189 100 100]	Mask XY/Axial Plane ROI slice #	39
Mask XZ/Sagittal Plane ROI points	[1 1 1 1]	Mask XZ/Sagittal Plane ROI slice #	1
Mask YZ/Coronal Plane ROI points	[1 1 1 1]	Mask YZ/Coronal Plane ROI slice #	1

## Sheet: EXP3-00-070
Order	Volume mm3	Surface mm2
PCT_DYNMULTI_0_6_H40F_1_0002	531.803	269.876
PCT_DYNMULTI_0_6_H40F_2_0003	531.13	269.469
PCT_DYNMULTI_0_6_H40F_3_0004	529.168	268.921
PCT_DYNMULTI_0_6_H40F_4_0005	527.049	267.985
PCT_DYNMULTI_0_6_H40F_5_0006	525.804	267.377
PCT_DYNMULTI_0_6_H40F_6_0007	524.918	267.212
PCT_DYNMULTI_0_6_H40F_7_0008	524.75	267.06
PCT_DYNMULTI_0_6_H40F_8_0009	525.132	267.212
PCT_DYNMULTI_0_6_H40F_9_0010	526.6	267.796
PCT_DYNMULTI_0_6_H40F_10_0011	528.63	268.543
PCT_DYNMULTI_0_6_H40F_11_0012	530.065	269.275
PCT_DYNMULTI_0_6_H40F_12_0013	531.814	269.816
PCT_DYNMULTI_0_6_H40F_13_0014	532.274	269.936
PCT_DYNMULTI_0_6_H40F_14_0015	532.307	269.893
PCT_DYNMULTI_0_6_H40F_15_0016	531.141	269.582
PCT_DYNMULTI_0_6_H40F_16_0017	529.639	268.999
PCT_DYNMULTI_0_6_H40F_17_0018	528.058	268.195
PCT_DYNMULTI_0_6_H40F_18_0019	526.208	267.658
PCT_DYNMULTI_0_6_H40F_19_0020	524.907	267.168
PCT_DYNMULTI_0_6_H40F_20_0021	524.862	267.244
PCT_DYNMULTI_0_6_H40F_21_0022	525.311	267.329
PCT_DYNMULTI_0_6_H40F_22_0023	526.275	267.49
PCT_DYNMULTI_0_6_H40F_23_0024	527.43	267.954
PCT_DYNMULTI_0_6_H40F_24_0025	530.009	269.151
PCT_DYNMULTI_0_6_H40F_25_0026	531.848	269.716
PCT_DYNMULTI_0_6_H40F_26_0027	532.229	269.82
PCT_DYNMULTI_0_6_H40F_27_0028	532.498	270.007
PCT_DYNMULTI_0_6_H40F_28_0029	531.87	269.825
PCT_DYNMULTI_0_6_H40F_29_0030	531.164	269.427
PCT_DYNMULTI_0_6_H40F_30_0031	528.652	268.472
PCT_DYNMULTI_0_6_H40F_31_0032	526.421	267.697
PCT_DYNMULTI_0_6_H40F_32_0033	525.591	267.35
PCT_DYNMULTI_0_6_H40F_33_0034	524.907	267.091
PCT_DYNMULTI_0_6_H40F_34_0035	524.941	267.252
PCT_DYNMULTI_0_6_H40F_35_0036	525.468	267.44
PCT_DYNMULTI_0_6_H40F_36_0037	527.094	268.063
PCT_DYNMULTI_0_6_H40F_37_0038	529.325	268.903
PCT_DYNMULTI_0_6_H40F_38_0039	530.838	269.54
PCT_DYNMULTI_0_6_H40F_39_0040	532.072	270.149
PCT_DYNMULTI_0_6_H40F_40_0041	532.52	270.295
PCT_DYNMULTI_0_6_H40F_41_0042	532.285	270.217
PCT_DYNMULTI_0_6_H40F_42_0043	531.108	269.796
PCT_DYNMULTI_0_6_H40F_43_0044	529.078	268.761
PCT_DYNMULTI_0_6_H40F_44_0045	527.542	268.037
PCT_DYNMULTI_0_6_H40F_45_0046	525.928	267.5
PCT_DYNMULTI_0_6_H40F_46_0047	525.075	267.164
PCT_DYNMULTI_0_6_H40F_47_0048	524.997	267.124
PCT_DYNMULTI_0_6_H40F_48_0049	525.703	267.44
PCT_DYNMULTI_0_6_H40F_49_0050	527.015	268.08
PCT_DYNMULTI_0_6_H40F_50_0051	528.226	268.445
PCT_DYNMULTI_0_6_H40F_51_0052	530.85	269.602
PCT_DYNMULTI_0_6_H40F_52_0053	532.218	270.141
PCT_DYNMULTI_0_6_H40F_53_0054	532.621	270.249
PCT_DYNMULTI_0_6_H40F_54_0055	532.352	270.061
PCT_DYNMULTI_0_6_H40F_55_0056	531.657	269.876
PCT_DYNMULTI_0_6_H40F_56_0057	530.693	269.46
PCT_DYNMULTI_0_6_H40F_57_0058	527.878	268.324
PCT_DYNMULTI_0_6_H40F_58_0059	525.894	267.551
PCT_DYNMULTI_0_6_H40F_59_0060	525.154	267.298
PCT_DYNMULTI_0_6_H40F_60_0061	524.941	267.206
PCT_DYNMULTI_0_6_H40F_61_0062	525.232	267.479
PCT_DYNMULTI_0_6_H40F_62_0063	525.715	267.49
PCT_DYNMULTI_0_6_H40F_63_0064	527.677	268.244
PCT_DYNMULTI_0_6_H40F_64_0065	529.728	269.2
PCT_DYNMULTI_0_6_H40F_65_0066	530.939	269.648
PCT_DYNMULTI_0_6_H40F_66_0067	531.792	270.001
PCT_DYNMULTI_0_6_H40F_67_0068	531.803	270.047
PCT_DYNMULTI_0_6_H40F_68_0069	531.511	269.787
PCT_DYNMULTI_0_6_H40F_69_0070	530.11	269.35
PCT_DYNMULTI_0_6_H40F_70_0071	528.338	268.57
PCT_DYNMULTI_0_6_H40F_71_0072	526.948	267.89
PCT_DYNMULTI_0_6_H40F_72_0073	525.647	267.518
PCT_DYNMULTI_0_6_H40F_73_0074	525.019	267.388
PCT_DYNMULTI_0_6_H40F_74_0075	525.075	267.258
PCT_DYNMULTI_0_6_H40F_75_0076	526.062	267.636
PCT_DYNMULTI_0_6_H40F_76_0077	527.43	268.18
PCT_DYNMULTI_0_6_H40F_77_0078	528.753	268.69
PCT_DYNMULTI_0_6_H40F_78_0079	531.22	269.607
PCT_DYNMULTI_0_6_H40F_79_0080	532.285	270.079
PCT_DYNMULTI_0_6_H40F_80_0081	532.509	270.194
PCT_DYNMULTI_0_6_H40F_81_0082	532.139	270.125
PCT_DYNMULTI_0_6_H40F_82_0083	530.951	269.501
PCT_DYNMULTI_0_6_H40F_83_0084	529.885	269.144
PCT_DYNMULTI_0_6_H40F_84_0085	527.251	268.065
PCT_DYNMULTI_0_6_H40F_85_0086	525.502	267.543
PCT_DYNMULTI_0_6_H40F_86_0087	525.109	267.382
PCT_DYNMULTI_0_6_H40F_87_0088	524.907	267.147
PCT_DYNMULTI_0_6_H40F_88_0089	525.479	267.398
PCT_DYNMULTI_0_6_H40F_89_0090	526.298	267.684
PCT_DYNMULTI_0_6_H40F_90_0091	528.529	268.635
PCT_DYNMULTI_0_6_H40F_91_0092	530.738	269.468
PCT_DYNMULTI_0_6_H40F_92_0093	531.78	269.856
PCT_DYNMULTI_0_6_H40F_93_0094	532.576	270.239
PCT_DYNMULTI_0_6_H40F_94_0095	532.464	270.195
Patient Name	EXP3-00-070
Patient ID	24.11.15-18:27:10-STD-1.3.12.2.1107.5.1.4.64279
Set constrast treshold [min] [max]	399	400
Resolution [#] (px,py,slice)	512	512	64
Resolution [mm] (px,py,slice)	0.1367	0.1367	0.6
Scaled Resolution [#] (px,py,slice)	512	512	64
Scaled Resolution [mm] (px,py,slice)	0.1367	0.1367	0.6
Mask XY/Axial Plane ROI points	[209 182 100 100]	Mask XY/Axial Plane ROI slice #	39
Mask XZ/Sagittal Plane ROI points	[1 1 1 1]	Mask XZ/Sagittal Plane ROI slice #	1
Mask YZ/Coronal Plane ROI points	[1 1 1 1]	Mask YZ/Coronal Plane ROI slice #	1

## Sheet: EXP3-00-115
Order	Volume mm3	Surface mm2
PCT_DYNMULTI_0_6_H40F_1_0002	535.884	272.776
PCT_DYNMULTI_0_6_H40F_2_0003	535.559	272.647
PCT_DYNMULTI_0_6_H40F_3_0004	533.832	272.004
PCT_DYNMULTI_0_6_H40F_4_0005	531.108	271.138
PCT_DYNMULTI_0_6_H40F_5_0006	529.022	270.377
PCT_DYNMULTI_0_6_H40F_6_0007	525.502	269.116
PCT_DYNMULTI_0_6_H40F_7_0008	524.38	268.7
PCT_DYNMULTI_0_6_H40F_8_0009	524.089	268.659
PCT_DYNMULTI_0_6_H40F_9_0010	524.918	268.939
PCT_DYNMULTI_0_6_H40F_10_0011	526.78	269.6
PCT_DYNMULTI_0_6_H40F_11_0012	529.224	270.422
PCT_DYNMULTI_0_6_H40F_12_0013	533.272	271.881
PCT_DYNMULTI_0_6_H40F_13_0014	535.458	272.654
PCT_DYNMULTI_0_6_H40F_14_0015	536.142	272.921
PCT_DYNMULTI_0_6_H40F_15_0016	536.007	272.902
PCT_DYNMULTI_0_6_H40F_16_0017	534.965	272.512
PCT_DYNMULTI_0_6_H40F_17_0018	533.137	271.688
PCT_DYNMULTI_0_6_H40F_18_0019	528.787	270.368
PCT_DYNMULTI_0_6_H40F_19_0020	526.174	269.57
PCT_DYNMULTI_0_6_H40F_20_0021	524.941	269.115
PCT_DYNMULTI_0_6_H40F_21_0022	524.122	268.851
PCT_DYNMULTI_0_6_H40F_22_0023	524.481	268.958
PCT_DYNMULTI_0_6_H40F_23_0024	525.58	269.391
PCT_DYNMULTI_0_6_H40F_24_0025	529.347	270.484
PCT_DYNMULTI_0_6_H40F_25_0026	532.509	271.639
PCT_DYNMULTI_0_6_H40F_26_0027	534.325	272.396
PCT_DYNMULTI_0_6_H40F_27_0028	535.794	272.88
PCT_DYNMULTI_0_6_H40F_28_0029	535.817	272.92
PCT_DYNMULTI_0_6_H40F_29_0030	535.29	272.68
PCT_DYNMULTI_0_6_H40F_30_0031	532.767	271.846
PCT_DYNMULTI_0_6_H40F_31_0032	529.594	270.763
PCT_DYNMULTI_0_6_H40F_32_0033	527.733	270.027
PCT_DYNMULTI_0_6_H40F_33_0034	524.84	269.118
PCT_DYNMULTI_0_6_H40F_34_0035	523.865	268.912
PCT_DYNMULTI_0_6_H40F_35_0036	524.01	268.902
PCT_DYNMULTI_0_6_H40F_36_0037	525.67	269.516
PCT_DYNMULTI_0_6_H40F_37_0038	528.103	270.42
PCT_DYNMULTI_0_6_H40F_38_0039	530.525	271.059
PCT_DYNMULTI_0_6_H40F_39_0040	534.124	272.338
PCT_DYNMULTI_0_6_H40F_40_0041	535.761	273.03
PCT_DYNMULTI_0_6_H40F_41_0042	536.254	273.188
PCT_DYNMULTI_0_6_H40F_42_0043	535.559	272.872
PCT_DYNMULTI_0_6_H40F_43_0044	533.922	272.163
PCT_DYNMULTI_0_6_H40F_44_0045	531.937	271.561
PCT_DYNMULTI_0_6_H40F_45_0046	527.665	270.089
PCT_DYNMULTI_0_6_H40F_46_0047	525.401	269.298
PCT_DYNMULTI_0_6_H40F_47_0048	524.627	269.04
PCT_DYNMULTI_0_6_H40F_48_0049	524.156	268.882
PCT_DYNMULTI_0_6_H40F_49_0050	524.952	269.072
PCT_DYNMULTI_0_6_H40F_50_0051	526.511	269.63
PCT_DYNMULTI_0_6_H40F_51_0052	530.457	271.073
PCT_DYNMULTI_0_6_H40F_52_0053	533.574	272.144
PCT_DYNMULTI_0_6_H40F_53_0054	535.122	272.738
PCT_DYNMULTI_0_6_H40F_54_0055	536.164	273.197
PCT_DYNMULTI_0_6_H40F_55_0056	535.951	273.015
PCT_DYNMULTI_0_6_H40F_56_0057	535.088	272.742
PCT_DYNMULTI_0_6_H40F_57_0058	531.926	271.646
PCT_DYNMULTI_0_6_H40F_58_0059	528.428	270.242
PCT_DYNMULTI_0_6_H40F_59_0060	526.511	269.653
PCT_DYNMULTI_0_6_H40F_60_0061	524.212	268.858
PCT_DYNMULTI_0_6_H40F_61_0062	523.696	268.749
PCT_DYNMULTI_0_6_H40F_62_0063	524.122	269.004
PCT_DYNMULTI_0_6_H40F_63_0064	526.275	269.632
PCT_DYNMULTI_0_6_H40F_64_0065	529.168	270.569
PCT_DYNMULTI_0_6_H40F_65_0066	531.466	271.357
PCT_DYNMULTI_0_6_H40F_66_0067	534.662	272.71
PCT_DYNMULTI_0_6_H40F_67_0068	536.063	273.14
PCT_DYNMULTI_0_6_H40F_68_0069	536.187	273.184
PCT_DYNMULTI_0_6_H40F_69_0070	535.548	272.998
PCT_DYNMULTI_0_6_H40F_70_0071	533.395	272.05
PCT_DYNMULTI_0_6_H40F_71_0072	531.186	271.403
PCT_DYNMULTI_0_6_H40F_72_0073	527.262	269.759
PCT_DYNMULTI_0_6_H40F_73_0074	525.132	269.262
PCT_DYNMULTI_0_6_H40F_74_0075	524.492	269.105
PCT_DYNMULTI_0_6_H40F_75_0076	524.492	269.059
PCT_DYNMULTI_0_6_H40F_76_0077	525.389	269.336
PCT_DYNMULTI_0_6_H40F_77_0078	527.452	269.989
PCT_DYNMULTI_0_6_H40F_78_0079	531.567	271.608
PCT_DYNMULTI_0_6_H40F_79_0080	534.516	272.555
PCT_DYNMULTI_0_6_H40F_80_0081	535.604	272.997
PCT_DYNMULTI_0_6_H40F_81_0082	536.355	273.222
PCT_DYNMULTI_0_6_H40F_82_0083	535.929	273.032
PCT_DYNMULTI_0_6_H40F_83_0084	534.931	272.675
PCT_DYNMULTI_0_6_H40F_84_0085	531.22	271.408
PCT_DYNMULTI_0_6_H40F_85_0086	528.17	270.229
PCT_DYNMULTI_0_6_H40F_86_0087	526.443	269.747
PCT_DYNMULTI_0_6_H40F_87_0088	524.414	268.946
PCT_DYNMULTI_0_6_H40F_88_0089	524.201	268.873
PCT_DYNMULTI_0_6_H40F_89_0090	524.907	269.215
PCT_DYNMULTI_0_6_H40F_90_0091	527.251	269.966
PCT_DYNMULTI_0_6_H40F_91_0092	530.39	270.986
PCT_DYNMULTI_0_6_H40F_92_0093	532.554	271.868
PCT_DYNMULTI_0_6_H40F_93_0094	535.155	272.776
PCT_DYNMULTI_0_6_H40F_94_0095	536.018	272.997
Patient Name	EXP3-00-115
Patient ID	24.11.15-18:29:06-STD-1.3.12.2.1107.5.1.4.64279
Set constrast treshold [min] [max]	399	400
Resolution [#] (px,py,slice)	512	512	64
Resolution [mm] (px,py,slice)	0.1367	0.1367	0.6
Scaled Resolution [#] (px,py,slice)	512	512	64
Scaled Resolution [mm] (px,py,slice)	0.1367	0.1367	0.6
Mask XY/Axial Plane ROI points	[215 182 100 100]	Mask XY/Axial Plane ROI slice #	40
Mask XZ/Sagittal Plane ROI points	[1 1 1 1]	Mask XZ/Sagittal Plane ROI slice #	1
Mask YZ/Coronal Plane ROI points	[1 1 1 1]	Mask YZ/Coronal Plane ROI slice #	1

## Sheet: EXP3-00-195
Order	Volume mm3	Surface mm2
PCT_DYNMULTI_0_6_H40F_1_0002	524.941	272.436
PCT_DYNMULTI_0_6_H40F_2_0003	527.834	273.374
PCT_DYNMULTI_0_6_H40F_3_0004	530.155	274.147
PCT_DYNMULTI_0_6_H40F_4_0005	530.312	274.248
PCT_DYNMULTI_0_6_H40F_5_0006	529.112	273.816
PCT_DYNMULTI_0_6_H40F_6_0007	524.044	271.719
PCT_DYNMULTI_0_6_H40F_7_0008	519.144	270.25
PCT_DYNMULTI_0_6_H40F_8_0009	515.758	269.13
PCT_DYNMULTI_0_6_H40F_9_0010	512.238	268.055
PCT_DYNMULTI_0_6_H40F_10_0011	510.791	267.39
PCT_DYNMULTI_0_6_H40F_11_0012	510.971	267.445
PCT_DYNMULTI_0_6_H40F_12_0013	513.628	268.477
PCT_DYNMULTI_0_6_H40F_13_0014	518.315	269.857
PCT_DYNMULTI_0_6_H40F_14_0015	521.813	271.111
PCT_DYNMULTI_0_6_H40F_15_0016	526.365	272.881
PCT_DYNMULTI_0_6_H40F_16_0017	529.325	273.889
PCT_DYNMULTI_0_6_H40F_17_0018	530.065	274.031
PCT_DYNMULTI_0_6_H40F_18_0019	529.078	273.731
PCT_DYNMULTI_0_6_H40F_19_0020	525.972	272.531
PCT_DYNMULTI_0_6_H40F_20_0021	522.463	271.598
PCT_DYNMULTI_0_6_H40F_21_0022	517.081	269.692
PCT_DYNMULTI_0_6_H40F_22_0023	512.989	268.076
PCT_DYNMULTI_0_6_H40F_23_0024	511.744	267.678
PCT_DYNMULTI_0_6_H40F_24_0025	511.598	267.618
PCT_DYNMULTI_0_6_H40F_25_0026	512.921	268.075
PCT_DYNMULTI_0_6_H40F_26_0027	515.68	269.172
PCT_DYNMULTI_0_6_H40F_27_0028	521.488	271.222
PCT_DYNMULTI_0_6_H40F_28_0029	526.118	272.743
PCT_DYNMULTI_0_6_H40F_29_0030	528.562	273.578
PCT_DYNMULTI_0_6_H40F_30_0031	530.009	273.991
PCT_DYNMULTI_0_6_H40F_31_0032	529.684	273.903
PCT_DYNMULTI_0_6_H40F_32_0033	527.822	273.32
PCT_DYNMULTI_0_6_H40F_33_0034	522.362	271.36
PCT_DYNMULTI_0_6_H40F_34_0035	517.171	269.596
PCT_DYNMULTI_0_6_H40F_35_0036	514.368	268.548
PCT_DYNMULTI_0_6_H40F_36_0037	511.419	267.568
PCT_DYNMULTI_0_6_H40F_37_0038	510.791	267.463
PCT_DYNMULTI_0_6_H40F_38_0039	511.341	267.622
PCT_DYNMULTI_0_6_H40F_39_0040	514.996	268.754
PCT_DYNMULTI_0_6_H40F_40_0041	520.176	270.525
PCT_DYNMULTI_0_6_H40F_41_0042	523.741	271.805
PCT_DYNMULTI_0_6_H40F_42_0043	528.035	273.392
PCT_DYNMULTI_0_6_H40F_43_0044	529.93	274.011
PCT_DYNMULTI_0_6_H40F_44_0045	530.02	274.023
PCT_DYNMULTI_0_6_H40F_45_0046	528.405	273.434
PCT_DYNMULTI_0_6_H40F_46_0047	523.842	271.997
PCT_DYNMULTI_0_6_H40F_47_0048	520.378	270.978
PCT_DYNMULTI_0_6_H40F_48_0049	515.265	268.662
PCT_DYNMULTI_0_6_H40F_49_0050	512.137	267.721
PCT_DYNMULTI_0_6_H40F_50_0051	511.385	267.588
PCT_DYNMULTI_0_6_H40F_51_0052	511.711	267.737
PCT_DYNMULTI_0_6_H40F_52_0053	514.054	268.318
PCT_DYNMULTI_0_6_H40F_53_0054	517.227	269.53
PCT_DYNMULTI_0_6_H40F_54_0055	523.001	271.577
PCT_DYNMULTI_0_6_H40F_55_0056	527.228	273.108
PCT_DYNMULTI_0_6_H40F_56_0057	529.19	273.801
PCT_DYNMULTI_0_6_H40F_57_0058	530.02	274.234
PCT_DYNMULTI_0_6_H40F_58_0059	529.157	273.767
PCT_DYNMULTI_0_6_H40F_59_0060	526.825	272.76
PCT_DYNMULTI_0_6_H40F_60_0061	520.86	270.804
PCT_DYNMULTI_0_6_H40F_61_0062	516.016	269.242
PCT_DYNMULTI_0_6_H40F_62_0063	513.213	268.158
PCT_DYNMULTI_0_6_H40F_63_0064	510.937	267.489
PCT_DYNMULTI_0_6_H40F_64_0065	510.791	267.454
PCT_DYNMULTI_0_6_H40F_65_0066	511.688	267.78
PCT_DYNMULTI_0_6_H40F_66_0067	516.599	269.416
PCT_DYNMULTI_0_6_H40F_67_0068	522.037	271.409
PCT_DYNMULTI_0_6_H40F_68_0069	525.098	272.498
PCT_DYNMULTI_0_6_H40F_69_0070	529.112	273.837
PCT_DYNMULTI_0_6_H40F_70_0071	530.39	274.287
PCT_DYNMULTI_0_6_H40F_71_0072	530.278	274.183
PCT_DYNMULTI_0_6_H40F_72_0073	527.766	273.186
PCT_DYNMULTI_0_6_H40F_73_0074	522.889	271.633
PCT_DYNMULTI_0_6_H40F_74_0075	519.447	270.575
PCT_DYNMULTI_0_6_H40F_75_0076	514.357	268.594
PCT_DYNMULTI_0_6_H40F_76_0077	511.912	267.973
PCT_DYNMULTI_0_6_H40F_77_0078	511.498	267.825
PCT_DYNMULTI_0_6_H40F_78_0079	512.395	267.885
PCT_DYNMULTI_0_6_H40F_79_0080	515.568	268.963
PCT_DYNMULTI_0_6_H40F_80_0081	518.954	270.123
PCT_DYNMULTI_0_6_H40F_81_0082	524.47	272.252
PCT_DYNMULTI_0_6_H40F_82_0083	528.473	273.404
PCT_DYNMULTI_0_6_H40F_83_0084	529.65	273.88
PCT_DYNMULTI_0_6_H40F_84_0085	530.121	273.947
PCT_DYNMULTI_0_6_H40F_85_0086	528.506	273.568
PCT_DYNMULTI_0_6_H40F_86_0087	525.928	272.656
PCT_DYNMULTI_0_6_H40F_87_0088	519.828	270.326
PCT_DYNMULTI_0_6_H40F_88_0089	515.097	268.869
PCT_DYNMULTI_0_6_H40F_89_0090	512.865	268.165
PCT_DYNMULTI_0_6_H40F_90_0091	511.285	267.636
PCT_DYNMULTI_0_6_H40F_91_0092	511.576	267.691
PCT_DYNMULTI_0_6_H40F_92_0093	512.809	268.109
PCT_DYNMULTI_0_6_H40F_93_0094	518.292	270.164
PCT_DYNMULTI_0_6_H40F_94_0095	523.551	271.912
Patient Name	EXP3-00-195
Patient ID	24.11.15-18:30:58-STD-1.3.12.2.1107.5.1.4.64279
Set constrast treshold [min] [max]	399	400
Resolution [#] (px,py,slice)	512	512	64
Resolution [mm] (px,py,slice)	0.1367	0.1367	0.6
Scaled Resolution [#] (px,py,slice)	512	512	64
Scaled Resolution [mm] (px,py,slice)	0.1367	0.1367	0.6
Mask XY/Axial Plane ROI points	[216 188 100 100]	Mask XY/Axial Plane ROI slice #	42
Mask XZ/Sagittal Plane ROI points	[1 1 1 1]	Mask XZ/Sagittal Plane ROI slice #	1
Mask YZ/Coronal Plane ROI points	[1 1 1 1]	Mask YZ/Coronal Plane ROI slice #	1

## Sheet: EXP3-00-270
Order	Volume mm3	Surface mm2
PCT_DYNMULTI_0_6_H40F_1_0002	541.849	278.346
PCT_DYNMULTI_0_6_H40F_2_0003	542.858	278.716
PCT_DYNMULTI_0_6_H40F_3_0004	541.333	278.153
PCT_DYNMULTI_0_6_H40F_4_0005	535.189	275.634
PCT_DYNMULTI_0_6_H40F_5_0006	526.959	273.036
PCT_DYNMULTI_0_6_H40F_6_0007	519.873	270.809
PCT_DYNMULTI_0_6_H40F_7_0008	511.733	267.67
PCT_DYNMULTI_0_6_H40F_8_0009	509.02	267.024
PCT_DYNMULTI_0_6_H40F_9_0010	509.233	267.035
PCT_DYNMULTI_0_6_H40F_10_0011	512.776	268.244
PCT_DYNMULTI_0_6_H40F_11_0012	519.111	270.021
PCT_DYNMULTI_0_6_H40F_12_0013	525.288	272.006
PCT_DYNMULTI_0_6_H40F_13_0014	534.572	275.907
PCT_DYNMULTI_0_6_H40F_14_0015	540.156	277.691
PCT_DYNMULTI_0_6_H40F_15_0016	542.208	278.655
PCT_DYNMULTI_0_6_H40F_16_0017	541.613	278.46
PCT_DYNMULTI_0_6_H40F_17_0018	537.723	276.989
PCT_DYNMULTI_0_6_H40F_18_0019	531.41	274.844
PCT_DYNMULTI_0_6_H40F_19_0020	520.669	270.625
PCT_DYNMULTI_0_6_H40F_20_0021	513.605	268.176
PCT_DYNMULTI_0_6_H40F_21_0022	510.365	267.416
PCT_DYNMULTI_0_6_H40F_22_0023	509.423	266.868
PCT_DYNMULTI_0_6_H40F_23_0024	511.329	267.523
PCT_DYNMULTI_0_6_H40F_24_0025	515.938	268.956
PCT_DYNMULTI_0_6_H40F_25_0026	524.492	272.176
PCT_DYNMULTI_0_6_H40F_26_0027	532.509	275.026
PCT_DYNMULTI_0_6_H40F_27_0028	538.844	277.31
PCT_DYNMULTI_0_6_H40F_28_0029	542.824	278.702
PCT_DYNMULTI_0_6_H40F_29_0030	542.981	278.803
PCT_DYNMULTI_0_6_H40F_30_0031	540.268	277.757
PCT_DYNMULTI_0_6_H40F_31_0032	533.204	275.002
PCT_DYNMULTI_0_6_H40F_32_0033	524.504	272.077
PCT_DYNMULTI_0_6_H40F_33_0034	517.205	269.733
PCT_DYNMULTI_0_6_H40F_34_0035	510.477	267.38
PCT_DYNMULTI_0_6_H40F_35_0036	508.717	266.801
PCT_DYNMULTI_0_6_H40F_36_0037	509.928	267.139
PCT_DYNMULTI_0_6_H40F_37_0038	515.198	268.96
PCT_DYNMULTI_0_6_H40F_38_0039	521.723	270.807
PCT_DYNMULTI_0_6_H40F_39_0040	528.652	273.327
PCT_DYNMULTI_0_6_H40F_40_0041	537.14	276.771
PCT_DYNMULTI_0_6_H40F_41_0042	541.568	278.336
PCT_DYNMULTI_0_6_H40F_42_0043	542.454	278.775
PCT_DYNMULTI_0_6_H40F_43_0044	540.492	277.875
PCT_DYNMULTI_0_6_H40F_44_0045	535.772	276.382
PCT_DYNMULTI_0_6_H40F_45_0046	528.675	273.95
PCT_DYNMULTI_0_6_H40F_46_0047	518.281	269.791
PCT_DYNMULTI_0_6_H40F_47_0048	512.137	268.083
PCT_DYNMULTI_0_6_H40F_48_0049	509.805	267.232
PCT_DYNMULTI_0_6_H40F_49_0050	509.805	267.19
PCT_DYNMULTI_0_6_H40F_50_0051	512.899	268.112
PCT_DYNMULTI_0_6_H40F_51_0052	518.258	269.718
PCT_DYNMULTI_0_6_H40F_52_0053	526.869	273.015
PCT_DYNMULTI_0_6_H40F_53_0054	534.673	275.618
PCT_DYNMULTI_0_6_H40F_54_0055	540.201	277.616
PCT_DYNMULTI_0_6_H40F_55_0056	543.127	278.743
PCT_DYNMULTI_0_6_H40F_56_0057	542.544	278.642
PCT_DYNMULTI_0_6_H40F_57_0058	538.496	277.099
PCT_DYNMULTI_0_6_H40F_58_0059	530.289	274.053
PCT_DYNMULTI_0_6_H40F_59_0060	521.588	271.429
PCT_DYNMULTI_0_6_H40F_60_0061	514.693	269.103
PCT_DYNMULTI_0_6_H40F_61_0062	509.636	267.048
PCT_DYNMULTI_0_6_H40F_62_0063	508.964	266.928
PCT_DYNMULTI_0_6_H40F_63_0064	510.959	267.457
PCT_DYNMULTI_0_6_H40F_64_0065	517.642	269.843
PCT_DYNMULTI_0_6_H40F_65_0066	524.335	271.927
PCT_DYNMULTI_0_6_H40F_66_0067	531.78	274.31
PCT_DYNMULTI_0_6_H40F_67_0068	539.472	277.856
PCT_DYNMULTI_0_6_H40F_68_0069	542.925	278.916
PCT_DYNMULTI_0_6_H40F_69_0070	542.959	278.96
PCT_DYNMULTI_0_6_H40F_70_0071	539.954	277.621
PCT_DYNMULTI_0_6_H40F_71_0072	533.742	275.574
PCT_DYNMULTI_0_6_H40F_72_0073	525.759	273.022
PCT_DYNMULTI_0_6_H40F_73_0074	516.027	269.142
PCT_DYNMULTI_0_6_H40F_74_0075	511.083	267.646
PCT_DYNMULTI_0_6_H40F_75_0076	509.648	267.155
PCT_DYNMULTI_0_6_H40F_76_0077	510.668	267.741
PCT_DYNMULTI_0_6_H40F_77_0078	514.794	268.778
PCT_DYNMULTI_0_6_H40F_78_0079	520.927	270.436
PCT_DYNMULTI_0_6_H40F_79_0080	529.415	273.975
PCT_DYNMULTI_0_6_H40F_80_0081	536.994	276.616
PCT_DYNMULTI_0_6_H40F_81_0082	541.591	278.209
PCT_DYNMULTI_0_6_H40F_82_0083	543.015	278.728
PCT_DYNMULTI_0_6_H40F_83_0084	541.568	278.338
PCT_DYNMULTI_0_6_H40F_84_0085	536.366	276.72
PCT_DYNMULTI_0_6_H40F_85_0086	527.127	273.031
PCT_DYNMULTI_0_6_H40F_86_0087	518.763	270.256
PCT_DYNMULTI_0_6_H40F_87_0088	512.664	268.366
PCT_DYNMULTI_0_6_H40F_88_0089	509.278	266.894
PCT_DYNMULTI_0_6_H40F_89_0090	509.311	266.916
PCT_DYNMULTI_0_6_H40F_90_0091	512.596	268.018
PCT_DYNMULTI_0_6_H40F_91_0092	519.974	270.575
PCT_DYNMULTI_0_6_H40F_92_0093	526.836	272.752
PCT_DYNMULTI_0_6_H40F_93_0094	534.516	275.61
Patient Name	EXP3-00-270
Patient ID	24.11.15-18:32:47-STD-1.3.12.2.1107.5.1.4.64279
Set constrast treshold [min] [max]	399	400
Resolution [#] (px,py,slice)	512	512	64
Resolution [mm] (px,py,slice)	0.1367	0.1367	0.6
Scaled Resolution [#] (px,py,slice)	512	512	64
Scaled Resolution [mm] (px,py,slice)	0.1367	0.1367	0.6
Mask XY/Axial Plane ROI points	[212 181 100 100]	Mask XY/Axial Plane ROI slice #	41
Mask XZ/Sagittal Plane ROI points	[1 1 1 1]	Mask XZ/Sagittal Plane ROI slice #	1
Mask YZ/Coronal Plane ROI points	[1 1 1 1]	Mask YZ/Coronal Plane ROI slice #	1

## Sheet: EXP3-12-000
Order	Volume mm3	Surface mm2
PCT_DYNMULTI_0_6_H40F_1_0002	523.607	266.624
PCT_DYNMULTI_0_6_H40F_2_0003	523.584	266.788
PCT_DYNMULTI_0_6_H40F_3_0004	523.528	266.717
PCT_DYNMULTI_0_6_H40F_4_0005	523.461	266.755
PCT_DYNMULTI_0_6_H40F_5_0006	523.539	266.767
PCT_DYNMULTI_0_6_H40F_6_0007	523.551	266.796
PCT_DYNMULTI_0_6_H40F_7_0008	523.607	266.927
PCT_DYNMULTI_0_6_H40F_8_0009	523.483	266.713
PCT_DYNMULTI_0_6_H40F_9_0010	523.517	266.784
PCT_DYNMULTI_0_6_H40F_10_0011	523.517	266.753
PCT_DYNMULTI_0_6_H40F_11_0012	523.528	266.738
PCT_DYNMULTI_0_6_H40F_12_0013	523.618	266.809
PCT_DYNMULTI_0_6_H40F_13_0014	523.438	266.637
PCT_DYNMULTI_0_6_H40F_14_0015	523.394	266.651
PCT_DYNMULTI_0_6_H40F_15_0016	523.483	266.768
PCT_DYNMULTI_0_6_H40F_16_0017	523.36	266.788
PCT_DYNMULTI_0_6_H40F_17_0018	523.326	266.759
PCT_DYNMULTI_0_6_H40F_18_0019	523.394	266.822
PCT_DYNMULTI_0_6_H40F_19_0020	523.405	266.955
PCT_DYNMULTI_0_6_H40F_20_0021	523.461	266.804
PCT_DYNMULTI_0_6_H40F_21_0022	523.562	266.89
PCT_DYNMULTI_0_6_H40F_22_0023	523.595	266.883
PCT_DYNMULTI_0_6_H40F_23_0024	523.517	266.783
PCT_DYNMULTI_0_6_H40F_24_0025	523.517	266.789
PCT_DYNMULTI_0_6_H40F_25_0026	523.607	266.846
PCT_DYNMULTI_0_6_H40F_26_0027	523.775	267.039
PCT_DYNMULTI_0_6_H40F_27_0028	523.708	266.968
PCT_DYNMULTI_0_6_H40F_28_0029	523.786	266.989
PCT_DYNMULTI_0_6_H40F_29_0030	523.82	267.034
PCT_DYNMULTI_0_6_H40F_30_0031	523.898	267.132
PCT_DYNMULTI_0_6_H40F_31_0032	523.909	267.032
PCT_DYNMULTI_0_6_H40F_32_0033	523.741	267.065
PCT_DYNMULTI_0_6_H40F_33_0034	523.831	267.039
PCT_DYNMULTI_0_6_H40F_34_0035	523.965	267.016
PCT_DYNMULTI_0_6_H40F_35_0036	523.898	267.035
PCT_DYNMULTI_0_6_H40F_36_0037	523.865	267.152
PCT_DYNMULTI_0_6_H40F_37_0038	523.741	267.029
PCT_DYNMULTI_0_6_H40F_38_0039	523.808	267.032
PCT_DYNMULTI_0_6_H40F_39_0040	523.932	267.086
PCT_DYNMULTI_0_6_H40F_40_0041	523.752	267.075
PCT_DYNMULTI_0_6_H40F_41_0042	523.629	267.064
PCT_DYNMULTI_0_6_H40F_42_0043	523.73	267.129
PCT_DYNMULTI_0_6_H40F_43_0044	523.865	267.176
PCT_DYNMULTI_0_6_H40F_44_0045	523.943	267.227
PCT_DYNMULTI_0_6_H40F_45_0046	523.808	267.265
PCT_DYNMULTI_0_6_H40F_46_0047	523.909	267.338
PCT_DYNMULTI_0_6_H40F_47_0048	523.898	267.312
PCT_DYNMULTI_0_6_H40F_48_0049	523.876	267.219
PCT_DYNMULTI_0_6_H40F_49_0050	523.752	267.196
PCT_DYNMULTI_0_6_H40F_50_0051	523.708	267.109
PCT_DYNMULTI_0_6_H40F_51_0052	523.696	267.083
PCT_DYNMULTI_0_6_H40F_52_0053	523.909	267.151
PCT_DYNMULTI_0_6_H40F_53_0054	523.943	267.118
PCT_DYNMULTI_0_6_H40F_54_0055	523.943	267.081
PCT_DYNMULTI_0_6_H40F_55_0056	524.111	267.106
PCT_DYNMULTI_0_6_H40F_56_0057	524.044	267.057
PCT_DYNMULTI_0_6_H40F_57_0058	524.044	267.177
PCT_DYNMULTI_0_6_H40F_58_0059	523.865	267.198
PCT_DYNMULTI_0_6_H40F_59_0060	523.853	267.221
PCT_DYNMULTI_0_6_H40F_60_0061	523.887	267.139
PCT_DYNMULTI_0_6_H40F_61_0062	523.808	267.178
PCT_DYNMULTI_0_6_H40F_62_0063	523.853	267.277
PCT_DYNMULTI_0_6_H40F_63_0064	523.977	267.228
PCT_DYNMULTI_0_6_H40F_64_0065	524.089	267.293
PCT_DYNMULTI_0_6_H40F_65_0066	524.122	267.368
PCT_DYNMULTI_0_6_H40F_66_0067	524.089	267.298
PCT_DYNMULTI_0_6_H40F_67_0068	524.078	267.335
PCT_DYNMULTI_0_6_H40F_68_0069	524.089	267.303
PCT_DYNMULTI_0_6_H40F_69_0070	524.089	267.259
PCT_DYNMULTI_0_6_H40F_70_0071	524.033	267.258
PCT_DYNMULTI_0_6_H40F_71_0072	524.078	267.308
PCT_DYNMULTI_0_6_H40F_72_0073	523.988	267.411
PCT_DYNMULTI_0_6_H40F_73_0074	523.909	267.493
PCT_DYNMULTI_0_6_H40F_74_0075	523.988	267.399
PCT_DYNMULTI_0_6_H40F_75_0076	523.921	267.384
PCT_DYNMULTI_0_6_H40F_76_0077	523.999	267.462
PCT_DYNMULTI_0_6_H40F_77_0078	524.19	267.514
PCT_DYNMULTI_0_6_H40F_78_0079	524.178	267.59
PCT_DYNMULTI_0_6_H40F_79_0080	524.358	267.515
PCT_DYNMULTI_0_6_H40F_80_0081	524.257	267.514
PCT_DYNMULTI_0_6_H40F_81_0082	524.335	267.661
PCT_DYNMULTI_0_6_H40F_82_0083	524.369	267.544
PCT_DYNMULTI_0_6_H40F_83_0084	524.223	267.515
PCT_DYNMULTI_0_6_H40F_84_0085	524.268	267.475
PCT_DYNMULTI_0_6_H40F_85_0086	524.19	267.543
PCT_DYNMULTI_0_6_H40F_86_0087	524.156	267.562
PCT_DYNMULTI_0_6_H40F_87_0088	524.134	267.386
PCT_DYNMULTI_0_6_H40F_88_0089	524.055	267.389
PCT_DYNMULTI_0_6_H40F_89_0090	524.089	267.36
PCT_DYNMULTI_0_6_H40F_90_0091	523.977	267.222
PCT_DYNMULTI_0_6_H40F_91_0092	523.999	267.33
PCT_DYNMULTI_0_6_H40F_92_0093	523.977	267.181
PCT_DYNMULTI_0_6_H40F_93_0094	524.01	267.259
PCT_DYNMULTI_0_6_H40F_94_0095	524.033	267.308
Patient Name	EXP3-12-000
Patient ID	24.11.15-17:56:57-STD-1.3.12.2.1107.5.1.4.64279
Set constrast treshold [min] [max]	399	400
Resolution [#] (px,py,slice)	512	512	64
Resolution [mm] (px,py,slice)	0.1367	0.1367	0.6
Scaled Resolution [#] (px,py,slice)	512	512	64
Scaled Resolution [mm] (px,py,slice)	0.1367	0.1367	0.6
Mask XY/Axial Plane ROI points	[214 196 100 100]	Mask XY/Axial Plane ROI slice #	39
Mask XZ/Sagittal Plane ROI points	[1 1 1 1]	Mask XZ/Sagittal Plane ROI slice #	1
Mask YZ/Coronal Plane ROI points	[1 1 1 1]	Mask YZ/Coronal Plane ROI slice #	1

## Sheet: EXP3-12-070
Order	Volume mm3	Surface mm2
PCT_DYNMULTI_0_6_H40F_1_0002	519.099	267.721
PCT_DYNMULTI_0_6_H40F_2_0003	518.371	267.508
PCT_DYNMULTI_0_6_H40F_3_0004	518.191	267.482
PCT_DYNMULTI_0_6_H40F_4_0005	518.886	267.609
PCT_DYNMULTI_0_6_H40F_5_0006	519.66	267.892
PCT_DYNMULTI_0_6_H40F_6_0007	521.6	268.438
PCT_DYNMULTI_0_6_H40F_7_0008	523.853	269.424
PCT_DYNMULTI_0_6_H40F_8_0009	525.154	269.923
PCT_DYNMULTI_0_6_H40F_9_0010	525.692	270.037
PCT_DYNMULTI_0_6_H40F_10_0011	525.367	269.963
PCT_DYNMULTI_0_6_H40F_11_0012	524.818	269.775
PCT_DYNMULTI_0_6_H40F_12_0013	523.36	269.4
PCT_DYNMULTI_0_6_H40F_13_0014	521.196	268.542
PCT_DYNMULTI_0_6_H40F_14_0015	519.75	267.991
PCT_DYNMULTI_0_6_H40F_15_0016	518.651	267.578
PCT_DYNMULTI_0_6_H40F_16_0017	518.326	267.517
PCT_DYNMULTI_0_6_H40F_17_0018	518.404	267.44
PCT_DYNMULTI_0_6_H40F_18_0019	519.525	268.018
PCT_DYNMULTI_0_6_H40F_19_0020	521.084	268.462
PCT_DYNMULTI_0_6_H40F_20_0021	522.743	269.07
PCT_DYNMULTI_0_6_H40F_21_0022	524.291	269.678
PCT_DYNMULTI_0_6_H40F_22_0023	525.266	270.022
PCT_DYNMULTI_0_6_H40F_23_0024	525.389	269.999
PCT_DYNMULTI_0_6_H40F_24_0025	524.907	269.927
PCT_DYNMULTI_0_6_H40F_25_0026	523.461	269.378
PCT_DYNMULTI_0_6_H40F_26_0027	522.071	268.82
PCT_DYNMULTI_0_6_H40F_27_0028	519.974	268.237
PCT_DYNMULTI_0_6_H40F_28_0029	518.404	267.499
PCT_DYNMULTI_0_6_H40F_29_0030	517.911	267.297
PCT_DYNMULTI_0_6_H40F_30_0031	517.978	267.318
PCT_DYNMULTI_0_6_H40F_31_0032	518.976	267.708
PCT_DYNMULTI_0_6_H40F_32_0033	519.929	268.191
PCT_DYNMULTI_0_6_H40F_33_0034	522.194	268.938
PCT_DYNMULTI_0_6_H40F_34_0035	524.089	269.661
PCT_DYNMULTI_0_6_H40F_35_0036	525.188	270.235
PCT_DYNMULTI_0_6_H40F_36_0037	525.614	270.444
PCT_DYNMULTI_0_6_H40F_37_0038	525.154	270.207
PCT_DYNMULTI_0_6_H40F_38_0039	524.201	269.586
PCT_DYNMULTI_0_6_H40F_39_0040	522.676	269.118
PCT_DYNMULTI_0_6_H40F_40_0041	520.456	268.268
PCT_DYNMULTI_0_6_H40F_41_0042	519.032	267.985
PCT_DYNMULTI_0_6_H40F_42_0043	518.169	267.646
PCT_DYNMULTI_0_6_H40F_43_0044	518.057	267.606
PCT_DYNMULTI_0_6_H40F_44_0045	518.483	267.647
PCT_DYNMULTI_0_6_H40F_45_0046	520.03	268.314
PCT_DYNMULTI_0_6_H40F_46_0047	521.835	268.971
PCT_DYNMULTI_0_6_H40F_47_0048	523.382	269.599
PCT_DYNMULTI_0_6_H40F_48_0049	524.739	269.987
PCT_DYNMULTI_0_6_H40F_49_0050	525.277	270.187
PCT_DYNMULTI_0_6_H40F_50_0051	525.3	270.146
PCT_DYNMULTI_0_6_H40F_51_0052	524.481	269.844
PCT_DYNMULTI_0_6_H40F_52_0053	523.057	269.363
PCT_DYNMULTI_0_6_H40F_53_0054	521.465	268.716
PCT_DYNMULTI_0_6_H40F_54_0055	519.503	268.262
PCT_DYNMULTI_0_6_H40F_55_0056	518.135	267.661
PCT_DYNMULTI_0_6_H40F_56_0057	517.911	267.582
PCT_DYNMULTI_0_6_H40F_57_0058	518.348	267.83
PCT_DYNMULTI_0_6_H40F_58_0059	519.346	268.036
PCT_DYNMULTI_0_6_H40F_59_0060	520.322	268.357
PCT_DYNMULTI_0_6_H40F_60_0061	522.598	269.1
PCT_DYNMULTI_0_6_H40F_61_0062	524.47	269.626
PCT_DYNMULTI_0_6_H40F_62_0063	525.165	270.047
PCT_DYNMULTI_0_6_H40F_63_0064	525.255	270.087
PCT_DYNMULTI_0_6_H40F_64_0065	524.896	269.965
PCT_DYNMULTI_0_6_H40F_65_0066	523.977	269.455
PCT_DYNMULTI_0_6_H40F_66_0067	522.115	268.998
PCT_DYNMULTI_0_6_H40F_67_0068	520.075	268.241
PCT_DYNMULTI_0_6_H40F_68_0069	518.987	267.904
PCT_DYNMULTI_0_6_H40F_69_0070	518.348	267.716
PCT_DYNMULTI_0_6_H40F_70_0071	518.415	267.685
PCT_DYNMULTI_0_6_H40F_71_0072	519.066	268.079
PCT_DYNMULTI_0_6_H40F_72_0073	520.781	268.512
PCT_DYNMULTI_0_6_H40F_73_0074	522.676	269.066
PCT_DYNMULTI_0_6_H40F_74_0075	524.156	269.803
PCT_DYNMULTI_0_6_H40F_75_0076	525.075	270.082
PCT_DYNMULTI_0_6_H40F_76_0077	525.389	270.29
PCT_DYNMULTI_0_6_H40F_77_0078	525.143	270.051
PCT_DYNMULTI_0_6_H40F_78_0079	524.066	269.768
PCT_DYNMULTI_0_6_H40F_79_0080	522.418	269.066
PCT_DYNMULTI_0_6_H40F_80_0081	521.005	268.62
PCT_DYNMULTI_0_6_H40F_81_0082	519.436	268.222
PCT_DYNMULTI_0_6_H40F_82_0083	518.326	267.733
PCT_DYNMULTI_0_6_H40F_83_0084	518.326	267.829
PCT_DYNMULTI_0_6_H40F_84_0085	518.92	267.846
PCT_DYNMULTI_0_6_H40F_85_0086	520.299	268.506
PCT_DYNMULTI_0_6_H40F_86_0087	521.51	268.805
PCT_DYNMULTI_0_6_H40F_87_0088	523.663	269.613
PCT_DYNMULTI_0_6_H40F_88_0089	525.232	270.211
PCT_DYNMULTI_0_6_H40F_89_0090	525.782	270.337
PCT_DYNMULTI_0_6_H40F_90_0091	525.681	270.365
PCT_DYNMULTI_0_6_H40F_91_0092	524.851	270.023
PCT_DYNMULTI_0_6_H40F_92_0093	523.842	269.696
PCT_DYNMULTI_0_6_H40F_93_0094	521.544	268.932
PCT_DYNMULTI_0_6_H40F_94_0095	519.615	268.073
Patient Name	EXP3-12-070
Patient ID	24.11.15-17:59:25-STD-1.3.12.2.1107.5.1.4.64279
Set constrast treshold [min] [max]	399	400
Resolution [#] (px,py,slice)	512	512	64
Resolution [mm] (px,py,slice)	0.1367	0.1367	0.6
Scaled Resolution [#] (px,py,slice)	512	512	64
Scaled Resolution [mm] (px,py,slice)	0.1367	0.1367	0.6
Mask XY/Axial Plane ROI points	[214 181 100 100]	Mask XY/Axial Plane ROI slice #	39
Mask XZ/Sagittal Plane ROI points	[1 1 1 1]	Mask XZ/Sagittal Plane ROI slice #	1
Mask YZ/Coronal Plane ROI points	[1 1 1 1]	Mask YZ/Coronal Plane ROI slice #	1

## Sheet: EXP3-12-115
Order	Volume mm3	Surface mm2
PCT_DYNMULTI_0_6_H40F_1_0002	519.694	266.118
PCT_DYNMULTI_0_6_H40F_2_0003	520.871	266.641
PCT_DYNMULTI_0_6_H40F_3_0004	524.201	267.814
PCT_DYNMULTI_0_6_H40F_4_0005	527.307	269.024
PCT_DYNMULTI_0_6_H40F_5_0006	529.269	269.68
PCT_DYNMULTI_0_6_H40F_6_0007	530.401	270.133
PCT_DYNMULTI_0_6_H40F_7_0008	530.435	270.191
PCT_DYNMULTI_0_6_H40F_8_0009	529.818	270.059
PCT_DYNMULTI_0_6_H40F_9_0010	527.52	269.222
PCT_DYNMULTI_0_6_H40F_10_0011	524.033	267.986
PCT_DYNMULTI_0_6_H40F_11_0012	521.947	267.108
PCT_DYNMULTI_0_6_H40F_12_0013	519.828	266.448
PCT_DYNMULTI_0_6_H40F_13_0014	519.178	266.325
PCT_DYNMULTI_0_6_H40F_14_0015	519.357	266.415
PCT_DYNMULTI_0_6_H40F_15_0016	520.759	266.611
PCT_DYNMULTI_0_6_H40F_16_0017	523.225	267.2
PCT_DYNMULTI_0_6_H40F_17_0018	525.86	268.045
PCT_DYNMULTI_0_6_H40F_18_0019	528.562	269.149
PCT_DYNMULTI_0_6_H40F_19_0020	530.155	269.687
PCT_DYNMULTI_0_6_H40F_20_0021	530.401	269.812
PCT_DYNMULTI_0_6_H40F_21_0022	529.975	269.527
PCT_DYNMULTI_0_6_H40F_22_0023	528.551	269.052
PCT_DYNMULTI_0_6_H40F_23_0024	526.432	268.279
PCT_DYNMULTI_0_6_H40F_24_0025	522.855	267.36
PCT_DYNMULTI_0_6_H40F_25_0026	520.512	266.267
PCT_DYNMULTI_0_6_H40F_26_0027	519.413	266.108
PCT_DYNMULTI_0_6_H40F_27_0028	519.29	265.962
PCT_DYNMULTI_0_6_H40F_28_0029	520.165	266.314
PCT_DYNMULTI_0_6_H40F_29_0030	521.622	266.795
PCT_DYNMULTI_0_6_H40F_30_0031	525.143	267.801
PCT_DYNMULTI_0_6_H40F_31_0032	528.518	269.228
PCT_DYNMULTI_0_6_H40F_32_0033	529.874	269.46
PCT_DYNMULTI_0_6_H40F_33_0034	530.424	269.808
PCT_DYNMULTI_0_6_H40F_34_0035	530.042	269.732
PCT_DYNMULTI_0_6_H40F_35_0036	529.314	269.46
PCT_DYNMULTI_0_6_H40F_36_0037	526.387	268.538
PCT_DYNMULTI_0_6_H40F_37_0038	522.99	267.31
PCT_DYNMULTI_0_6_H40F_38_0039	520.893	266.471
PCT_DYNMULTI_0_6_H40F_39_0040	519.256	265.738
PCT_DYNMULTI_0_6_H40F_40_0041	518.785	265.831
PCT_DYNMULTI_0_6_H40F_41_0042	519.021	266.023
PCT_DYNMULTI_0_6_H40F_42_0043	520.949	266.676
PCT_DYNMULTI_0_6_H40F_43_0044	523.898	267.61
PCT_DYNMULTI_0_6_H40F_44_0045	526.432	268.539
PCT_DYNMULTI_0_6_H40F_45_0046	528.944	269.218
PCT_DYNMULTI_0_6_H40F_46_0047	530.233	269.598
PCT_DYNMULTI_0_6_H40F_47_0048	530.3	269.542
PCT_DYNMULTI_0_6_H40F_48_0049	529.527	269.281
PCT_DYNMULTI_0_6_H40F_49_0050	527.43	268.702
PCT_DYNMULTI_0_6_H40F_50_0051	524.829	267.776
PCT_DYNMULTI_0_6_H40F_51_0052	521.768	266.44
PCT_DYNMULTI_0_6_H40F_52_0053	519.57	265.672
PCT_DYNMULTI_0_6_H40F_53_0054	518.808	265.492
PCT_DYNMULTI_0_6_H40F_54_0055	518.976	265.685
PCT_DYNMULTI_0_6_H40F_55_0056	520.209	265.843
PCT_DYNMULTI_0_6_H40F_56_0057	521.891	266.5
PCT_DYNMULTI_0_6_H40F_57_0058	525.468	267.789
PCT_DYNMULTI_0_6_H40F_58_0059	528.204	248.623
PCT_DYNMULTI_0_6_H40F_59_0060	529.392	269.282
PCT_DYNMULTI_0_6_H40F_60_0061	529.818	269.379
PCT_DYNMULTI_0_6_H40F_61_0062	529.426	269.313
PCT_DYNMULTI_0_6_H40F_62_0063	528.484	268.848
PCT_DYNMULTI_0_6_H40F_63_0064	525.165	267.765
PCT_DYNMULTI_0_6_H40F_64_0065	521.981	266.742
PCT_DYNMULTI_0_6_H40F_65_0066	520.153	265.971
PCT_DYNMULTI_0_6_H40F_66_0067	518.696	265.553
PCT_DYNMULTI_0_6_H40F_67_0068	518.494	265.441
PCT_DYNMULTI_0_6_H40F_68_0069	518.83	265.6
PCT_DYNMULTI_0_6_H40F_69_0070	521.409	266.553
PCT_DYNMULTI_0_6_H40F_70_0071	524.246	267.25
PCT_DYNMULTI_0_6_H40F_71_0072	526.544	268.37
PCT_DYNMULTI_0_6_H40F_72_0073	528.618	268.966
PCT_DYNMULTI_0_6_H40F_73_0074	529.493	269.074
PCT_DYNMULTI_0_6_H40F_74_0075	529.415	269.12
PCT_DYNMULTI_0_6_H40F_75_0076	528.192	268.765
PCT_DYNMULTI_0_6_H40F_76_0077	525.838	267.976
PCT_DYNMULTI_0_6_H40F_77_0078	523.27	267.065
PCT_DYNMULTI_0_6_H40F_78_0079	520.333	266.12
PCT_DYNMULTI_0_6_H40F_79_0080	518.819	265.742
PCT_DYNMULTI_0_6_H40F_80_0081	518.595	265.752
PCT_DYNMULTI_0_6_H40F_81_0082	519.088	265.952
PCT_DYNMULTI_0_6_H40F_82_0083	520.848	266.621
PCT_DYNMULTI_0_6_H40F_83_0084	523.136	267.371
PCT_DYNMULTI_0_6_H40F_84_0085	526.589	268.546
PCT_DYNMULTI_0_6_H40F_85_0086	528.977	269.328
PCT_DYNMULTI_0_6_H40F_86_0087	529.863	269.62
PCT_DYNMULTI_0_6_H40F_87_0088	530.155	269.735
PCT_DYNMULTI_0_6_H40F_88_0089	529.246	269.493
PCT_DYNMULTI_0_6_H40F_89_0090	528.047	268.958
PCT_DYNMULTI_0_6_H40F_90_0091	524.358	267.811
PCT_DYNMULTI_0_6_H40F_91_0092	521.095	266.706
PCT_DYNMULTI_0_6_H40F_92_0093	519.615	265.98
PCT_DYNMULTI_0_6_H40F_93_0094	518.718	265.759
PCT_DYNMULTI_0_6_H40F_94_0095	518.976	265.877
Patient Name	EXP3-12-115
Patient ID	24.11.15-18:01:02-STD-1.3.12.2.1107.5.1.4.64279
Set constrast treshold [min] [max]	399	400
Resolution [#] (px,py,slice)	512	512	64
Resolution [mm] (px,py,slice)	0.1367	0.1367	0.6
Scaled Resolution [#] (px,py,slice)	512	512	64
Scaled Resolution [mm] (px,py,slice)	0.1367	0.1367	0.6
Mask XY/Axial Plane ROI points	[214 189 100 100]	Mask XY/Axial Plane ROI slice #	39
Mask XZ/Sagittal Plane ROI points	[1 1 1 1]	Mask XZ/Sagittal Plane ROI slice #	1
Mask YZ/Coronal Plane ROI points	[1 1 1 1]	Mask YZ/Coronal Plane ROI slice #	1

## Sheet: EXP3-12-195
Order	Volume mm3	Surface mm2
PCT_DYNMULTI_0_6_H40F_1_0002	532.262	273.454
PCT_DYNMULTI_0_6_H40F_2_0003	534.191	274.247
PCT_DYNMULTI_0_6_H40F_3_0004	534.382	274.254
PCT_DYNMULTI_0_6_H40F_4_0005	533.115	273.825
PCT_DYNMULTI_0_6_H40F_5_0006	528.585	272.331
PCT_DYNMULTI_0_6_H40F_6_0007	523.808	270.78
PCT_DYNMULTI_0_6_H40F_7_0008	520.837	269.921
PCT_DYNMULTI_0_6_H40F_8_0009	516.913	268.417
PCT_DYNMULTI_0_6_H40F_9_0010	515.747	268.226
PCT_DYNMULTI_0_6_H40F_10_0011	516.016	268.373
PCT_DYNMULTI_0_6_H40F_11_0012	519.01	269.655
PCT_DYNMULTI_0_6_H40F_12_0013	523.147	270.547
PCT_DYNMULTI_0_6_H40F_13_0014	527.217	271.87
PCT_DYNMULTI_0_6_H40F_14_0015	531.702	273.389
PCT_DYNMULTI_0_6_H40F_15_0016	533.843	274.039
PCT_DYNMULTI_0_6_H40F_16_0017	534.337	274.268
PCT_DYNMULTI_0_6_H40F_17_0018	533.597	274.026
PCT_DYNMULTI_0_6_H40F_18_0019	530.625	272.929
PCT_DYNMULTI_0_6_H40F_19_0020	526.836	271.975
PCT_DYNMULTI_0_6_H40F_20_0021	521.23	269.891
PCT_DYNMULTI_0_6_H40F_21_0022	518.068	269.067
PCT_DYNMULTI_0_6_H40F_22_0023	516.666	268.652
PCT_DYNMULTI_0_6_H40F_23_0024	516.319	268.475
PCT_DYNMULTI_0_6_H40F_24_0025	517.765	268.971
PCT_DYNMULTI_0_6_H40F_25_0026	521.162	269.919
PCT_DYNMULTI_0_6_H40F_26_0027	527.239	272.137
PCT_DYNMULTI_0_6_H40F_27_0028	531.354	273.356
PCT_DYNMULTI_0_6_H40F_28_0029	533.171	273.894
PCT_DYNMULTI_0_6_H40F_29_0030	534.628	274.397
PCT_DYNMULTI_0_6_H40F_30_0031	534.292	274.262
PCT_DYNMULTI_0_6_H40F_31_0032	532.307	273.602
PCT_DYNMULTI_0_6_H40F_32_0033	526.892	271.553
PCT_DYNMULTI_0_6_H40F_33_0034	522.228	270.197
PCT_DYNMULTI_0_6_H40F_34_0035	519.481	269.67
PCT_DYNMULTI_0_6_H40F_35_0036	516.229	268.336
PCT_DYNMULTI_0_6_H40F_36_0037	515.657	268.375
PCT_DYNMULTI_0_6_H40F_37_0038	516.42	268.602
PCT_DYNMULTI_0_6_H40F_38_0039	520.31	270.004
PCT_DYNMULTI_0_6_H40F_39_0040	525.12	271.306
PCT_DYNMULTI_0_6_H40F_40_0041	528.775	272.534
PCT_DYNMULTI_0_6_H40F_41_0042	532.554	273.692
PCT_DYNMULTI_0_6_H40F_42_0043	533.967	273.977
PCT_DYNMULTI_0_6_H40F_43_0044	534.034	274.05
PCT_DYNMULTI_0_6_H40F_44_0045	532.588	273.526
PCT_DYNMULTI_0_6_H40F_45_0046	528.966	272.509
PCT_DYNMULTI_0_6_H40F_46_0047	525.176	271.206
PCT_DYNMULTI_0_6_H40F_47_0048	519.996	269.446
PCT_DYNMULTI_0_6_H40F_48_0049	517.361	268.836
PCT_DYNMULTI_0_6_H40F_49_0050	516.633	268.667
PCT_DYNMULTI_0_6_H40F_50_0051	516.846	268.603
PCT_DYNMULTI_0_6_H40F_51_0052	518.853	269.161
PCT_DYNMULTI_0_6_H40F_52_0053	522.945	270.319
PCT_DYNMULTI_0_6_H40F_53_0054	528.697	272.536
PCT_DYNMULTI_0_6_H40F_54_0055	532.195	273.492
PCT_DYNMULTI_0_6_H40F_55_0056	533.72	273.937
PCT_DYNMULTI_0_6_H40F_56_0057	534.337	274.185
PCT_DYNMULTI_0_6_H40F_57_0058	533.585	273.979
PCT_DYNMULTI_0_6_H40F_58_0059	530.782	273.111
PCT_DYNMULTI_0_6_H40F_59_0060	525.075	270.753
PCT_DYNMULTI_0_6_H40F_60_0061	520.949	269.77
PCT_DYNMULTI_0_6_H40F_61_0062	518.102	268.911
PCT_DYNMULTI_0_6_H40F_62_0063	515.814	268.024
PCT_DYNMULTI_0_6_H40F_63_0064	515.422	268.078
PCT_DYNMULTI_0_6_H40F_64_0065	517.048	268.505
PCT_DYNMULTI_0_6_H40F_65_0066	521.835	270.367
PCT_DYNMULTI_0_6_H40F_66_0067	526.499	271.732
PCT_DYNMULTI_0_6_H40F_67_0068	529.841	272.769
PCT_DYNMULTI_0_6_H40F_68_0069	533.014	273.952
PCT_DYNMULTI_0_6_H40F_69_0070	534.18	274.19
PCT_DYNMULTI_0_6_H40F_70_0071	533.731	274.091
PCT_DYNMULTI_0_6_H40F_71_0072	531.59	273.328
PCT_DYNMULTI_0_6_H40F_72_0073	527.587	272.001
PCT_DYNMULTI_0_6_H40F_73_0074	523.629	270.926
PCT_DYNMULTI_0_6_H40F_74_0075	518.909	269.155
PCT_DYNMULTI_0_6_H40F_75_0076	516.678	268.72
PCT_DYNMULTI_0_6_H40F_76_0077	516.207	268.352
PCT_DYNMULTI_0_6_H40F_77_0078	517.115	268.739
PCT_DYNMULTI_0_6_H40F_78_0079	519.716	269.3
PCT_DYNMULTI_0_6_H40F_79_0080	524.515	270.929
PCT_DYNMULTI_0_6_H40F_80_0081	529.807	272.961
PCT_DYNMULTI_0_6_H40F_81_0082	532.677	273.8
PCT_DYNMULTI_0_6_H40F_82_0083	533.731	274.015
PCT_DYNMULTI_0_6_H40F_83_0084	533.911	274.05
PCT_DYNMULTI_0_6_H40F_84_0085	532.745	273.732
PCT_DYNMULTI_0_6_H40F_85_0086	528.888	272.356
PCT_DYNMULTI_0_6_H40F_86_0087	523.012	270.544
PCT_DYNMULTI_0_6_H40F_87_0088	519.458	269.532
PCT_DYNMULTI_0_6_H40F_88_0089	516.891	268.861
PCT_DYNMULTI_0_6_H40F_89_0090	515.556	268.086
PCT_DYNMULTI_0_6_H40F_90_0091	515.758	268.26
PCT_DYNMULTI_0_6_H40F_91_0092	518.247	269.036
PCT_DYNMULTI_0_6_H40F_92_0093	524.033	270.971
PCT_DYNMULTI_0_6_H40F_93_0094	528.439	272.117
PCT_DYNMULTI_0_6_H40F_94_0095	531.623	273.291
Patient Name	EXP3-12-195
Patient ID	24.11.15-18:02:50-STD-1.3.12.2.1107.5.1.4.64279
Set constrast treshold [min] [max]	399	400
Resolution [#] (px,py,slice)	512	512	64
Resolution [mm] (px,py,slice)	0.1367	0.1367	0.6
Scaled Resolution [#] (px,py,slice)	512	512	64
Scaled Resolution [mm] (px,py,slice)	0.1367	0.1367	0.6
Mask XY/Axial Plane ROI points	[214 196 100 100]	Mask XY/Axial Plane ROI slice #	39
Mask XZ/Sagittal Plane ROI points	[1 1 1 1]	Mask XZ/Sagittal Plane ROI slice #	1
Mask YZ/Coronal Plane ROI points	[1 1 1 1]	Mask YZ/Coronal Plane ROI slice #	1

[truncated: 16 more sheets: EXP3-12-270, EXP3-25-000, EXP3-25-070, EXP3-25-115, EXP3-25-195B, EXP3-25-270, EXP3-50-000, EXP3-50-070, EXP3-50-115, EXP3-50-195, EXP3-50-270, EXP3-70-000, EXP3-70-070, EXP3-70-115, EXP3-70-195, EXP3-70-270]
