# Supplementary material for: Intracranial aneurysms: in vitro study of “intracranial” pressure and parent vessel curvature as potential modifiers of aneurysm pulsation amplitude
Source: Research Square preprint supplement (doi:10.21203/rs.3.rs-8211535/v1), 2026-02-20
Supplement: Supplementary file 2 [file 562601beb51b12c012d304bb.xlsx]

## Sheet: Legend
Order	Each CT scanner reconstructed volume in chronologic order (each "frame" is 50ms)
Volume	Aneurysm model volume in mm3
Surface	Aneurysm wall surface in mm²
Naming convention	…-XXX-YY - XXX = external pressure in the chamber in mmHg - YY = pulse pump voltage, value should be divided by 10 (e.g. 10 = 1.0V)
Due to a first experiment having been erronately made with different conditions, this is experiment nr 1 and not 2

## Sheet: EXPII-000-00
Order	Volume mm3	Surface mm2					Min-Min
PCT_DYNMULTI_0_6_H40F_1_0002	544.147	280.524
PCT_DYNMULTI_0_6_H40F_2_0003	544.147	280.475		Moyenne volume		543.957		Moyenne	SD	CoV	relative	rel%	SD rel%	COV
PCT_DYNMULTI_0_6_H40F_3_0004	544.058	280.397		544.313		544.282	0.297122	0.264419	0.0898663	0.339862	0.000485786	0.0485786	0.01651	0.339862
PCT_DYNMULTI_0_6_H40F_4_0005	543.957	280.281		Mediane volume		544.013
PCT_DYNMULTI_0_6_H40F_5_0006	543.99	280.416		544.327		544.506	0.398031
PCT_DYNMULTI_0_6_H40F_6_0007	544.024	280.438				544.203
PCT_DYNMULTI_0_6_H40F_7_0008	544.125	280.435				544.428	0.207424
PCT_DYNMULTI_0_6_H40F_8_0009	544.125	280.434				544.237
PCT_DYNMULTI_0_6_H40F_9_0010	544.203	280.508				544.416	0.173788
PCT_DYNMULTI_0_6_H40F_10_0011	544.282	280.523				544.248
PCT_DYNMULTI_0_6_H40F_11_0012	544.215	280.452				544.596	0.325152
PCT_DYNMULTI_0_6_H40F_12_0013	544.215	280.392				544.293
PCT_DYNMULTI_0_6_H40F_13_0014	544.136	280.422				544.45	0.185
PCT_DYNMULTI_0_6_H40F_14_0015	544.114	280.503				544.237
PCT_DYNMULTI_0_6_H40F_15_0016	544.091	280.462				544.607	0.353182
PCT_DYNMULTI_0_6_H40F_16_0017	544.058	280.44				544.271
PCT_DYNMULTI_0_6_H40F_17_0018	544.013	280.365
PCT_DYNMULTI_0_6_H40F_18_0019	544.046	280.442
PCT_DYNMULTI_0_6_H40F_19_0020	544.046	280.4
PCT_DYNMULTI_0_6_H40F_20_0021	544.091	280.368
PCT_DYNMULTI_0_6_H40F_21_0022	544.136	280.393
PCT_DYNMULTI_0_6_H40F_22_0023	544.293	280.584
PCT_DYNMULTI_0_6_H40F_23_0024	544.36	280.533
PCT_DYNMULTI_0_6_H40F_24_0025	544.394	280.659
PCT_DYNMULTI_0_6_H40F_25_0026	544.472	280.592
PCT_DYNMULTI_0_6_H40F_26_0027	544.506	280.833
PCT_DYNMULTI_0_6_H40F_27_0028	544.461	280.667
PCT_DYNMULTI_0_6_H40F_28_0029	544.349	280.67
PCT_DYNMULTI_0_6_H40F_29_0030	544.372	280.61
PCT_DYNMULTI_0_6_H40F_30_0031	544.237	280.566
PCT_DYNMULTI_0_6_H40F_31_0032	544.203	280.566
PCT_DYNMULTI_0_6_H40F_32_0033	544.226	280.64
PCT_DYNMULTI_0_6_H40F_33_0034	544.282	280.643
PCT_DYNMULTI_0_6_H40F_34_0035	544.327	280.625
PCT_DYNMULTI_0_6_H40F_35_0036	544.383	280.745
PCT_DYNMULTI_0_6_H40F_36_0037	544.428	280.73
PCT_DYNMULTI_0_6_H40F_37_0038	544.383	280.674
PCT_DYNMULTI_0_6_H40F_38_0039	544.36	280.619
PCT_DYNMULTI_0_6_H40F_39_0040	544.372	280.707
PCT_DYNMULTI_0_6_H40F_40_0041	544.315	280.685
PCT_DYNMULTI_0_6_H40F_41_0042	544.304	280.69
PCT_DYNMULTI_0_6_H40F_42_0043	544.36	280.755
PCT_DYNMULTI_0_6_H40F_43_0044	544.315	280.793
PCT_DYNMULTI_0_6_H40F_44_0045	544.237	280.755
PCT_DYNMULTI_0_6_H40F_45_0046	544.237	280.644
PCT_DYNMULTI_0_6_H40F_46_0047	544.327	280.731
PCT_DYNMULTI_0_6_H40F_47_0048	544.304	280.67
PCT_DYNMULTI_0_6_H40F_48_0049	544.405	280.699
PCT_DYNMULTI_0_6_H40F_49_0050	544.416	280.684
PCT_DYNMULTI_0_6_H40F_50_0051	544.394	280.684
PCT_DYNMULTI_0_6_H40F_51_0052	544.271	280.669
PCT_DYNMULTI_0_6_H40F_52_0053	544.248	280.695
PCT_DYNMULTI_0_6_H40F_53_0054	544.282	280.653
PCT_DYNMULTI_0_6_H40F_54_0055	544.271	280.688
PCT_DYNMULTI_0_6_H40F_55_0056	544.372	280.714
PCT_DYNMULTI_0_6_H40F_56_0057	544.439	280.77
PCT_DYNMULTI_0_6_H40F_57_0058	544.573	280.945
PCT_DYNMULTI_0_6_H40F_58_0059	544.484	280.745
PCT_DYNMULTI_0_6_H40F_59_0060	544.596	280.77
PCT_DYNMULTI_0_6_H40F_60_0061	544.472	280.737
PCT_DYNMULTI_0_6_H40F_61_0062	544.405	280.674
PCT_DYNMULTI_0_6_H40F_62_0063	544.484	280.771
PCT_DYNMULTI_0_6_H40F_63_0064	544.461	280.737
PCT_DYNMULTI_0_6_H40F_64_0065	544.472	280.853
PCT_DYNMULTI_0_6_H40F_65_0066	544.383	280.741
PCT_DYNMULTI_0_6_H40F_66_0067	544.372	280.741
PCT_DYNMULTI_0_6_H40F_67_0068	544.327	280.737
PCT_DYNMULTI_0_6_H40F_68_0069	544.293	280.734
PCT_DYNMULTI_0_6_H40F_69_0070	544.293	280.699
PCT_DYNMULTI_0_6_H40F_70_0071	544.338	280.789
PCT_DYNMULTI_0_6_H40F_71_0072	544.45	280.883
PCT_DYNMULTI_0_6_H40F_72_0073	544.405	280.863
PCT_DYNMULTI_0_6_H40F_73_0074	544.327	280.815
PCT_DYNMULTI_0_6_H40F_74_0075	544.237	280.865
PCT_DYNMULTI_0_6_H40F_75_0076	544.237	281.015
PCT_DYNMULTI_0_6_H40F_76_0077	544.237	280.756
PCT_DYNMULTI_0_6_H40F_77_0078	544.293	280.647
PCT_DYNMULTI_0_6_H40F_78_0079	544.372	280.637
PCT_DYNMULTI_0_6_H40F_79_0080	544.461	280.622
PCT_DYNMULTI_0_6_H40F_80_0081	544.607	280.698
PCT_DYNMULTI_0_6_H40F_81_0082	544.596	280.788
PCT_DYNMULTI_0_6_H40F_82_0083	544.528	280.761
PCT_DYNMULTI_0_6_H40F_83_0084	544.495	280.753
PCT_DYNMULTI_0_6_H40F_84_0085	544.394	280.75
PCT_DYNMULTI_0_6_H40F_85_0086	544.338	280.757
PCT_DYNMULTI_0_6_H40F_86_0087	544.338	280.839
PCT_DYNMULTI_0_6_H40F_87_0088	544.271	280.76
PCT_DYNMULTI_0_6_H40F_88_0089	544.304	280.701
PCT_DYNMULTI_0_6_H40F_89_0090	544.372	280.716
PCT_DYNMULTI_0_6_H40F_90_0091	544.383	280.82
PCT_DYNMULTI_0_6_H40F_91_0092	544.428	280.873
PCT_DYNMULTI_0_6_H40F_92_0093	544.439	280.753
PCT_DYNMULTI_0_6_H40F_93_0094	544.45	280.761
PCT_DYNMULTI_0_6_H40F_94_0095	544.45	280.784
Patient Name	EXPII-000-00
Patient ID	22.08.26-18:25:26-DST-1.3.12.2.1107.5.1.4.64279
Set constrast treshold [min] [max]	399	400
Resolution [#] (px,py,slice)	512	512	64
Resolution [mm] (px,py,slice)	0.1367	0.1367	0.6
Scaled Resolution [#] (px,py,slice)	512	512	64
Scaled Resolution [mm] (px,py,slice)	0.1367	0.1367	0.6
Mask XY/Axial Plane ROI points	[204 187 100 100]	Mask XY/Axial Plane ROI slice #	46
Mask XZ/Sagittal Plane ROI points	[1 1 1 1]	Mask XZ/Sagittal Plane ROI slice #	1
Mask YZ/Coronal Plane ROI points	[1 1 1 1]	Mask YZ/Coronal Plane ROI slice #	1

## Sheet: EXPII-012-00
Order	Volume mm3	Surface mm2					Min-Min
PCT_DYNMULTI_0_6_H40F_1_0002	559.586	274.422
PCT_DYNMULTI_0_6_H40F_2_0003	559.441	274.497		Moyenne volume		559.441		Moyenne	SD	CoV	relative	rel%	SD rel%	COV
PCT_DYNMULTI_0_6_H40F_3_0004	559.452	274.483		559.767		559.777	0.241061	0.364394	0.135801	0.372676	0.000650975	0.0650975	0.0242603	0.372676
PCT_DYNMULTI_0_6_H40F_4_0005	559.497	274.446		Mediane volume		559.631
PCT_DYNMULTI_0_6_H40F_5_0006	559.553	274.463		559.738		559.788	0.235455
PCT_DYNMULTI_0_6_H40F_6_0007	559.642	274.627				559.474
PCT_DYNMULTI_0_6_H40F_7_0008	559.743	274.884				559.99	0.510152
PCT_DYNMULTI_0_6_H40F_8_0009	559.721	274.836				559.485
PCT_DYNMULTI_0_6_H40F_9_0010	559.777	275.158				560.069	0.420455
PCT_DYNMULTI_0_6_H40F_10_0011	559.699	274.758				559.811
PCT_DYNMULTI_0_6_H40F_11_0012	559.631	274.536				559.934	0.257879
PCT_DYNMULTI_0_6_H40F_12_0013	559.665	274.453				559.542
PCT_DYNMULTI_0_6_H40F_13_0014	559.71	274.562				560.069	0.521364
PCT_DYNMULTI_0_6_H40F_14_0015	559.676	274.439				559.553
PCT_DYNMULTI_0_6_H40F_15_0016	559.665	274.456
PCT_DYNMULTI_0_6_H40F_16_0017	559.71	274.412
PCT_DYNMULTI_0_6_H40F_17_0018	559.665	274.393
PCT_DYNMULTI_0_6_H40F_18_0019	559.654	274.416
PCT_DYNMULTI_0_6_H40F_19_0020	559.642	274.458
PCT_DYNMULTI_0_6_H40F_20_0021	559.665	274.793
PCT_DYNMULTI_0_6_H40F_21_0022	559.676	274.8
PCT_DYNMULTI_0_6_H40F_22_0023	559.631	274.793
PCT_DYNMULTI_0_6_H40F_23_0024	559.788	274.798
PCT_DYNMULTI_0_6_H40F_24_0025	559.777	274.422
PCT_DYNMULTI_0_6_H40F_25_0026	559.687	274.186
PCT_DYNMULTI_0_6_H40F_26_0027	559.474	274.122
PCT_DYNMULTI_0_6_H40F_27_0028	559.553	274.246
PCT_DYNMULTI_0_6_H40F_28_0029	559.564	274.181
PCT_DYNMULTI_0_6_H40F_29_0030	559.575	274.084
PCT_DYNMULTI_0_6_H40F_30_0031	559.665	274.729
PCT_DYNMULTI_0_6_H40F_31_0032	559.732	274.737
PCT_DYNMULTI_0_6_H40F_32_0033	559.9	274.744
PCT_DYNMULTI_0_6_H40F_33_0034	559.99	274.764
PCT_DYNMULTI_0_6_H40F_34_0035	559.934	274.797
PCT_DYNMULTI_0_6_H40F_35_0036	559.766	274.74
PCT_DYNMULTI_0_6_H40F_36_0037	559.586	274.513
PCT_DYNMULTI_0_6_H40F_37_0038	559.564	274.506
PCT_DYNMULTI_0_6_H40F_38_0039	559.485	274.555
PCT_DYNMULTI_0_6_H40F_39_0040	559.497	274.473
PCT_DYNMULTI_0_6_H40F_40_0041	559.53	274.615
PCT_DYNMULTI_0_6_H40F_41_0042	559.609	274.646
PCT_DYNMULTI_0_6_H40F_42_0043	559.699	274.688
PCT_DYNMULTI_0_6_H40F_43_0044	559.71	274.613
PCT_DYNMULTI_0_6_H40F_44_0045	559.799	274.612
PCT_DYNMULTI_0_6_H40F_45_0046	559.9	274.682
PCT_DYNMULTI_0_6_H40F_46_0047	559.923	274.589
PCT_DYNMULTI_0_6_H40F_47_0048	560.035	274.704
PCT_DYNMULTI_0_6_H40F_48_0049	560.035	274.746
PCT_DYNMULTI_0_6_H40F_49_0050	559.979	274.771
PCT_DYNMULTI_0_6_H40F_50_0051	560.069	274.839
PCT_DYNMULTI_0_6_H40F_51_0052	560.024	274.741
PCT_DYNMULTI_0_6_H40F_52_0053	559.979	274.625
PCT_DYNMULTI_0_6_H40F_53_0054	559.811	274.53
PCT_DYNMULTI_0_6_H40F_54_0055	559.855	274.589
PCT_DYNMULTI_0_6_H40F_55_0056	559.811	274.598
PCT_DYNMULTI_0_6_H40F_56_0057	559.878	274.609
PCT_DYNMULTI_0_6_H40F_57_0058	559.934	274.749
PCT_DYNMULTI_0_6_H40F_58_0059	559.923	274.817
PCT_DYNMULTI_0_6_H40F_59_0060	559.9	274.857
PCT_DYNMULTI_0_6_H40F_60_0061	559.844	274.842
PCT_DYNMULTI_0_6_H40F_61_0062	559.889	274.895
PCT_DYNMULTI_0_6_H40F_62_0063	559.923	274.787
PCT_DYNMULTI_0_6_H40F_63_0064	559.889	274.697
PCT_DYNMULTI_0_6_H40F_64_0065	559.844	274.595
PCT_DYNMULTI_0_6_H40F_65_0066	559.699	274.524
PCT_DYNMULTI_0_6_H40F_66_0067	559.676	274.463
PCT_DYNMULTI_0_6_H40F_67_0068	559.654	274.418
PCT_DYNMULTI_0_6_H40F_68_0069	559.542	274.492
PCT_DYNMULTI_0_6_H40F_69_0070	559.598	274.09
PCT_DYNMULTI_0_6_H40F_70_0071	559.665	273.994
PCT_DYNMULTI_0_6_H40F_71_0072	559.766	274.283
PCT_DYNMULTI_0_6_H40F_72_0073	559.71	274.165
PCT_DYNMULTI_0_6_H40F_73_0074	559.833	274.559
PCT_DYNMULTI_0_6_H40F_74_0075	559.968	274.69
PCT_DYNMULTI_0_6_H40F_75_0076	559.956	274.174
PCT_DYNMULTI_0_6_H40F_76_0077	559.99	274.46
PCT_DYNMULTI_0_6_H40F_77_0078	559.99	274.51
PCT_DYNMULTI_0_6_H40F_78_0079	560.069	274.518
PCT_DYNMULTI_0_6_H40F_79_0080	560.001	274.529
PCT_DYNMULTI_0_6_H40F_80_0081	559.99	274.503
PCT_DYNMULTI_0_6_H40F_81_0082	559.956	274.515
PCT_DYNMULTI_0_6_H40F_82_0083	559.968	274.518
PCT_DYNMULTI_0_6_H40F_83_0084	559.979	274.579
PCT_DYNMULTI_0_6_H40F_84_0085	559.956	274.553
PCT_DYNMULTI_0_6_H40F_85_0086	559.878	274.675
PCT_DYNMULTI_0_6_H40F_86_0087	559.721	274.573
PCT_DYNMULTI_0_6_H40F_87_0088	559.553	274.468
PCT_DYNMULTI_0_6_H40F_88_0089	559.642	274.563
PCT_DYNMULTI_0_6_H40F_89_0090	559.676	274.484
PCT_DYNMULTI_0_6_H40F_90_0091	559.732	274.604
PCT_DYNMULTI_0_6_H40F_91_0092	559.721	274.396
PCT_DYNMULTI_0_6_H40F_92_0093	559.822	274.584
PCT_DYNMULTI_0_6_H40F_93_0094	559.934	274.624
PCT_DYNMULTI_0_6_H40F_94_0095	559.878	274.524
Patient Name	EXPII-012-00
Patient ID	22.08.26-18:14:15-DST-1.3.12.2.1107.5.1.4.64279
Set constrast treshold [min] [max]	399	400
Resolution [#] (px,py,slice)	512	512	64
Resolution [mm] (px,py,slice)	0.1367	0.1367	0.6
Scaled Resolution [#] (px,py,slice)	512	512	64
Scaled Resolution [mm] (px,py,slice)	0.1367	0.1367	0.6
Mask XY/Axial Plane ROI points	[186 182 100 100]	Mask XY/Axial Plane ROI slice #	36
Mask XZ/Sagittal Plane ROI points	[1 1 1 1]	Mask XZ/Sagittal Plane ROI slice #	1
Mask YZ/Coronal Plane ROI points	[1 1 1 1]	Mask YZ/Coronal Plane ROI slice #	1

## Sheet: EXPII-025-00
Order	Volume mm3	Surface mm2					Max-Max
PCT_DYNMULTI_0_6_H40F_1_0002	562.659	273.578
PCT_DYNMULTI_0_6_H40F_2_0003	562.625	273.636		Moyenne volume		562.894		Moyenne	SD	CoV	relative	rel%	SD rel%	COV
PCT_DYNMULTI_0_6_H40F_3_0004	562.569	273.756		562.796		562.827	0.100909	0.233212	0.108315	0.464446	0.000414381	0.0414381	0.0192458	0.464446
PCT_DYNMULTI_0_6_H40F_4_0005	562.558	273.824		Mediane volume		562.961
PCT_DYNMULTI_0_6_H40F_5_0006	562.535	273.74		562.793		562.625	0.330758
PCT_DYNMULTI_0_6_H40F_6_0007	562.535	273.691				562.95
PCT_DYNMULTI_0_6_H40F_7_0008	562.49	273.54				562.681	0.257879
PCT_DYNMULTI_0_6_H40F_8_0009	562.445	273.526				562.928
PCT_DYNMULTI_0_6_H40F_9_0010	562.535	273.69				562.737	0.140152
PCT_DYNMULTI_0_6_H40F_10_0011	562.513	273.682				562.827
PCT_DYNMULTI_0_6_H40F_11_0012	562.535	273.645				562.602	0.336364
PCT_DYNMULTI_0_6_H40F_12_0013	562.614	273.56				563.051
PCT_DYNMULTI_0_6_H40F_13_0014	562.636	273.672
PCT_DYNMULTI_0_6_H40F_14_0015	562.692	273.625
PCT_DYNMULTI_0_6_H40F_15_0016	562.715	273.593
PCT_DYNMULTI_0_6_H40F_16_0017	562.726	273.453
PCT_DYNMULTI_0_6_H40F_17_0018	562.894	273.427
PCT_DYNMULTI_0_6_H40F_18_0019	562.849	273.307
PCT_DYNMULTI_0_6_H40F_19_0020	562.849	273.273
PCT_DYNMULTI_0_6_H40F_20_0021	562.838	273.389
PCT_DYNMULTI_0_6_H40F_21_0022	562.827	273.347
PCT_DYNMULTI_0_6_H40F_22_0023	562.961	273.557
PCT_DYNMULTI_0_6_H40F_23_0024	562.894	273.521
PCT_DYNMULTI_0_6_H40F_24_0025	562.939	273.561
PCT_DYNMULTI_0_6_H40F_25_0026	562.838	273.532
PCT_DYNMULTI_0_6_H40F_26_0027	562.86	273.447
PCT_DYNMULTI_0_6_H40F_27_0028	562.793	273.315
PCT_DYNMULTI_0_6_H40F_28_0029	562.692	273.292
PCT_DYNMULTI_0_6_H40F_29_0030	562.636	273.199
PCT_DYNMULTI_0_6_H40F_30_0031	562.625	273.209
PCT_DYNMULTI_0_6_H40F_31_0032	562.636	273.271
PCT_DYNMULTI_0_6_H40F_32_0033	562.647	273.301
PCT_DYNMULTI_0_6_H40F_33_0034	562.726	273.201
PCT_DYNMULTI_0_6_H40F_34_0035	562.759	273.182
PCT_DYNMULTI_0_6_H40F_35_0036	562.883	273.247
PCT_DYNMULTI_0_6_H40F_36_0037	562.939	273.237
PCT_DYNMULTI_0_6_H40F_37_0038	562.95	273.062
PCT_DYNMULTI_0_6_H40F_38_0039	562.95	273.222
PCT_DYNMULTI_0_6_H40F_39_0040	562.838	273.214
PCT_DYNMULTI_0_6_H40F_40_0041	562.872	273.254
PCT_DYNMULTI_0_6_H40F_41_0042	562.681	273.146
PCT_DYNMULTI_0_6_H40F_42_0043	562.748	273.213
PCT_DYNMULTI_0_6_H40F_43_0044	562.703	273.143
PCT_DYNMULTI_0_6_H40F_44_0045	562.759	273.108
PCT_DYNMULTI_0_6_H40F_45_0046	562.759	273.177
PCT_DYNMULTI_0_6_H40F_46_0047	562.793	273.376
PCT_DYNMULTI_0_6_H40F_47_0048	562.815	273.371
PCT_DYNMULTI_0_6_H40F_48_0049	562.872	273.401
PCT_DYNMULTI_0_6_H40F_49_0050	562.928	273.263
PCT_DYNMULTI_0_6_H40F_50_0051	562.883	273.222
PCT_DYNMULTI_0_6_H40F_51_0052	562.737	273.065
PCT_DYNMULTI_0_6_H40F_52_0053	562.759	273.035
PCT_DYNMULTI_0_6_H40F_53_0054	562.771	273.069
PCT_DYNMULTI_0_6_H40F_54_0055	562.737	273.028
PCT_DYNMULTI_0_6_H40F_55_0056	562.726	273.006
PCT_DYNMULTI_0_6_H40F_56_0057	562.827	273.127
PCT_DYNMULTI_0_6_H40F_57_0058	562.827	273.09
PCT_DYNMULTI_0_6_H40F_58_0059	562.815	273.079
PCT_DYNMULTI_0_6_H40F_59_0060	562.737	273.131
PCT_DYNMULTI_0_6_H40F_60_0061	562.659	273.141
PCT_DYNMULTI_0_6_H40F_61_0062	562.659	273.145
PCT_DYNMULTI_0_6_H40F_62_0063	562.737	273.238
PCT_DYNMULTI_0_6_H40F_63_0064	562.782	273.402
PCT_DYNMULTI_0_6_H40F_64_0065	562.827	273.286
PCT_DYNMULTI_0_6_H40F_65_0066	562.827	273.324
PCT_DYNMULTI_0_6_H40F_66_0067	562.748	273.418
PCT_DYNMULTI_0_6_H40F_67_0068	562.815	273.365
PCT_DYNMULTI_0_6_H40F_68_0069	562.827	273.38
PCT_DYNMULTI_0_6_H40F_69_0070	562.782	273.183
PCT_DYNMULTI_0_6_H40F_70_0071	562.748	273.286
PCT_DYNMULTI_0_6_H40F_71_0072	562.726	273.089
PCT_DYNMULTI_0_6_H40F_72_0073	562.715	272.913
PCT_DYNMULTI_0_6_H40F_73_0074	562.67	272.928
PCT_DYNMULTI_0_6_H40F_74_0075	562.602	272.825
PCT_DYNMULTI_0_6_H40F_75_0076	562.67	272.849
PCT_DYNMULTI_0_6_H40F_76_0077	562.726	272.815
PCT_DYNMULTI_0_6_H40F_77_0078	562.782	273.135
PCT_DYNMULTI_0_6_H40F_78_0079	562.838	272.907
PCT_DYNMULTI_0_6_H40F_79_0080	562.86	273.004
PCT_DYNMULTI_0_6_H40F_80_0081	562.916	273.05
PCT_DYNMULTI_0_6_H40F_81_0082	563.029	273.012
PCT_DYNMULTI_0_6_H40F_82_0083	563.051	273.033
PCT_DYNMULTI_0_6_H40F_83_0084	563.017	272.925
PCT_DYNMULTI_0_6_H40F_84_0085	562.972	272.946
PCT_DYNMULTI_0_6_H40F_85_0086	563.017	272.885
PCT_DYNMULTI_0_6_H40F_86_0087	562.972	272.781
PCT_DYNMULTI_0_6_H40F_87_0088	562.972	272.789
PCT_DYNMULTI_0_6_H40F_88_0089	563.04	273.097
PCT_DYNMULTI_0_6_H40F_89_0090	562.972	273.06
PCT_DYNMULTI_0_6_H40F_90_0091	563.118	273.09
PCT_DYNMULTI_0_6_H40F_91_0092	563.107	273.041
PCT_DYNMULTI_0_6_H40F_92_0093	563.185	273.111
PCT_DYNMULTI_0_6_H40F_93_0094	563.152	273.023
PCT_DYNMULTI_0_6_H40F_94_0095	563.107	272.979
Patient Name	EXPII-025-00
Patient ID	22.08.26-17:57:05-DST-1.3.12.2.1107.5.1.4.64279
Set constrast treshold [min] [max]	399	400
Resolution [#] (px,py,slice)	512	512	64
Resolution [mm] (px,py,slice)	0.1367	0.1367	0.6
Scaled Resolution [#] (px,py,slice)	512	512	64
Scaled Resolution [mm] (px,py,slice)	0.1367	0.1367	0.6
Mask XY/Axial Plane ROI points	[185 175 100 100]	Mask XY/Axial Plane ROI slice #	42
Mask XZ/Sagittal Plane ROI points	[1 1 1 1]	Mask XZ/Sagittal Plane ROI slice #	1
Mask YZ/Coronal Plane ROI points	[1 1 1 1]	Mask YZ/Coronal Plane ROI slice #	1

## Sheet: EXPII-050-00
Order	Volume mm3	Surface mm2					Min-Min
PCT_DYNMULTI_0_6_H40F_1_0002	546.749	267.438
PCT_DYNMULTI_0_6_H40F_2_0003	546.704	267.675		Moyenne volume		546.625		Moyenne	SD	CoV	relative	rel%	SD rel%	COV
PCT_DYNMULTI_0_6_H40F_3_0004	546.625	267.589		547.178		547.365	0.611061	0.336364	0.147558	0.438685	0.000614725	0.0614725	0.026967	0.438685
PCT_DYNMULTI_0_6_H40F_4_0005	546.771	267.541		Mediane volume		546.883
PCT_DYNMULTI_0_6_H40F_5_0006	546.704	267.285		547.219		547.32	0.31394
PCT_DYNMULTI_0_6_H40F_6_0007	546.681	267.315				547.13
PCT_DYNMULTI_0_6_H40F_7_0008	546.715	267.258				547.32	0.308334
PCT_DYNMULTI_0_6_H40F_8_0009	546.816	267.278				546.894
PCT_DYNMULTI_0_6_H40F_9_0010	546.894	267.326				547.287	0.274697
PCT_DYNMULTI_0_6_H40F_10_0011	546.894	267.397				547.13
PCT_DYNMULTI_0_6_H40F_11_0012	547.051	267.396				547.489	0.34197
PCT_DYNMULTI_0_6_H40F_12_0013	547.107	267.411				547.163
PCT_DYNMULTI_0_6_H40F_13_0014	547.275	267.475				547.388	0.168182
PCT_DYNMULTI_0_6_H40F_14_0015	547.365	267.508				547.275
PCT_DYNMULTI_0_6_H40F_15_0016	547.365	267.45
PCT_DYNMULTI_0_6_H40F_16_0017	547.275	267.39
PCT_DYNMULTI_0_6_H40F_17_0018	547.163	267.331
PCT_DYNMULTI_0_6_H40F_18_0019	547.242	267.302
PCT_DYNMULTI_0_6_H40F_19_0020	547.13	267.138
PCT_DYNMULTI_0_6_H40F_20_0021	547.074	267.121
PCT_DYNMULTI_0_6_H40F_21_0022	546.995	267.191
PCT_DYNMULTI_0_6_H40F_22_0023	546.928	267.107
PCT_DYNMULTI_0_6_H40F_23_0024	546.905	267.09
PCT_DYNMULTI_0_6_H40F_24_0025	546.883	267.218
PCT_DYNMULTI_0_6_H40F_25_0026	546.939	267.095
PCT_DYNMULTI_0_6_H40F_26_0027	546.984	267.18
PCT_DYNMULTI_0_6_H40F_27_0028	547.04	267.197
PCT_DYNMULTI_0_6_H40F_28_0029	547.107	267.146
PCT_DYNMULTI_0_6_H40F_29_0030	547.062	267.146
PCT_DYNMULTI_0_6_H40F_30_0031	547.219	267.209
PCT_DYNMULTI_0_6_H40F_31_0032	547.287	267.169
PCT_DYNMULTI_0_6_H40F_32_0033	547.32	267.191
PCT_DYNMULTI_0_6_H40F_33_0034	547.309	267.247
PCT_DYNMULTI_0_6_H40F_34_0035	547.298	267.244
PCT_DYNMULTI_0_6_H40F_35_0036	547.186	267.192
PCT_DYNMULTI_0_6_H40F_36_0037	547.163	267.004
PCT_DYNMULTI_0_6_H40F_37_0038	547.141	267.143
PCT_DYNMULTI_0_6_H40F_38_0039	547.13	267.174
PCT_DYNMULTI_0_6_H40F_39_0040	547.152	266.996
PCT_DYNMULTI_0_6_H40F_40_0041	547.231	267.126
PCT_DYNMULTI_0_6_H40F_41_0042	547.298	267.032
PCT_DYNMULTI_0_6_H40F_42_0043	547.298	267.112
PCT_DYNMULTI_0_6_H40F_43_0044	547.275	267.034
PCT_DYNMULTI_0_6_H40F_44_0045	547.32	266.934
PCT_DYNMULTI_0_6_H40F_45_0046	547.32	266.923
PCT_DYNMULTI_0_6_H40F_46_0047	547.219	266.934
PCT_DYNMULTI_0_6_H40F_47_0048	547.186	266.959
PCT_DYNMULTI_0_6_H40F_48_0049	547.197	266.929
PCT_DYNMULTI_0_6_H40F_49_0050	547.018	266.92
PCT_DYNMULTI_0_6_H40F_50_0051	547.04	266.794
PCT_DYNMULTI_0_6_H40F_51_0052	546.894	266.759
PCT_DYNMULTI_0_6_H40F_52_0053	547.04	266.838
PCT_DYNMULTI_0_6_H40F_53_0054	547.13	266.774
PCT_DYNMULTI_0_6_H40F_54_0055	547.163	266.832
PCT_DYNMULTI_0_6_H40F_55_0056	547.096	266.738
PCT_DYNMULTI_0_6_H40F_56_0057	547.197	266.747
PCT_DYNMULTI_0_6_H40F_57_0058	547.287	266.811
PCT_DYNMULTI_0_6_H40F_58_0059	547.163	266.817
PCT_DYNMULTI_0_6_H40F_59_0060	547.163	266.776
PCT_DYNMULTI_0_6_H40F_60_0061	547.219	266.803
PCT_DYNMULTI_0_6_H40F_61_0062	547.163	266.757
PCT_DYNMULTI_0_6_H40F_62_0063	547.163	266.646
PCT_DYNMULTI_0_6_H40F_63_0064	547.13	266.698
PCT_DYNMULTI_0_6_H40F_64_0065	547.242	266.612
PCT_DYNMULTI_0_6_H40F_65_0066	547.32	266.638
PCT_DYNMULTI_0_6_H40F_66_0067	547.275	266.701
PCT_DYNMULTI_0_6_H40F_67_0068	547.354	266.647
PCT_DYNMULTI_0_6_H40F_68_0069	547.432	266.698
PCT_DYNMULTI_0_6_H40F_69_0070	547.421	266.779
PCT_DYNMULTI_0_6_H40F_70_0071	547.432	266.76
PCT_DYNMULTI_0_6_H40F_71_0072	547.489	266.762
PCT_DYNMULTI_0_6_H40F_72_0073	547.477	266.645
PCT_DYNMULTI_0_6_H40F_73_0074	547.421	266.638
PCT_DYNMULTI_0_6_H40F_74_0075	547.466	266.647
PCT_DYNMULTI_0_6_H40F_75_0076	547.41	266.554
PCT_DYNMULTI_0_6_H40F_76_0077	547.399	266.571
PCT_DYNMULTI_0_6_H40F_77_0078	547.399	266.571
PCT_DYNMULTI_0_6_H40F_78_0079	547.253	266.578
PCT_DYNMULTI_0_6_H40F_79_0080	547.219	266.449
PCT_DYNMULTI_0_6_H40F_80_0081	547.231	266.489
PCT_DYNMULTI_0_6_H40F_81_0082	547.163	266.461
PCT_DYNMULTI_0_6_H40F_82_0083	547.163	266.414
PCT_DYNMULTI_0_6_H40F_83_0084	547.242	266.535
PCT_DYNMULTI_0_6_H40F_84_0085	547.32	266.475
PCT_DYNMULTI_0_6_H40F_85_0086	547.376	266.392
PCT_DYNMULTI_0_6_H40F_86_0087	547.388	266.322
PCT_DYNMULTI_0_6_H40F_87_0088	547.332	266.377
PCT_DYNMULTI_0_6_H40F_88_0089	547.309	266.392
PCT_DYNMULTI_0_6_H40F_89_0090	547.365	266.392
PCT_DYNMULTI_0_6_H40F_90_0091	547.275	266.403
PCT_DYNMULTI_0_6_H40F_91_0092	547.275	266.366
PCT_DYNMULTI_0_6_H40F_92_0093	547.309	266.436
PCT_DYNMULTI_0_6_H40F_93_0094	547.399	266.5
PCT_DYNMULTI_0_6_H40F_94_0095	547.455	266.593
Patient Name	EXPII-050-00
Patient ID	22.08.26-17:46:55-DST-1.3.12.2.1107.5.1.4.64279
Set constrast treshold [min] [max]	399	400
Resolution [#] (px,py,slice)	512	512	64
Resolution [mm] (px,py,slice)	0.1367	0.1367	0.6
Scaled Resolution [#] (px,py,slice)	512	512	64
Scaled Resolution [mm] (px,py,slice)	0.1367	0.1367	0.6
Mask XY/Axial Plane ROI points	[186 166 100 100]	Mask XY/Axial Plane ROI slice #	37
Mask XZ/Sagittal Plane ROI points	[1 1 1 1]	Mask XZ/Sagittal Plane ROI slice #	1
Mask YZ/Coronal Plane ROI points	[1 1 1 1]	Mask YZ/Coronal Plane ROI slice #	1

## Sheet: EXPII-070-00
Order	Volume mm3	Surface mm2					Max-Max
PCT_DYNMULTI_0_6_H40F_2_0100	530.368	255.893
PCT_DYNMULTI_0_6_H40F_3_1001	530.323	256.1		Moyenne volume		530.446		Moyenne	SD	CoV	relative	rel%	SD rel%	COV
PCT_DYNMULTI_0_6_H40F_4_1002	530.39	256.077		530.018		529.975	0.437273	0.386819	0.0537715	0.13901	0.000729821	0.0729821	0.0101452	0.13901
PCT_DYNMULTI_0_6_H40F_5_1003	530.345	255.839		Mediane volume		530.379
PCT_DYNMULTI_0_6_H40F_6_1004	530.446	256.185		529.975		529.885	0.414849
PCT_DYNMULTI_0_6_H40F_7_1005	530.356	256.202				530.222
PCT_DYNMULTI_0_6_H40F_8_1006	530.345	256.169				529.863	0.31394
PCT_DYNMULTI_0_6_H40F_9_1007	530.267	255.815				530.132
PCT_DYNMULTI_0_6_H40F_10_1008	530.177	255.806				529.695	0.381213
PCT_DYNMULTI_0_6_H40F_11_1009	529.975	255.472				530.02
PCT_DYNMULTI_0_6_H40F_12_1010	530.031	255.502
PCT_DYNMULTI_0_6_H40F_13_1011	530.054	255.502
PCT_DYNMULTI_0_6_H40F_14_1012	530.087	255.304
PCT_DYNMULTI_0_6_H40F_15_1013	530.289	255.527
PCT_DYNMULTI_0_6_H40F_16_1014	530.39	255.553
PCT_DYNMULTI_0_6_H40F_17_1015	530.379	255.549
PCT_DYNMULTI_0_6_H40F_18_1016	530.3	255.427
PCT_DYNMULTI_0_6_H40F_19_1017	530.199	255.679
PCT_DYNMULTI_0_6_H40F_20_1018	530.199	255.58
PCT_DYNMULTI_0_6_H40F_21_1019	530.143	255.526
PCT_DYNMULTI_0_6_H40F_22_1020	530.121	255.431
PCT_DYNMULTI_0_6_H40F_23_1021	530.132	255.445
PCT_DYNMULTI_0_6_H40F_24_1022	530.054	255.606
PCT_DYNMULTI_0_6_H40F_25_1023	530.054	255.438
PCT_DYNMULTI_0_6_H40F_26_1024	529.93	255.425
PCT_DYNMULTI_0_6_H40F_27_1025	529.93	255.229
PCT_DYNMULTI_0_6_H40F_28_1026	529.885	255.218
PCT_DYNMULTI_0_6_H40F_29_1027	529.998	255.236
PCT_DYNMULTI_0_6_H40F_30_1028	530.132	255.324
PCT_DYNMULTI_0_6_H40F_31_1029	530.199	255.168
PCT_DYNMULTI_0_6_H40F_32_1030	530.222	255.249
PCT_DYNMULTI_0_6_H40F_33_1031	530.211	255.263
PCT_DYNMULTI_0_6_H40F_34_1032	530.132	255.095
PCT_DYNMULTI_0_6_H40F_35_1033	530.098	255.214
PCT_DYNMULTI_0_6_H40F_36_1034	530.143	255.344
PCT_DYNMULTI_0_6_H40F_37_1035	530.031	255.174
PCT_DYNMULTI_0_6_H40F_38_1036	529.964	255.161
PCT_DYNMULTI_0_6_H40F_39_1037	529.885	255.206
PCT_DYNMULTI_0_6_H40F_40_1038	529.93	255.358
PCT_DYNMULTI_0_6_H40F_41_1039	529.897	255.045
PCT_DYNMULTI_0_6_H40F_42_1040	529.986	255.205
PCT_DYNMULTI_0_6_H40F_43_1041	529.863	255.418
PCT_DYNMULTI_0_6_H40F_44_1042	529.897	255.293
PCT_DYNMULTI_0_6_H40F_45_1043	529.953	255.52
PCT_DYNMULTI_0_6_H40F_46_1044	529.919	255.762
PCT_DYNMULTI_0_6_H40F_47_1045	529.942	255.59
PCT_DYNMULTI_0_6_H40F_48_1046	529.919	255.396
PCT_DYNMULTI_0_6_H40F_49_1047	530.087	255.272
PCT_DYNMULTI_0_6_H40F_50_1048	530.087	255.162
PCT_DYNMULTI_0_6_H40F_51_1049	530.076	254.96
PCT_DYNMULTI_0_6_H40F_52_1050	530.132	255.041
PCT_DYNMULTI_0_6_H40F_53_1051	530.087	255.135
PCT_DYNMULTI_0_6_H40F_54_1052	530.087	255.07
PCT_DYNMULTI_0_6_H40F_55_1053	530.042	255.143
PCT_DYNMULTI_0_6_H40F_56_1054	529.93	255.118
PCT_DYNMULTI_0_6_H40F_57_1055	529.919	255.14
PCT_DYNMULTI_0_6_H40F_58_1056	529.93	255.313
PCT_DYNMULTI_0_6_H40F_59_1057	530.042	255.225
PCT_DYNMULTI_0_6_H40F_60_1058	529.93	255.288
PCT_DYNMULTI_0_6_H40F_61_1059	529.897	255.232
PCT_DYNMULTI_0_6_H40F_62_1060	529.93	255.357
PCT_DYNMULTI_0_6_H40F_63_1061	529.897	255.174
PCT_DYNMULTI_0_6_H40F_64_1062	529.975	255.402
PCT_DYNMULTI_0_6_H40F_65_1063	529.908	255.367
PCT_DYNMULTI_0_6_H40F_66_1064	529.953	255.478
PCT_DYNMULTI_0_6_H40F_67_1065	529.874	255.117
PCT_DYNMULTI_0_6_H40F_68_1066	529.964	255.043
PCT_DYNMULTI_0_6_H40F_69_1067	529.919	255.013
PCT_DYNMULTI_0_6_H40F_70_1068	529.874	255.086
PCT_DYNMULTI_0_6_H40F_71_1069	529.863	255.087
PCT_DYNMULTI_0_6_H40F_72_1070	529.93	255.524
PCT_DYNMULTI_0_6_H40F_73_1071	529.852	255.503
PCT_DYNMULTI_0_6_H40F_74_1072	529.807	255.13
PCT_DYNMULTI_0_6_H40F_75_1073	529.807	254.969
PCT_DYNMULTI_0_6_H40F_76_1074	529.74	254.92
PCT_DYNMULTI_0_6_H40F_77_1075	529.695	254.932
PCT_DYNMULTI_0_6_H40F_78_1076	529.706	254.974
PCT_DYNMULTI_0_6_H40F_79_1077	529.807	254.896
PCT_DYNMULTI_0_6_H40F_80_1078	529.829	254.938
PCT_DYNMULTI_0_6_H40F_81_1079	529.919	254.976
PCT_DYNMULTI_0_6_H40F_82_1080	529.93	255.008
PCT_DYNMULTI_0_6_H40F_83_1081	529.942	254.912
PCT_DYNMULTI_0_6_H40F_84_1082	529.998	254.986
PCT_DYNMULTI_0_6_H40F_85_1083	530.02	254.971
PCT_DYNMULTI_0_6_H40F_86_1084	529.897	254.932
PCT_DYNMULTI_0_6_H40F_87_1085	529.942	255.008
PCT_DYNMULTI_0_6_H40F_88_1086	529.908	254.636
PCT_DYNMULTI_0_6_H40F_89_1087	529.818	254.74
PCT_DYNMULTI_0_6_H40F_90_1088	529.796	254.916
PCT_DYNMULTI_0_6_H40F_91_1089	529.74	254.942
PCT_DYNMULTI_0_6_H40F_92_1090	529.706	254.864
Patient Name	EXPII-070-00
Patient ID	22.08.26-17:21:17-DST-1.3.12.2.1107.5.1.4.64279
Set constrast treshold [min] [max]	399	400
Resolution [#] (px,py,slice)	512	512	64
Resolution [mm] (px,py,slice)	0.1367	0.1367	0.6
Scaled Resolution [#] (px,py,slice)	512	512	64
Scaled Resolution [mm] (px,py,slice)	0.1367	0.1367	0.6
Mask XY/Axial Plane ROI points	[202 179 100 100]	Mask XY/Axial Plane ROI slice #	39
Mask XZ/Sagittal Plane ROI points	[1 1 1 1]	Mask XZ/Sagittal Plane ROI slice #	1
Mask YZ/Coronal Plane ROI points	[1 1 1 1]	Mask YZ/Coronal Plane ROI slice #	1

## Sheet: EXPII-000-10
Order	Volume mm3	Surface mm2					Max-Max
PCT_DYNMULTI_0_6_H40F_1_0002	544.125	259.145
PCT_DYNMULTI_0_6_H40F_2_0003	544.428	259.272		Moyenne volume		544.428		Moyenne	SD	CoV	relative	rel%	SD rel%	COV
PCT_DYNMULTI_0_6_H40F_3_0004	544.069	259.199		540.223		535.525	8.90243	8.85759	0.16329	0.018435	0.0163962	1.63962	0.0302263	0.018435
PCT_DYNMULTI_0_6_H40F_4_0005	542.858	258.699		Mediane volume		544.428
PCT_DYNMULTI_0_6_H40F_5_0006	540.234	257.528		540.234		535.447	9.08743
PCT_DYNMULTI_0_6_H40F_6_0007	538.048	256.61				544.641
PCT_DYNMULTI_0_6_H40F_7_0008	536.646	256.115				536.007	8.59971
PCT_DYNMULTI_0_6_H40F_8_0009	535.693	255.759				544.573
PCT_DYNMULTI_0_6_H40F_9_0010	535.525	255.45				535.772	8.8688
PCT_DYNMULTI_0_6_H40F_10_0011	536.142	255.717				544.708
PCT_DYNMULTI_0_6_H40F_11_0012	538.597	256.84				535.805	8.76789
PCT_DYNMULTI_0_6_H40F_12_0013	541.086	257.693				544.439
PCT_DYNMULTI_0_6_H40F_13_0014	542.634	258.546				535.615	8.91925
PCT_DYNMULTI_0_6_H40F_14_0015	544.058	259.183				544.629
PCT_DYNMULTI_0_6_H40F_15_0016	544.428	259.343				536.052	8.35304
PCT_DYNMULTI_0_6_H40F_16_0017	544.349	259.25				544.181
PCT_DYNMULTI_0_6_H40F_17_0018	543.037	258.632
PCT_DYNMULTI_0_6_H40F_18_0019	540.963	257.939
PCT_DYNMULTI_0_6_H40F_19_0020	539.079	256.783
PCT_DYNMULTI_0_6_H40F_20_0021	536.938	256.038
PCT_DYNMULTI_0_6_H40F_21_0022	535.772	255.813
PCT_DYNMULTI_0_6_H40F_22_0023	535.447	255.448
PCT_DYNMULTI_0_6_H40F_23_0024	536.041	255.646
PCT_DYNMULTI_0_6_H40F_24_0025	537.801	256.288
PCT_DYNMULTI_0_6_H40F_25_0026	539.741	257.276
PCT_DYNMULTI_0_6_H40F_26_0027	542.252	258.4
PCT_DYNMULTI_0_6_H40F_27_0028	543.934	259.099
PCT_DYNMULTI_0_6_H40F_28_0029	544.607	259.502
PCT_DYNMULTI_0_6_H40F_29_0030	544.641	259.248
PCT_DYNMULTI_0_6_H40F_30_0031	544.035	259.131
PCT_DYNMULTI_0_6_H40F_31_0032	542.465	258.29
PCT_DYNMULTI_0_6_H40F_32_0033	539.819	257.332
PCT_DYNMULTI_0_6_H40F_33_0034	537.622	256.307
PCT_DYNMULTI_0_6_H40F_34_0035	536.523	255.76
PCT_DYNMULTI_0_6_H40F_35_0036	536.007	255.548
PCT_DYNMULTI_0_6_H40F_36_0037	536.041	255.605
PCT_DYNMULTI_0_6_H40F_37_0038	536.859	255.916
PCT_DYNMULTI_0_6_H40F_38_0039	539.472	257.248
PCT_DYNMULTI_0_6_H40F_39_0040	541.826	258.113
PCT_DYNMULTI_0_6_H40F_40_0041	543.149	258.669
PCT_DYNMULTI_0_6_H40F_41_0042	544.36	259.23
PCT_DYNMULTI_0_6_H40F_42_0043	544.573	259.337
PCT_DYNMULTI_0_6_H40F_43_0044	544.349	259.295
PCT_DYNMULTI_0_6_H40F_44_0045	542.533	258.241
PCT_DYNMULTI_0_6_H40F_45_0046	540.302	257.299
PCT_DYNMULTI_0_6_H40F_46_0047	538.687	256.914
PCT_DYNMULTI_0_6_H40F_47_0048	536.77	255.912
PCT_DYNMULTI_0_6_H40F_48_0049	535.839	255.61
PCT_DYNMULTI_0_6_H40F_49_0050	535.772	255.515
PCT_DYNMULTI_0_6_H40F_50_0051	536.803	256.113
PCT_DYNMULTI_0_6_H40F_51_0052	538.855	257.03
PCT_DYNMULTI_0_6_H40F_52_0053	540.593	257.603
PCT_DYNMULTI_0_6_H40F_53_0054	542.858	258.411
PCT_DYNMULTI_0_6_H40F_54_0055	544.259	259.191
PCT_DYNMULTI_0_6_H40F_55_0056	544.708	259.418
PCT_DYNMULTI_0_6_H40F_56_0057	544.45	259.116
PCT_DYNMULTI_0_6_H40F_57_0058	543.441	258.56
PCT_DYNMULTI_0_6_H40F_58_0059	541.815	257.85
PCT_DYNMULTI_0_6_H40F_59_0060	539.18	256.708
PCT_DYNMULTI_0_6_H40F_60_0061	537.218	255.776
PCT_DYNMULTI_0_6_H40F_61_0062	536.299	255.216
PCT_DYNMULTI_0_6_H40F_62_0063	535.805	255.226
PCT_DYNMULTI_0_6_H40F_63_0064	536.142	255.412
PCT_DYNMULTI_0_6_H40F_64_0065	537.263	256.074
PCT_DYNMULTI_0_6_H40F_65_0066	540.088	257.281
PCT_DYNMULTI_0_6_H40F_66_0067	542.028	257.947
PCT_DYNMULTI_0_6_H40F_67_0068	543.486	258.862
PCT_DYNMULTI_0_6_H40F_68_0069	544.416	259.225
PCT_DYNMULTI_0_6_H40F_69_0070	544.439	259.132
PCT_DYNMULTI_0_6_H40F_70_0071	543.945	258.991
PCT_DYNMULTI_0_6_H40F_71_0072	541.703	257.766
PCT_DYNMULTI_0_6_H40F_72_0073	539.461	256.953
PCT_DYNMULTI_0_6_H40F_73_0074	537.992	256.467
PCT_DYNMULTI_0_6_H40F_74_0075	536.232	255.401
PCT_DYNMULTI_0_6_H40F_75_0076	535.615	255.103
PCT_DYNMULTI_0_6_H40F_76_0077	535.705	255.529
PCT_DYNMULTI_0_6_H40F_77_0078	537.353	256.525
PCT_DYNMULTI_0_6_H40F_78_0079	539.629	257.292
PCT_DYNMULTI_0_6_H40F_79_0080	541.198	257.554
PCT_DYNMULTI_0_6_H40F_80_0081	543.374	258.998
PCT_DYNMULTI_0_6_H40F_81_0082	544.416	259.329
PCT_DYNMULTI_0_6_H40F_82_0083	544.629	259.341
PCT_DYNMULTI_0_6_H40F_83_0084	544.192	259.074
PCT_DYNMULTI_0_6_H40F_84_0085	542.667	258.631
PCT_DYNMULTI_0_6_H40F_85_0086	540.985	257.54
PCT_DYNMULTI_0_6_H40F_86_0087	538.519	256.462
PCT_DYNMULTI_0_6_H40F_87_0088	536.972	255.956
PCT_DYNMULTI_0_6_H40F_88_0089	536.254	255.558
PCT_DYNMULTI_0_6_H40F_89_0090	536.052	255.679
PCT_DYNMULTI_0_6_H40F_90_0091	536.815	255.964
PCT_DYNMULTI_0_6_H40F_91_0092	538.328	256.266
PCT_DYNMULTI_0_6_H40F_92_0093	541.165	257.902
PCT_DYNMULTI_0_6_H40F_93_0094	543.172	258.76
PCT_DYNMULTI_0_6_H40F_94_0095	544.181	259.183
Patient Name	EXPII-000-10
Patient ID	22.08.26-18:27:35-DST-1.3.12.2.1107.5.1.4.64279
Set constrast treshold [min] [max]	399	400
Resolution [#] (px,py,slice)	512	512	64
Resolution [mm] (px,py,slice)	0.1367	0.1367	0.6
Scaled Resolution [#] (px,py,slice)	512	512	64
Scaled Resolution [mm] (px,py,slice)	0.1367	0.1367	0.6
Mask XY/Axial Plane ROI points	[208 180 100 100]	Mask XY/Axial Plane ROI slice #	39
Mask XZ/Sagittal Plane ROI points	[1 1 1 1]	Mask XZ/Sagittal Plane ROI slice #	1
Mask YZ/Coronal Plane ROI points	[1 1 1 1]	Mask YZ/Coronal Plane ROI slice #	1

## Sheet: EXPII-012-10
Order	Volume mm3	Surface mm2					Max-Max
PCT_DYNMULTI_0_6_H40F_1_0002	532.229	267.4
PCT_DYNMULTI_0_6_H40F_2_0003	533.776	267.855		Moyenne volume		534.595		Moyenne	SD	CoV	relative	rel%	SD rel%	COV
PCT_DYNMULTI_0_6_H40F_3_0004	534.382	268.069		530.745		526.69	7.85971	8.00359	0.174228	0.0217687	0.0150799	1.50799	0.032827	0.0217687	2.17687
PCT_DYNMULTI_0_6_H40F_4_0005	534.595	268.091		Mediane volume		534.505
PCT_DYNMULTI_0_6_H40F_5_0006	533.776	268.005		530.412		526.679	8.12319
PCT_DYNMULTI_0_6_H40F_6_0007	531.769	267.259				535.099
PCT_DYNMULTI_0_6_H40F_7_0008	530.132	266.729				526.768	8.24092
PCT_DYNMULTI_0_6_H40F_8_0009	528.305	266.202				534.92
PCT_DYNMULTI_0_6_H40F_9_0010	527.071	265.768				526.656	8.09516
PCT_DYNMULTI_0_6_H40F_10_0011	526.69	265.689				534.583
PCT_DYNMULTI_0_6_H40F_11_0012	526.712	265.525				526.78	7.90455
PCT_DYNMULTI_0_6_H40F_12_0013	527.789	265.927				534.785
PCT_DYNMULTI_0_6_H40F_13_0014	529.347	266.529				526.925	7.79804
PCT_DYNMULTI_0_6_H40F_14_0015	531.601	267.254				534.662
PCT_DYNMULTI_0_6_H40F_15_0016	533.698	267.995
PCT_DYNMULTI_0_6_H40F_16_0017	534.281	268.079
PCT_DYNMULTI_0_6_H40F_17_0018	534.505	268.223
PCT_DYNMULTI_0_6_H40F_18_0019	533.933	268.048
PCT_DYNMULTI_0_6_H40F_19_0020	532.778	267.749
PCT_DYNMULTI_0_6_H40F_20_0021	530.569	267.029
PCT_DYNMULTI_0_6_H40F_21_0022	528.181	266.166
PCT_DYNMULTI_0_6_H40F_22_0023	527.363	265.973
PCT_DYNMULTI_0_6_H40F_23_0024	526.735	265.838
PCT_DYNMULTI_0_6_H40F_24_0025	526.679	265.748
PCT_DYNMULTI_0_6_H40F_25_0026	527.228	265.927
PCT_DYNMULTI_0_6_H40F_26_0027	528.899	266.348
PCT_DYNMULTI_0_6_H40F_27_0028	531.881	267.502
PCT_DYNMULTI_0_6_H40F_28_0029	533.26	267.857
PCT_DYNMULTI_0_6_H40F_29_0030	534.426	268.296
PCT_DYNMULTI_0_6_H40F_30_0031	535.099	268.477
PCT_DYNMULTI_0_6_H40F_31_0032	535.009	268.409
PCT_DYNMULTI_0_6_H40F_32_0033	533.978	268.128
PCT_DYNMULTI_0_6_H40F_33_0034	531.365	267.064
PCT_DYNMULTI_0_6_H40F_34_0035	529.897	266.8
PCT_DYNMULTI_0_6_H40F_35_0036	528.058	266.234
PCT_DYNMULTI_0_6_H40F_36_0037	527.004	265.871
PCT_DYNMULTI_0_6_H40F_37_0038	526.768	265.73
PCT_DYNMULTI_0_6_H40F_38_0039	526.959	265.745
PCT_DYNMULTI_0_6_H40F_39_0040	528.54	266.421
PCT_DYNMULTI_0_6_H40F_40_0041	530.233	266.884
PCT_DYNMULTI_0_6_H40F_41_0042	532.498	267.603
PCT_DYNMULTI_0_6_H40F_42_0043	534.056	268.192
PCT_DYNMULTI_0_6_H40F_43_0044	534.752	268.546
PCT_DYNMULTI_0_6_H40F_44_0045	534.92	268.435
PCT_DYNMULTI_0_6_H40F_45_0046	534	268.118
PCT_DYNMULTI_0_6_H40F_46_0047	532.834	267.792
PCT_DYNMULTI_0_6_H40F_47_0048	530.211	267.021
PCT_DYNMULTI_0_6_H40F_48_0049	527.957	266.257
PCT_DYNMULTI_0_6_H40F_49_0050	527.071	265.859
PCT_DYNMULTI_0_6_H40F_50_0051	526.656	265.881
PCT_DYNMULTI_0_6_H40F_51_0052	526.78	265.918
PCT_DYNMULTI_0_6_H40F_52_0053	527.475	266.138
PCT_DYNMULTI_0_6_H40F_53_0054	529.538	266.548
PCT_DYNMULTI_0_6_H40F_54_0055	532.33	267.588
PCT_DYNMULTI_0_6_H40F_55_0056	533.428	268.019
PCT_DYNMULTI_0_6_H40F_56_0057	534.269	268.318
PCT_DYNMULTI_0_6_H40F_57_0058	534.583	268.322
PCT_DYNMULTI_0_6_H40F_58_0059	534.314	268.262
PCT_DYNMULTI_0_6_H40F_59_0060	532.778	267.736
PCT_DYNMULTI_0_6_H40F_60_0061	530.255	266.875
PCT_DYNMULTI_0_6_H40F_61_0062	528.876	266.277
PCT_DYNMULTI_0_6_H40F_62_0063	527.486	265.908
PCT_DYNMULTI_0_6_H40F_63_0064	526.869	265.684
PCT_DYNMULTI_0_6_H40F_64_0065	526.78	265.757
PCT_DYNMULTI_0_6_H40F_65_0066	527.497	265.941
PCT_DYNMULTI_0_6_H40F_66_0067	529.471	266.481
PCT_DYNMULTI_0_6_H40F_67_0068	531.096	267.23
PCT_DYNMULTI_0_6_H40F_68_0069	533.115	267.883
PCT_DYNMULTI_0_6_H40F_69_0070	534.382	268.433
PCT_DYNMULTI_0_6_H40F_70_0071	534.785	268.592
PCT_DYNMULTI_0_6_H40F_71_0072	534.617	268.522
PCT_DYNMULTI_0_6_H40F_72_0073	533.529	267.945
PCT_DYNMULTI_0_6_H40F_73_0074	532.251	267.581
PCT_DYNMULTI_0_6_H40F_74_0075	529.829	266.778
PCT_DYNMULTI_0_6_H40F_75_0076	527.822	265.981
PCT_DYNMULTI_0_6_H40F_76_0077	527.172	265.935
PCT_DYNMULTI_0_6_H40F_77_0078	526.925	265.829
PCT_DYNMULTI_0_6_H40F_78_0079	527.251	265.923
PCT_DYNMULTI_0_6_H40F_79_0080	528.215	266.219
PCT_DYNMULTI_0_6_H40F_80_0081	530.412	266.898
PCT_DYNMULTI_0_6_H40F_81_0082	532.924	267.798
PCT_DYNMULTI_0_6_H40F_82_0083	533.933	268.337
PCT_DYNMULTI_0_6_H40F_83_0084	534.628	268.459
PCT_DYNMULTI_0_6_H40F_84_0085	534.662	268.462
PCT_DYNMULTI_0_6_H40F_85_0086	534.18	268.287
PCT_DYNMULTI_0_6_H40F_86_0087	532.117	267.537
PCT_DYNMULTI_0_6_H40F_87_0088	529.841	266.803
PCT_DYNMULTI_0_6_H40F_88_0089	528.428	266.203
PCT_DYNMULTI_0_6_H40F_89_0090	527.228	265.814
PCT_DYNMULTI_0_6_H40F_90_0091	526.712	265.564
PCT_DYNMULTI_0_6_H40F_91_0092	526.937	265.591
PCT_DYNMULTI_0_6_H40F_92_0093	528.058	266.035
PCT_DYNMULTI_0_6_H40F_93_0094	530.67	267.065
PCT_DYNMULTI_0_6_H40F_94_0095	531.971	267.505
Patient Name	EXPII-012-10
Patient ID	22.08.26-18:17:15-DST-1.3.12.2.1107.5.1.4.64279
Set constrast treshold [min] [max]	399	400
Resolution [#] (px,py,slice)	512	512	64
Resolution [mm] (px,py,slice)	0.1367	0.1367	0.6
Scaled Resolution [#] (px,py,slice)	512	512	64
Scaled Resolution [mm] (px,py,slice)	0.1367	0.1367	0.6
Mask XY/Axial Plane ROI points	[186 182 100 100]	Mask XY/Axial Plane ROI slice #	41
Mask XZ/Sagittal Plane ROI points	[1 1 1 1]	Mask XZ/Sagittal Plane ROI slice #	1
Mask YZ/Coronal Plane ROI points	[1 1 1 1]	Mask YZ/Coronal Plane ROI slice #	1

## Sheet: EXPII-025-10
Order	Volume mm3	Surface mm2					Min-Min
PCT_DYNMULTI_0_6_H40F_1_0002	550.975	263.644
PCT_DYNMULTI_0_6_H40F_2_0003	549.922	263.481		Moyenne volume		549.787		Moyenne	SD	CoV	relative	rel%	SD rel%	COV
PCT_DYNMULTI_0_6_H40F_3_0004	549.787	263.478		554.41		558.252	8.47077	8.47077	0.136724	0.0161406	0.0152789	1.52789	0.0246611	0.0161406
PCT_DYNMULTI_0_6_H40F_4_0005	550.762	263.814		Mediane volume		549.776
PCT_DYNMULTI_0_6_H40F_5_0006	552.837	264.443		554.541		558.622	8.71743
PCT_DYNMULTI_0_6_H40F_6_0007	554.373	264.824				550.034
PCT_DYNMULTI_0_6_H40F_7_0008	556.671	265.558				558.465	8.36425
PCT_DYNMULTI_0_6_H40F_8_0009	557.949	265.917				550.168
PCT_DYNMULTI_0_6_H40F_9_0010	558.252	266.151				558.566	8.47077
PCT_DYNMULTI_0_6_H40F_10_0011	558.174	265.981				550.022
PCT_DYNMULTI_0_6_H40F_11_0012	557.131	265.425				558.589	8.47637
PCT_DYNMULTI_0_6_H40F_12_0013	555.595	265.106				550.202
PCT_DYNMULTI_0_6_H40F_13_0014	553.05	264.118				558.51	8.32501
PCT_DYNMULTI_0_6_H40F_14_0015	551.11	263.839				550.168
PCT_DYNMULTI_0_6_H40F_15_0016	550.336	263.491				558.521	7.86531
PCT_DYNMULTI_0_6_H40F_16_0017	549.776	263.378				551.144
PCT_DYNMULTI_0_6_H40F_17_0018	550.168	263.545
PCT_DYNMULTI_0_6_H40F_18_0019	551.402	263.891
PCT_DYNMULTI_0_6_H40F_19_0020	554.507	264.383
PCT_DYNMULTI_0_6_H40F_20_0021	556.402	265.005
PCT_DYNMULTI_0_6_H40F_21_0022	557.512	265.298
PCT_DYNMULTI_0_6_H40F_22_0023	558.42	265.312
PCT_DYNMULTI_0_6_H40F_23_0024	558.622	265.713
PCT_DYNMULTI_0_6_H40F_24_0025	558.219	265.351
PCT_DYNMULTI_0_6_H40F_25_0026	555.909	264.941
PCT_DYNMULTI_0_6_H40F_26_0027	553.61	264.215
PCT_DYNMULTI_0_6_H40F_27_0028	552.377	263.752
PCT_DYNMULTI_0_6_H40F_28_0029	550.583	263.35
PCT_DYNMULTI_0_6_H40F_29_0030	550.034	263.23
PCT_DYNMULTI_0_6_H40F_30_0031	550.067	263.278
PCT_DYNMULTI_0_6_H40F_31_0032	551.357	263.607
PCT_DYNMULTI_0_6_H40F_32_0033	553.476	264.3
PCT_DYNMULTI_0_6_H40F_33_0034	555.012	264.659
PCT_DYNMULTI_0_6_H40F_34_0035	557.243	264.998
PCT_DYNMULTI_0_6_H40F_35_0036	558.241	265.228
PCT_DYNMULTI_0_6_H40F_36_0037	558.465	265.232
PCT_DYNMULTI_0_6_H40F_37_0038	558.319	265.395
PCT_DYNMULTI_0_6_H40F_38_0039	557.041	265.021
PCT_DYNMULTI_0_6_H40F_39_0040	555.359	264.596
PCT_DYNMULTI_0_6_H40F_40_0041	552.691	264.02
PCT_DYNMULTI_0_6_H40F_41_0042	550.987	263.479
PCT_DYNMULTI_0_6_H40F_42_0043	550.471	263.201
PCT_DYNMULTI_0_6_H40F_43_0044	550.168	263.012
PCT_DYNMULTI_0_6_H40F_44_0045	550.897	263.333
PCT_DYNMULTI_0_6_H40F_45_0046	551.996	263.693
PCT_DYNMULTI_0_6_H40F_46_0047	555.146	264.38
PCT_DYNMULTI_0_6_H40F_47_0048	557.064	264.933
PCT_DYNMULTI_0_6_H40F_48_0049	558.05	265.172
PCT_DYNMULTI_0_6_H40F_49_0050	558.555	265.146
PCT_DYNMULTI_0_6_H40F_50_0051	558.566	265.201
PCT_DYNMULTI_0_6_H40F_51_0052	557.938	265.159
PCT_DYNMULTI_0_6_H40F_52_0053	555.505	264.771
PCT_DYNMULTI_0_6_H40F_53_0054	553.072	263.896
PCT_DYNMULTI_0_6_H40F_54_0055	551.749	263.459
PCT_DYNMULTI_0_6_H40F_55_0056	550.426	262.946
PCT_DYNMULTI_0_6_H40F_56_0057	550.022	263.044
PCT_DYNMULTI_0_6_H40F_57_0058	550.168	263.081
PCT_DYNMULTI_0_6_H40F_58_0059	552.175	263.703
PCT_DYNMULTI_0_6_H40F_59_0060	554.563	264.151
PCT_DYNMULTI_0_6_H40F_60_0061	556.212	264.749
PCT_DYNMULTI_0_6_H40F_61_0062	557.736	265.111
PCT_DYNMULTI_0_6_H40F_62_0063	558.353	265.241
PCT_DYNMULTI_0_6_H40F_63_0064	558.589	265.248
PCT_DYNMULTI_0_6_H40F_64_0065	557.703	265.007
PCT_DYNMULTI_0_6_H40F_65_0066	555.909	264.635
PCT_DYNMULTI_0_6_H40F_66_0067	554.261	263.88
PCT_DYNMULTI_0_6_H40F_67_0068	551.772	263.463
PCT_DYNMULTI_0_6_H40F_68_0069	550.415	263.042
PCT_DYNMULTI_0_6_H40F_69_0070	550.202	262.945
PCT_DYNMULTI_0_6_H40F_70_0071	550.258	262.922
PCT_DYNMULTI_0_6_H40F_71_0072	551.469	263.595
PCT_DYNMULTI_0_6_H40F_72_0073	552.96	263.945
PCT_DYNMULTI_0_6_H40F_73_0074	555.875	264.689
PCT_DYNMULTI_0_6_H40F_74_0075	557.613	264.925
PCT_DYNMULTI_0_6_H40F_75_0076	558.219	265.134
PCT_DYNMULTI_0_6_H40F_76_0077	558.51	265.045
PCT_DYNMULTI_0_6_H40F_77_0078	558.174	265.052
PCT_DYNMULTI_0_6_H40F_78_0079	556.952	265.05
PCT_DYNMULTI_0_6_H40F_79_0080	554.519	264.226
PCT_DYNMULTI_0_6_H40F_80_0081	552.276	263.618
PCT_DYNMULTI_0_6_H40F_81_0082	551.155	263.15
PCT_DYNMULTI_0_6_H40F_82_0083	550.28	262.816
PCT_DYNMULTI_0_6_H40F_83_0084	550.168	262.852
PCT_DYNMULTI_0_6_H40F_84_0085	550.583	263.001
PCT_DYNMULTI_0_6_H40F_85_0086	553.061	263.638
PCT_DYNMULTI_0_6_H40F_86_0087	555.404	264.163
PCT_DYNMULTI_0_6_H40F_87_0088	556.705	264.758
PCT_DYNMULTI_0_6_H40F_88_0089	558.073	264.957
PCT_DYNMULTI_0_6_H40F_89_0090	558.521	265.175
PCT_DYNMULTI_0_6_H40F_90_0091	558.342	264.984
PCT_DYNMULTI_0_6_H40F_91_0092	557.131	264.83
PCT_DYNMULTI_0_6_H40F_92_0093	555.146	264.27
PCT_DYNMULTI_0_6_H40F_93_0094	553.666	263.873
PCT_DYNMULTI_0_6_H40F_94_0095	551.144	263.26
Patient Name	EXPII-025-10
Patient ID	22.08.26-17:58:53-DST-1.3.12.2.1107.5.1.4.64279
Set constrast treshold [min] [max]	399	400
Resolution [#] (px,py,slice)	512	512	64
Resolution [mm] (px,py,slice)	0.1367	0.1367	0.6
Scaled Resolution [#] (px,py,slice)	512	512	64
Scaled Resolution [mm] (px,py,slice)	0.1367	0.1367	0.6
Mask XY/Axial Plane ROI points	[201 174 100 100]	Mask XY/Axial Plane ROI slice #	43
Mask XZ/Sagittal Plane ROI points	[1 1 1 1]	Mask XZ/Sagittal Plane ROI slice #	1
Mask YZ/Coronal Plane ROI points	[1 1 1 1]	Mask YZ/Coronal Plane ROI slice #	1

## Sheet: EXPII-050-10
Order	Volume mm3	Surface mm2					Max-Max
PCT_DYNMULTI_0_6_H40F_1_0002	559.777	263.668
PCT_DYNMULTI_0_6_H40F_2_0003	559.766	264.011		Moyenne volume		559.777		Moyenne	SD	CoV	relative	rel%	SD rel%	COV
PCT_DYNMULTI_0_6_H40F_3_0004	559.149	263.854		555.882		551.637	8.26334	8.05312	0.155188	0.0192705	0.0144871	1.44871	0.0279174	0.0192705
PCT_DYNMULTI_0_6_H40F_4_0005	557.142	263.197		Mediane volume		560.024
PCT_DYNMULTI_0_6_H40F_5_0006	554.317	262.824		555.976		551.772	8.02228
PCT_DYNMULTI_0_6_H40F_6_0007	552.938	262.229				559.564
PCT_DYNMULTI_0_6_H40F_7_0008	552.153	261.978				551.525	8.19607
PCT_DYNMULTI_0_6_H40F_8_0009	551.637	262.011				559.878
PCT_DYNMULTI_0_6_H40F_9_0010	551.727	261.91				551.805	8.06152
PCT_DYNMULTI_0_6_H40F_10_0011	553.24	262.298				559.855
PCT_DYNMULTI_0_6_H40F_11_0012	556.357	262.8				552.018	7.89334
PCT_DYNMULTI_0_6_H40F_12_0013	557.658	263.102				559.968
PCT_DYNMULTI_0_6_H40F_13_0014	559.183	263.489				551.973	7.88213
PCT_DYNMULTI_0_6_H40F_14_0015	559.855	263.623				559.743
PCT_DYNMULTI_0_6_H40F_15_0016	560.024	263.725				552.119	7.62986
PCT_DYNMULTI_0_6_H40F_16_0017	559.205	263.387				559.755
PCT_DYNMULTI_0_6_H40F_17_0018	557.411	263.447
PCT_DYNMULTI_0_6_H40F_18_0019	555.864	262.899
PCT_DYNMULTI_0_6_H40F_19_0020	553.868	262.385
PCT_DYNMULTI_0_6_H40F_20_0021	552.287	261.914
PCT_DYNMULTI_0_6_H40F_21_0022	551.895	269.344
PCT_DYNMULTI_0_6_H40F_22_0023	551.772	269.228
PCT_DYNMULTI_0_6_H40F_23_0024	552.837	262.094
PCT_DYNMULTI_0_6_H40F_24_0025	554.249	262.537
PCT_DYNMULTI_0_6_H40F_25_0026	556.514	263.049
PCT_DYNMULTI_0_6_H40F_26_0027	558.454	263.267
PCT_DYNMULTI_0_6_H40F_27_0028	559.284	263.488
PCT_DYNMULTI_0_6_H40F_28_0029	559.564	263.435
PCT_DYNMULTI_0_6_H40F_29_0030	559.295	263.466
PCT_DYNMULTI_0_6_H40F_30_0031	558.375	263.227
PCT_DYNMULTI_0_6_H40F_31_0032	556.088	262.558
PCT_DYNMULTI_0_6_H40F_32_0033	553.588	262.374
PCT_DYNMULTI_0_6_H40F_33_0034	552.478	269.405
PCT_DYNMULTI_0_6_H40F_34_0035	551.727	261.71
PCT_DYNMULTI_0_6_H40F_35_0036	551.525	261.645
PCT_DYNMULTI_0_6_H40F_36_0037	551.884	261.845
PCT_DYNMULTI_0_6_H40F_37_0038	553.779	262.14
PCT_DYNMULTI_0_6_H40F_38_0039	556.705	262.707
PCT_DYNMULTI_0_6_H40F_39_0040	558.095	263.023
PCT_DYNMULTI_0_6_H40F_40_0041	559.284	263.37
PCT_DYNMULTI_0_6_H40F_41_0042	559.855	263.424
PCT_DYNMULTI_0_6_H40F_42_0043	559.878	263.31
PCT_DYNMULTI_0_6_H40F_43_0044	558.701	263.156
PCT_DYNMULTI_0_6_H40F_44_0045	556.369	262.994
PCT_DYNMULTI_0_6_H40F_45_0046	554.855	262.376
PCT_DYNMULTI_0_6_H40F_46_0047	553.173	262.047
PCT_DYNMULTI_0_6_H40F_47_0048	552.018	261.572
PCT_DYNMULTI_0_6_H40F_48_0049	551.805	269.11
PCT_DYNMULTI_0_6_H40F_49_0050	552.029	269.167
PCT_DYNMULTI_0_6_H40F_50_0051	553.734	262.075
PCT_DYNMULTI_0_6_H40F_51_0052	555.169	262.616
PCT_DYNMULTI_0_6_H40F_52_0053	557.411	263.269
PCT_DYNMULTI_0_6_H40F_53_0054	559.172	263.347
PCT_DYNMULTI_0_6_H40F_54_0055	559.766	263.523
PCT_DYNMULTI_0_6_H40F_55_0056	559.855	263.499
PCT_DYNMULTI_0_6_H40F_56_0057	559.205	263.489
PCT_DYNMULTI_0_6_H40F_57_0058	558.039	263.095
PCT_DYNMULTI_0_6_H40F_58_0059	555.774	262.285
PCT_DYNMULTI_0_6_H40F_59_0060	553.375	262.096
PCT_DYNMULTI_0_6_H40F_60_0061	552.489	269.3
PCT_DYNMULTI_0_6_H40F_61_0062	552.029	269.136
PCT_DYNMULTI_0_6_H40F_62_0063	552.018	261.632
PCT_DYNMULTI_0_6_H40F_63_0064	552.523	261.844
PCT_DYNMULTI_0_6_H40F_64_0065	554.754	262.406
PCT_DYNMULTI_0_6_H40F_65_0066	557.378	262.715
PCT_DYNMULTI_0_6_H40F_66_0067	558.633	263.17
PCT_DYNMULTI_0_6_H40F_67_0068	559.564	263.369
PCT_DYNMULTI_0_6_H40F_68_0069	559.968	263.421
PCT_DYNMULTI_0_6_H40F_69_0070	559.923	263.414
PCT_DYNMULTI_0_6_H40F_70_0071	558.387	263.13
PCT_DYNMULTI_0_6_H40F_71_0072	555.718	262.846
PCT_DYNMULTI_0_6_H40F_72_0073	554.35	262.277
PCT_DYNMULTI_0_6_H40F_73_0074	552.949	262.037
PCT_DYNMULTI_0_6_H40F_74_0075	552.041	261.927
PCT_DYNMULTI_0_6_H40F_75_0076	551.973	269.39
PCT_DYNMULTI_0_6_H40F_76_0077	552.601	261.803
PCT_DYNMULTI_0_6_H40F_77_0078	554.552	262.475
PCT_DYNMULTI_0_6_H40F_78_0079	556.178	262.785
PCT_DYNMULTI_0_6_H40F_79_0080	558.219	262.926
PCT_DYNMULTI_0_6_H40F_80_0081	559.542	263.244
PCT_DYNMULTI_0_6_H40F_81_0082	559.743	263.235
PCT_DYNMULTI_0_6_H40F_82_0083	559.564	263.33
PCT_DYNMULTI_0_6_H40F_83_0084	558.734	263.112
PCT_DYNMULTI_0_6_H40F_84_0085	557.378	262.707
PCT_DYNMULTI_0_6_H40F_85_0086	555.09	262.143
PCT_DYNMULTI_0_6_H40F_86_0087	552.926	262.017
PCT_DYNMULTI_0_6_H40F_87_0088	552.321	261.557
PCT_DYNMULTI_0_6_H40F_88_0089	552.119	268.999
PCT_DYNMULTI_0_6_H40F_89_0090	552.377	269.135
PCT_DYNMULTI_0_6_H40F_90_0091	553.218	262.095
PCT_DYNMULTI_0_6_H40F_91_0092	555.516	262.647
PCT_DYNMULTI_0_6_H40F_92_0093	558.174	262.909
PCT_DYNMULTI_0_6_H40F_93_0094	559.059	263.17
PCT_DYNMULTI_0_6_H40F_94_0095	559.755	263.2
Patient Name	EXPII-050-10
Patient ID	22.08.26-17:49:10-DST-1.3.12.2.1107.5.1.4.64279
Set constrast treshold [min] [max]	399	400
Resolution [#] (px,py,slice)	512	512	64
Resolution [mm] (px,py,slice)	0.1367	0.1367	0.6
Scaled Resolution [#] (px,py,slice)	512	512	64
Scaled Resolution [mm] (px,py,slice)	0.1367	0.1367	0.6
Mask XY/Axial Plane ROI points	[181 167 100 100]	Mask XY/Axial Plane ROI slice #	42
Mask XZ/Sagittal Plane ROI points	[1 1 1 1]	Mask XZ/Sagittal Plane ROI slice #	1
Mask YZ/Coronal Plane ROI points	[1 1 1 1]	Mask YZ/Coronal Plane ROI slice #	1

[truncated: 16 more sheets: EXPII-070-10, EXPII-000-15, EXPII-012-15, EXPII-025-15, EXPII-050-15, EXPII-070-15, EXPII-000-20, EXPII-012-20, EXPII-025-20, EXPII-050-20, EXPII-070-20, EXPII-000-25, EXPII-012-25, EXPII-025-25, EXPII-050-25, EXPII-070-25]
