# Supplementary material for: Intracranial aneurysms: in vitro study of “intracranial” pressure and parent vessel curvature as potential modifiers of aneurysm pulsation amplitude
Source: Research Square preprint supplement (doi:10.21203/rs.3.rs-8211535/v1), 2026-02-20
Supplement: Supplementary file 3 [file c30f2860246ba9454f995992.xlsx]

## Sheet: Sheet1
Order	Each CT scanner reconstructed volume in chronologic order (each "frame" is 50ms)
Volume	Aneurysm model volume in mm3
Surface	Aneurysm wall surface in mm²
Naming convention	…-XXX-YY - XXX = external pressure in the chamber in mmHg - YY = pulse pump voltage, value should be divided by 10 (e.g. 10 = 1.0V)
Due to a first experiment having been erronately made with different conditions, this is experiment nr 2 and not 3

## Sheet: EXP3_00_00
Order	Volume mm3	Surface mm2
PCT_DYNMULTI_0_6_H40F_1_0002	524.907	273.685		524.885	525.422	525.782
PCT_DYNMULTI_0_6_H40F_2_0003	524.918	273.67
PCT_DYNMULTI_0_6_H40F_3_0004	525.064	273.899
PCT_DYNMULTI_0_6_H40F_4_0005	525.098	273.67
PCT_DYNMULTI_0_6_H40F_5_0006	525.3	273.977
PCT_DYNMULTI_0_6_H40F_6_0007	525.445	273.906
PCT_DYNMULTI_0_6_H40F_7_0008	525.625	273.988
PCT_DYNMULTI_0_6_H40F_8_0009	525.535	274.009
PCT_DYNMULTI_0_6_H40F_9_0010	525.468	274.032
PCT_DYNMULTI_0_6_H40F_10_0011	525.434	274.077
PCT_DYNMULTI_0_6_H40F_11_0012	525.513	273.95
PCT_DYNMULTI_0_6_H40F_12_0013	525.445	273.913
PCT_DYNMULTI_0_6_H40F_13_0014	525.423	273.929
PCT_DYNMULTI_0_6_H40F_14_0015	525.412	273.98
PCT_DYNMULTI_0_6_H40F_15_0016	525.569	274.075
PCT_DYNMULTI_0_6_H40F_16_0017	525.546	274.019
PCT_DYNMULTI_0_6_H40F_17_0018	525.49	274.223
PCT_DYNMULTI_0_6_H40F_18_0019	525.49	274.13
PCT_DYNMULTI_0_6_H40F_19_0020	525.445	274.114
PCT_DYNMULTI_0_6_H40F_20_0021	525.266	273.909
PCT_DYNMULTI_0_6_H40F_21_0022	525.232	273.829
PCT_DYNMULTI_0_6_H40F_22_0023	525.221	273.829
PCT_DYNMULTI_0_6_H40F_23_0024	525.232	273.979
PCT_DYNMULTI_0_6_H40F_24_0025	525.266	274.224
PCT_DYNMULTI_0_6_H40F_25_0026	525.277	274.209
PCT_DYNMULTI_0_6_H40F_26_0027	525.378	273.954
PCT_DYNMULTI_0_6_H40F_27_0028	525.434	274.049
PCT_DYNMULTI_0_6_H40F_28_0029	525.524	274.116
PCT_DYNMULTI_0_6_H40F_29_0030	525.524	273.994
PCT_DYNMULTI_0_6_H40F_30_0031	525.535	273.913
PCT_DYNMULTI_0_6_H40F_31_0032	525.535	274.009
PCT_DYNMULTI_0_6_H40F_32_0033	525.367	273.937
PCT_DYNMULTI_0_6_H40F_33_0034	525.412	273.868
PCT_DYNMULTI_0_6_H40F_34_0035	525.378	273.9
PCT_DYNMULTI_0_6_H40F_35_0036	525.468	274.098
PCT_DYNMULTI_0_6_H40F_36_0037	525.479	273.969
PCT_DYNMULTI_0_6_H40F_37_0038	525.479	274.019
PCT_DYNMULTI_0_6_H40F_38_0039	525.625	274.1
PCT_DYNMULTI_0_6_H40F_39_0040	525.658	274.08
PCT_DYNMULTI_0_6_H40F_40_0041	525.636	274.054
PCT_DYNMULTI_0_6_H40F_41_0042	525.569	274.331
PCT_DYNMULTI_0_6_H40F_42_0043	525.558	274.099
PCT_DYNMULTI_0_6_H40F_43_0044	525.614	274.029
PCT_DYNMULTI_0_6_H40F_44_0045	525.535	274.05
PCT_DYNMULTI_0_6_H40F_45_0046	525.345	273.867
PCT_DYNMULTI_0_6_H40F_46_0047	525.266	273.87
PCT_DYNMULTI_0_6_H40F_47_0048	525.356	273.79
PCT_DYNMULTI_0_6_H40F_48_0049	525.288	273.723
PCT_DYNMULTI_0_6_H40F_49_0050	525.311	273.908
PCT_DYNMULTI_0_6_H40F_50_0051	525.322	273.976
PCT_DYNMULTI_0_6_H40F_51_0052	525.423	274.013
PCT_DYNMULTI_0_6_H40F_52_0053	525.468	273.975
PCT_DYNMULTI_0_6_H40F_53_0054	525.524	274.058
PCT_DYNMULTI_0_6_H40F_54_0055	525.524	274.091
PCT_DYNMULTI_0_6_H40F_55_0056	525.49	274.01
PCT_DYNMULTI_0_6_H40F_56_0057	525.132	273.872
PCT_DYNMULTI_0_6_H40F_57_0058	524.918	273.679
PCT_DYNMULTI_0_6_H40F_58_0059	524.885	273.661
PCT_DYNMULTI_0_6_H40F_59_0060	524.952	273.94
PCT_DYNMULTI_0_6_H40F_60_0061	524.952	274.123
PCT_DYNMULTI_0_6_H40F_61_0062	524.975	273.9
PCT_DYNMULTI_0_6_H40F_62_0063	525.132	273.991
PCT_DYNMULTI_0_6_H40F_63_0064	525.277	273.957
PCT_DYNMULTI_0_6_H40F_64_0065	525.333	274
PCT_DYNMULTI_0_6_H40F_65_0066	525.345	274.077
PCT_DYNMULTI_0_6_H40F_66_0067	525.333	274.019
PCT_DYNMULTI_0_6_H40F_67_0068	525.412	274.067
PCT_DYNMULTI_0_6_H40F_68_0069	525.367	273.982
PCT_DYNMULTI_0_6_H40F_69_0070	525.378	274.004
PCT_DYNMULTI_0_6_H40F_70_0071	525.345	273.968
PCT_DYNMULTI_0_6_H40F_71_0072	525.345	273.961
PCT_DYNMULTI_0_6_H40F_72_0073	525.423	274.057
PCT_DYNMULTI_0_6_H40F_73_0074	525.434	274.008
PCT_DYNMULTI_0_6_H40F_74_0075	525.569	274.161
PCT_DYNMULTI_0_6_H40F_75_0076	525.591	274.125
PCT_DYNMULTI_0_6_H40F_76_0077	525.591	274.108
PCT_DYNMULTI_0_6_H40F_77_0078	525.737	274.261
PCT_DYNMULTI_0_6_H40F_78_0079	525.748	274.172
PCT_DYNMULTI_0_6_H40F_79_0080	525.67	274.156
PCT_DYNMULTI_0_6_H40F_80_0081	525.692	274.088
PCT_DYNMULTI_0_6_H40F_81_0082	525.636	274.114
PCT_DYNMULTI_0_6_H40F_82_0083	525.715	274.185
PCT_DYNMULTI_0_6_H40F_83_0084	525.703	274.214
PCT_DYNMULTI_0_6_H40F_84_0085	525.759	274.35
PCT_DYNMULTI_0_6_H40F_85_0086	525.782	274.312
PCT_DYNMULTI_0_6_H40F_86_0087	525.748	274.319
PCT_DYNMULTI_0_6_H40F_87_0088	525.726	274.277
PCT_DYNMULTI_0_6_H40F_88_0089	525.614	274.273
PCT_DYNMULTI_0_6_H40F_89_0090	525.602	274.25
PCT_DYNMULTI_0_6_H40F_90_0091	525.479	274.259
PCT_DYNMULTI_0_6_H40F_91_0092	525.457	274.153
PCT_DYNMULTI_0_6_H40F_92_0093	525.468	274.208
PCT_DYNMULTI_0_6_H40F_93_0094	525.345	274.056
PCT_DYNMULTI_0_6_H40F_94_0095	525.457	274.188
Patient Name	EXP3_00_00
Patient ID	22.11.06-14:50:31-STD-1.3.12.2.1107.5.1.4.64279
Set constrast treshold [min] [max]	399	400
Resolution [#] (px,py,slice)	512	512	64
Resolution [mm] (px,py,slice)	0.1367	0.1367	0.6
Scaled Resolution [#] (px,py,slice)	512	512	64
Scaled Resolution [mm] (px,py,slice)	0.1367	0.1367	0.6
Mask XY/Axial Plane ROI points	[199 197 100 100]	Mask XY/Axial Plane ROI slice #	42
Mask XZ/Sagittal Plane ROI points	[1 1 1 1]	Mask XZ/Sagittal Plane ROI slice #	1
Mask YZ/Coronal Plane ROI points	[1 1 1 1]	Mask YZ/Coronal Plane ROI slice #	1

## Sheet: EXP3_00_12
Order	Volume mm3	Surface mm2
PCT_DYNMULTI_0_6_H40F_1_0002	526.174	273.339		525.199	525.897	526.253
PCT_DYNMULTI_0_6_H40F_2_0003	526.219	273.457
PCT_DYNMULTI_0_6_H40F_3_0004	526.219	273.484
PCT_DYNMULTI_0_6_H40F_4_0005	525.905	273.305
PCT_DYNMULTI_0_6_H40F_5_0006	525.703	273.289
PCT_DYNMULTI_0_6_H40F_6_0007	525.546	273.23
PCT_DYNMULTI_0_6_H40F_7_0008	525.479	273.122
PCT_DYNMULTI_0_6_H40F_8_0009	525.378	273.104
PCT_DYNMULTI_0_6_H40F_9_0010	525.199	272.973
PCT_DYNMULTI_0_6_H40F_10_0011	525.445	273.092
PCT_DYNMULTI_0_6_H40F_11_0012	525.681	273.267
PCT_DYNMULTI_0_6_H40F_12_0013	525.872	273.333
PCT_DYNMULTI_0_6_H40F_13_0014	526.073	273.436
PCT_DYNMULTI_0_6_H40F_14_0015	526.163	273.466
PCT_DYNMULTI_0_6_H40F_15_0016	526.23	273.504
PCT_DYNMULTI_0_6_H40F_16_0017	526.174	273.437
PCT_DYNMULTI_0_6_H40F_17_0018	526.174	273.373
PCT_DYNMULTI_0_6_H40F_18_0019	526.107	273.335
PCT_DYNMULTI_0_6_H40F_19_0020	526.107	273.381
PCT_DYNMULTI_0_6_H40F_20_0021	526.028	273.288
PCT_DYNMULTI_0_6_H40F_21_0022	526.006	273.362
PCT_DYNMULTI_0_6_H40F_22_0023	526.04	273.414
PCT_DYNMULTI_0_6_H40F_23_0024	526.028	273.47
PCT_DYNMULTI_0_6_H40F_24_0025	525.872	273.424
PCT_DYNMULTI_0_6_H40F_25_0026	525.894	273.573
PCT_DYNMULTI_0_6_H40F_26_0027	525.894	273.425
PCT_DYNMULTI_0_6_H40F_27_0028	525.928	273.375
PCT_DYNMULTI_0_6_H40F_28_0029	525.984	273.523
PCT_DYNMULTI_0_6_H40F_29_0030	526.051	273.468
PCT_DYNMULTI_0_6_H40F_30_0031	526.096	273.441
PCT_DYNMULTI_0_6_H40F_31_0032	526.129	273.43
PCT_DYNMULTI_0_6_H40F_32_0033	526.085	273.433
PCT_DYNMULTI_0_6_H40F_33_0034	526.028	273.358
PCT_DYNMULTI_0_6_H40F_34_0035	526.051	273.453
PCT_DYNMULTI_0_6_H40F_35_0036	525.86	273.344
PCT_DYNMULTI_0_6_H40F_36_0037	525.692	273.258
PCT_DYNMULTI_0_6_H40F_37_0038	525.658	273.225
PCT_DYNMULTI_0_6_H40F_38_0039	525.692	273.258
PCT_DYNMULTI_0_6_H40F_39_0040	525.715	273.304
PCT_DYNMULTI_0_6_H40F_40_0041	525.804	273.405
PCT_DYNMULTI_0_6_H40F_41_0042	526.028	273.42
PCT_DYNMULTI_0_6_H40F_42_0043	526.174	273.454
PCT_DYNMULTI_0_6_H40F_43_0044	526.23	273.473
PCT_DYNMULTI_0_6_H40F_44_0045	526.242	273.462
PCT_DYNMULTI_0_6_H40F_45_0046	526.253	273.528
PCT_DYNMULTI_0_6_H40F_46_0047	526.107	273.402
PCT_DYNMULTI_0_6_H40F_47_0048	526.04	273.352
PCT_DYNMULTI_0_6_H40F_48_0049	525.995	273.329
PCT_DYNMULTI_0_6_H40F_49_0050	526.107	273.491
PCT_DYNMULTI_0_6_H40F_50_0051	526.062	273.352
PCT_DYNMULTI_0_6_H40F_51_0052	525.995	273.367
PCT_DYNMULTI_0_6_H40F_52_0053	525.838	273.375
PCT_DYNMULTI_0_6_H40F_53_0054	525.647	273.246
PCT_DYNMULTI_0_6_H40F_54_0055	525.591	273.25
PCT_DYNMULTI_0_6_H40F_55_0056	525.468	273.212
PCT_DYNMULTI_0_6_H40F_56_0057	525.356	273.137
PCT_DYNMULTI_0_6_H40F_57_0058	525.288	273.186
PCT_DYNMULTI_0_6_H40F_58_0059	525.389	273.279
PCT_DYNMULTI_0_6_H40F_59_0060	525.445	273.279
PCT_DYNMULTI_0_6_H40F_60_0061	525.378	273.224
PCT_DYNMULTI_0_6_H40F_61_0062	525.502	273.297
PCT_DYNMULTI_0_6_H40F_62_0063	525.535	273.263
PCT_DYNMULTI_0_6_H40F_63_0064	525.625	273.277
PCT_DYNMULTI_0_6_H40F_64_0065	525.614	273.214
PCT_DYNMULTI_0_6_H40F_65_0066	525.726	273.35
PCT_DYNMULTI_0_6_H40F_66_0067	525.771	273.337
PCT_DYNMULTI_0_6_H40F_67_0068	525.759	273.367
PCT_DYNMULTI_0_6_H40F_68_0069	525.737	273.288
PCT_DYNMULTI_0_6_H40F_69_0070	525.928	273.375
PCT_DYNMULTI_0_6_H40F_70_0071	525.95	273.356
PCT_DYNMULTI_0_6_H40F_71_0072	525.939	273.355
PCT_DYNMULTI_0_6_H40F_72_0073	525.95	273.382
PCT_DYNMULTI_0_6_H40F_73_0074	526.017	273.434
PCT_DYNMULTI_0_6_H40F_74_0075	525.995	273.401
PCT_DYNMULTI_0_6_H40F_75_0076	525.995	273.385
PCT_DYNMULTI_0_6_H40F_76_0077	525.972	273.421
PCT_DYNMULTI_0_6_H40F_77_0078	526.006	273.418
PCT_DYNMULTI_0_6_H40F_78_0079	525.984	273.422
PCT_DYNMULTI_0_6_H40F_79_0080	525.939	273.322
PCT_DYNMULTI_0_6_H40F_80_0081	525.984	273.284
PCT_DYNMULTI_0_6_H40F_81_0082	525.995	273.337
PCT_DYNMULTI_0_6_H40F_82_0083	526.017	273.364
PCT_DYNMULTI_0_6_H40F_83_0084	526.085	273.423
PCT_DYNMULTI_0_6_H40F_84_0085	526.174	273.453
PCT_DYNMULTI_0_6_H40F_85_0086	526.152	273.494
PCT_DYNMULTI_0_6_H40F_86_0087	526.096	273.42
PCT_DYNMULTI_0_6_H40F_87_0088	526.208	273.521
PCT_DYNMULTI_0_6_H40F_88_0089	526.04	273.403
PCT_DYNMULTI_0_6_H40F_89_0090	526.073	273.452
PCT_DYNMULTI_0_6_H40F_90_0091	525.95	273.345
PCT_DYNMULTI_0_6_H40F_91_0092	525.961	273.293
PCT_DYNMULTI_0_6_H40F_92_0093	525.916	273.37
PCT_DYNMULTI_0_6_H40F_93_0094	525.849	273.296
PCT_DYNMULTI_0_6_H40F_94_0095	525.894	273.277
Patient Name	EXP3_00_12
Patient ID	22.11.06-14:39:12-STD-1.3.12.2.1107.5.1.4.64279
Set constrast treshold [min] [max]	399	400
Resolution [#] (px,py,slice)	512	512	64
Resolution [mm] (px,py,slice)	0.1367	0.1367	0.6
Scaled Resolution [#] (px,py,slice)	512	512	64
Scaled Resolution [mm] (px,py,slice)	0.1367	0.1367	0.6
Mask XY/Axial Plane ROI points	[193 183 100 100]	Mask XY/Axial Plane ROI slice #	39
Mask XZ/Sagittal Plane ROI points	[1 1 1 1]	Mask XZ/Sagittal Plane ROI slice #	1
Mask YZ/Coronal Plane ROI points	[1 1 1 1]	Mask YZ/Coronal Plane ROI slice #	1

## Sheet: EXP3_00_25
Order	Volume mm3	Surface mm2
PCT_DYNMULTI_0_6_H40F_1_0002	534.841	273.793		534.348	535.037	535.447
PCT_DYNMULTI_0_6_H40F_2_0003	534.796	273.592
PCT_DYNMULTI_0_6_H40F_3_0004	534.796	273.719
PCT_DYNMULTI_0_6_H40F_4_0005	534.572	273.668
PCT_DYNMULTI_0_6_H40F_5_0006	534.583	273.817
PCT_DYNMULTI_0_6_H40F_6_0007	534.662	274.065
PCT_DYNMULTI_0_6_H40F_7_0008	534.583	273.724
PCT_DYNMULTI_0_6_H40F_8_0009	534.718	273.628
PCT_DYNMULTI_0_6_H40F_9_0010	534.595	273.594
PCT_DYNMULTI_0_6_H40F_10_0011	534.606	273.883
PCT_DYNMULTI_0_6_H40F_11_0012	534.348	273.676
PCT_DYNMULTI_0_6_H40F_12_0013	534.415	273.793
PCT_DYNMULTI_0_6_H40F_13_0014	534.572	273.905
PCT_DYNMULTI_0_6_H40F_14_0015	534.561	273.879
PCT_DYNMULTI_0_6_H40F_15_0016	534.55	273.796
PCT_DYNMULTI_0_6_H40F_16_0017	534.74	274.171
PCT_DYNMULTI_0_6_H40F_17_0018	534.897	273.904
PCT_DYNMULTI_0_6_H40F_18_0019	534.707	273.915
PCT_DYNMULTI_0_6_H40F_19_0020	534.662	273.852
PCT_DYNMULTI_0_6_H40F_20_0021	534.684	273.868
PCT_DYNMULTI_0_6_H40F_21_0022	534.595	273.873
PCT_DYNMULTI_0_6_H40F_22_0023	534.606	273.798
PCT_DYNMULTI_0_6_H40F_23_0024	534.572	273.828
PCT_DYNMULTI_0_6_H40F_24_0025	534.572	273.726
PCT_DYNMULTI_0_6_H40F_25_0026	534.74	273.775
PCT_DYNMULTI_0_6_H40F_26_0027	534.897	273.794
PCT_DYNMULTI_0_6_H40F_27_0028	534.931	273.709
PCT_DYNMULTI_0_6_H40F_28_0029	535.054	273.966
PCT_DYNMULTI_0_6_H40F_29_0030	535.088	274.028
PCT_DYNMULTI_0_6_H40F_30_0031	535.166	273.959
PCT_DYNMULTI_0_6_H40F_31_0032	535.211	274.109
PCT_DYNMULTI_0_6_H40F_32_0033	535.267	274.158
PCT_DYNMULTI_0_6_H40F_33_0034	535.245	274.24
PCT_DYNMULTI_0_6_H40F_34_0035	535.346	274.255
PCT_DYNMULTI_0_6_H40F_35_0036	535.379	274.331
PCT_DYNMULTI_0_6_H40F_36_0037	535.211	274.197
PCT_DYNMULTI_0_6_H40F_37_0038	535.043	274.081
PCT_DYNMULTI_0_6_H40F_38_0039	535.077	274.185
PCT_DYNMULTI_0_6_H40F_39_0040	535.009	273.899
PCT_DYNMULTI_0_6_H40F_40_0041	534.852	273.971
PCT_DYNMULTI_0_6_H40F_41_0042	534.92	273.861
PCT_DYNMULTI_0_6_H40F_42_0043	535.021	273.932
PCT_DYNMULTI_0_6_H40F_43_0044	535.032	274.023
PCT_DYNMULTI_0_6_H40F_44_0045	535.043	273.99
PCT_DYNMULTI_0_6_H40F_45_0046	535.189	274.119
PCT_DYNMULTI_0_6_H40F_46_0047	535.222	274.071
PCT_DYNMULTI_0_6_H40F_47_0048	535.312	274.196
PCT_DYNMULTI_0_6_H40F_48_0049	535.178	274.214
PCT_DYNMULTI_0_6_H40F_49_0050	535.144	274.079
PCT_DYNMULTI_0_6_H40F_50_0051	535.009	274.007
PCT_DYNMULTI_0_6_H40F_51_0052	534.965	274.045
PCT_DYNMULTI_0_6_H40F_52_0053	534.796	274.019
PCT_DYNMULTI_0_6_H40F_53_0054	534.774	274.117
PCT_DYNMULTI_0_6_H40F_54_0055	534.841	273.936
PCT_DYNMULTI_0_6_H40F_55_0056	534.864	273.892
PCT_DYNMULTI_0_6_H40F_56_0057	534.931	274.082
PCT_DYNMULTI_0_6_H40F_57_0058	535.133	274.096
PCT_DYNMULTI_0_6_H40F_58_0059	535.178	274.132
PCT_DYNMULTI_0_6_H40F_59_0060	535.144	274.226
PCT_DYNMULTI_0_6_H40F_60_0061	535.166	274.194
PCT_DYNMULTI_0_6_H40F_61_0062	535.245	274.308
PCT_DYNMULTI_0_6_H40F_62_0063	535.278	274.248
PCT_DYNMULTI_0_6_H40F_63_0064	535.267	274.161
PCT_DYNMULTI_0_6_H40F_64_0065	535.391	274.295
PCT_DYNMULTI_0_6_H40F_65_0066	535.256	274.333
PCT_DYNMULTI_0_6_H40F_66_0067	535.335	274.305
PCT_DYNMULTI_0_6_H40F_67_0068	535.267	274.163
PCT_DYNMULTI_0_6_H40F_68_0069	535.301	274.172
PCT_DYNMULTI_0_6_H40F_69_0070	535.391	274.409
PCT_DYNMULTI_0_6_H40F_70_0071	535.323	274.304
PCT_DYNMULTI_0_6_H40F_71_0072	535.278	274.21
PCT_DYNMULTI_0_6_H40F_72_0073	535.166	274.143
PCT_DYNMULTI_0_6_H40F_73_0074	535.278	274.154
PCT_DYNMULTI_0_6_H40F_74_0075	535.29	274.315
PCT_DYNMULTI_0_6_H40F_75_0076	535.166	274.063
PCT_DYNMULTI_0_6_H40F_76_0077	535.234	274.255
PCT_DYNMULTI_0_6_H40F_77_0078	535.312	274.278
PCT_DYNMULTI_0_6_H40F_78_0079	535.424	274.348
PCT_DYNMULTI_0_6_H40F_79_0080	535.256	274.325
PCT_DYNMULTI_0_6_H40F_80_0081	535.335	274.382
PCT_DYNMULTI_0_6_H40F_81_0082	535.346	274.373
PCT_DYNMULTI_0_6_H40F_82_0083	535.267	274.327
PCT_DYNMULTI_0_6_H40F_83_0084	535.222	274.329
PCT_DYNMULTI_0_6_H40F_84_0085	535.278	274.41
PCT_DYNMULTI_0_6_H40F_85_0086	535.335	274.423
PCT_DYNMULTI_0_6_H40F_86_0087	535.447	274.447
PCT_DYNMULTI_0_6_H40F_87_0088	535.379	274.592
PCT_DYNMULTI_0_6_H40F_88_0089	535.245	274.321
PCT_DYNMULTI_0_6_H40F_89_0090	535.189	274.249
PCT_DYNMULTI_0_6_H40F_90_0091	535.178	274.232
PCT_DYNMULTI_0_6_H40F_91_0092	535.189	274.381
PCT_DYNMULTI_0_6_H40F_92_0093	535.267	274.348
PCT_DYNMULTI_0_6_H40F_93_0094	535.335	274.249
PCT_DYNMULTI_0_6_H40F_94_0095	535.424	274.26
Patient Name	EXP3_00_25
Patient ID	22.11.06-14:26:23-STD-1.3.12.2.1107.5.1.4.64279
Set constrast treshold [min] [max]	399	400
Resolution [#] (px,py,slice)	512	512	64
Resolution [mm] (px,py,slice)	0.1367	0.1367	0.6
Scaled Resolution [#] (px,py,slice)	512	512	64
Scaled Resolution [mm] (px,py,slice)	0.1367	0.1367	0.6
Mask XY/Axial Plane ROI points	[192 184 100 100]	Mask XY/Axial Plane ROI slice #	41
Mask XZ/Sagittal Plane ROI points	[1 1 1 1]	Mask XZ/Sagittal Plane ROI slice #	1
Mask YZ/Coronal Plane ROI points	[1 1 1 1]	Mask YZ/Coronal Plane ROI slice #	1

## Sheet: EXP3_00_50
Order	Volume mm3	Surface mm2
PCT_DYNMULTI_0_6_H40F_1_0002	525.838	260.768		525.423	525.807	526.174
PCT_DYNMULTI_0_6_H40F_2_0003	525.984	260.775
PCT_DYNMULTI_0_6_H40F_3_0004	525.984	260.767
PCT_DYNMULTI_0_6_H40F_4_0005	525.883	260.79
PCT_DYNMULTI_0_6_H40F_5_0006	525.916	260.83
PCT_DYNMULTI_0_6_H40F_6_0007	525.759	260.83
PCT_DYNMULTI_0_6_H40F_7_0008	525.748	260.738
PCT_DYNMULTI_0_6_H40F_8_0009	525.647	260.648
PCT_DYNMULTI_0_6_H40F_9_0010	525.748	260.694
PCT_DYNMULTI_0_6_H40F_10_0011	525.827	260.799
PCT_DYNMULTI_0_6_H40F_11_0012	525.883	260.854
PCT_DYNMULTI_0_6_H40F_12_0013	525.827	260.777
PCT_DYNMULTI_0_6_H40F_13_0014	525.86	260.823
PCT_DYNMULTI_0_6_H40F_14_0015	525.782	260.706
PCT_DYNMULTI_0_6_H40F_15_0016	525.737	260.697
PCT_DYNMULTI_0_6_H40F_16_0017	525.737	260.699
PCT_DYNMULTI_0_6_H40F_17_0018	525.771	260.752
PCT_DYNMULTI_0_6_H40F_18_0019	525.782	260.705
PCT_DYNMULTI_0_6_H40F_19_0020	525.916	260.726
PCT_DYNMULTI_0_6_H40F_20_0021	525.961	260.78
PCT_DYNMULTI_0_6_H40F_21_0022	525.961	260.747
PCT_DYNMULTI_0_6_H40F_22_0023	525.916	260.773
PCT_DYNMULTI_0_6_H40F_23_0024	525.928	260.812
PCT_DYNMULTI_0_6_H40F_24_0025	525.961	260.828
PCT_DYNMULTI_0_6_H40F_25_0026	525.984	260.837
PCT_DYNMULTI_0_6_H40F_26_0027	525.849	260.767
PCT_DYNMULTI_0_6_H40F_27_0028	525.939	260.754
PCT_DYNMULTI_0_6_H40F_28_0029	525.883	260.777
PCT_DYNMULTI_0_6_H40F_29_0030	525.815	260.763
PCT_DYNMULTI_0_6_H40F_30_0031	525.804	260.682
PCT_DYNMULTI_0_6_H40F_31_0032	525.849	260.732
PCT_DYNMULTI_0_6_H40F_32_0033	525.827	260.755
PCT_DYNMULTI_0_6_H40F_33_0034	525.872	260.764
PCT_DYNMULTI_0_6_H40F_34_0035	525.849	260.786
PCT_DYNMULTI_0_6_H40F_35_0036	525.883	260.819
PCT_DYNMULTI_0_6_H40F_36_0037	525.703	260.729
PCT_DYNMULTI_0_6_H40F_37_0038	525.737	260.773
PCT_DYNMULTI_0_6_H40F_38_0039	525.681	260.734
PCT_DYNMULTI_0_6_H40F_39_0040	525.647	260.766
PCT_DYNMULTI_0_6_H40F_40_0041	525.692	260.78
PCT_DYNMULTI_0_6_H40F_41_0042	525.67	260.769
PCT_DYNMULTI_0_6_H40F_42_0043	525.67	260.76
PCT_DYNMULTI_0_6_H40F_43_0044	525.883	260.822
PCT_DYNMULTI_0_6_H40F_44_0045	525.905	260.853
PCT_DYNMULTI_0_6_H40F_45_0046	525.972	260.858
PCT_DYNMULTI_0_6_H40F_46_0047	526.062	260.822
PCT_DYNMULTI_0_6_H40F_47_0048	526.028	260.877
PCT_DYNMULTI_0_6_H40F_48_0049	525.939	260.793
PCT_DYNMULTI_0_6_H40F_49_0050	525.793	260.814
PCT_DYNMULTI_0_6_H40F_50_0051	525.591	260.741
PCT_DYNMULTI_0_6_H40F_51_0052	525.468	260.742
PCT_DYNMULTI_0_6_H40F_52_0053	525.423	260.716
PCT_DYNMULTI_0_6_H40F_53_0054	525.423	260.693
PCT_DYNMULTI_0_6_H40F_54_0055	525.445	260.831
PCT_DYNMULTI_0_6_H40F_55_0056	525.636	260.791
PCT_DYNMULTI_0_6_H40F_56_0057	525.681	260.815
PCT_DYNMULTI_0_6_H40F_57_0058	525.692	260.759
PCT_DYNMULTI_0_6_H40F_58_0059	525.636	260.799
PCT_DYNMULTI_0_6_H40F_59_0060	525.58	260.868
PCT_DYNMULTI_0_6_H40F_60_0061	525.524	260.827
PCT_DYNMULTI_0_6_H40F_61_0062	525.535	260.883
PCT_DYNMULTI_0_6_H40F_62_0063	525.625	260.969
PCT_DYNMULTI_0_6_H40F_63_0064	525.58	260.918
PCT_DYNMULTI_0_6_H40F_64_0065	525.793	260.947
PCT_DYNMULTI_0_6_H40F_65_0066	525.737	260.893
PCT_DYNMULTI_0_6_H40F_66_0067	525.872	260.996
PCT_DYNMULTI_0_6_H40F_67_0068	525.86	260.943
PCT_DYNMULTI_0_6_H40F_68_0069	525.771	260.886
PCT_DYNMULTI_0_6_H40F_69_0070	525.737	260.896
PCT_DYNMULTI_0_6_H40F_70_0071	525.737	260.926
PCT_DYNMULTI_0_6_H40F_71_0072	525.726	261.014
PCT_DYNMULTI_0_6_H40F_72_0073	525.636	260.974
PCT_DYNMULTI_0_6_H40F_73_0074	525.726	260.9
PCT_DYNMULTI_0_6_H40F_74_0075	525.793	260.949
PCT_DYNMULTI_0_6_H40F_75_0076	525.86	260.97
PCT_DYNMULTI_0_6_H40F_76_0077	525.849	260.957
PCT_DYNMULTI_0_6_H40F_77_0078	525.86	260.94
PCT_DYNMULTI_0_6_H40F_78_0079	525.815	260.961
PCT_DYNMULTI_0_6_H40F_79_0080	525.961	260.992
PCT_DYNMULTI_0_6_H40F_80_0081	526.017	260.958
PCT_DYNMULTI_0_6_H40F_81_0082	526.174	261.07
PCT_DYNMULTI_0_6_H40F_82_0083	526.107	261.162
PCT_DYNMULTI_0_6_H40F_83_0084	526.096	261.161
PCT_DYNMULTI_0_6_H40F_84_0085	526.051	261.171
PCT_DYNMULTI_0_6_H40F_85_0086	525.972	261.052
PCT_DYNMULTI_0_6_H40F_86_0087	525.961	261.032
PCT_DYNMULTI_0_6_H40F_87_0088	525.984	261.1
PCT_DYNMULTI_0_6_H40F_88_0089	525.883	261.035
PCT_DYNMULTI_0_6_H40F_89_0090	525.804	261.118
PCT_DYNMULTI_0_6_H40F_90_0091	525.759	261.069
PCT_DYNMULTI_0_6_H40F_91_0092	525.838	261.104
PCT_DYNMULTI_0_6_H40F_92_0093	525.782	261.185
PCT_DYNMULTI_0_6_H40F_93_0094	525.67	261.109
PCT_DYNMULTI_0_6_H40F_94_0095	525.928	261.243
Patient Name	EXP3_00_50
Patient ID	22.11.06-14:11:40-STD-1.3.12.2.1107.5.1.4.64279
Set constrast treshold [min] [max]	399	400
Resolution [#] (px,py,slice)	512	512	128
Resolution [mm] (px,py,slice)	0.1367	0.1367	0.6
Scaled Resolution [#] (px,py,slice)	512	512	128
Scaled Resolution [mm] (px,py,slice)	0.1367	0.1367	0.6
Mask XY/Axial Plane ROI points	[198 176 100 100]	Mask XY/Axial Plane ROI slice #	82
Mask XZ/Sagittal Plane ROI points	[1 1 1 1]	Mask XZ/Sagittal Plane ROI slice #	1
Mask YZ/Coronal Plane ROI points	[1 1 1 1]	Mask YZ/Coronal Plane ROI slice #	1

## Sheet: EXP3_00_70
Order	Volume mm3	Surface mm2
PCT_DYNMULTI_0_6_H40F_1_0003	506.923	255.806
PCT_DYNMULTI_0_6_H40F_2_0004	507.136	255.949
PCT_DYNMULTI_0_6_H40F_3_0005	507.091	255.902
PCT_DYNMULTI_0_6_H40F_4_0006	507.08	255.981
PCT_DYNMULTI_0_6_H40F_5_0007	507.158	255.94
PCT_DYNMULTI_0_6_H40F_6_0008	507.203	255.998
PCT_DYNMULTI_0_6_H40F_7_0009	507.069	256.074
PCT_DYNMULTI_0_6_H40F_8_0010	506.889	255.867
PCT_DYNMULTI_0_6_H40F_9_0011	506.912	255.989
PCT_DYNMULTI_0_6_H40F_10_0012	506.957	256.048
PCT_DYNMULTI_0_6_H40F_11_0013	506.811	256.017
PCT_DYNMULTI_0_6_H40F_12_0014	506.777	256.011
PCT_DYNMULTI_0_6_H40F_13_0015	506.755	255.83
PCT_DYNMULTI_0_6_H40F_14_0016	506.889	255.864
PCT_DYNMULTI_0_6_H40F_15_0017	506.99	255.963
PCT_DYNMULTI_0_6_H40F_16_0018	507.069	255.982
PCT_DYNMULTI_0_6_H40F_17_0019	507.058	256.002
PCT_DYNMULTI_0_6_H40F_18_0020	507.136	256.123
PCT_DYNMULTI_0_6_H40F_19_0021	507.069	256.146
PCT_DYNMULTI_0_6_H40F_20_0022	507.248	256.152
PCT_DYNMULTI_0_6_H40F_21_0023	507.282	256.256
PCT_DYNMULTI_0_6_H40F_22_0024	507.349	256.315
PCT_DYNMULTI_0_6_H40F_23_0025	507.304	256.181
PCT_DYNMULTI_0_6_H40F_24_0026	507.405	256.235
PCT_DYNMULTI_0_6_H40F_25_0027	507.428	256.138
PCT_DYNMULTI_0_6_H40F_26_0028	507.327	256.121
PCT_DYNMULTI_0_6_H40F_27_0029	507.349	256.195
PCT_DYNMULTI_0_6_H40F_28_0030	507.45	256.306
PCT_DYNMULTI_0_6_H40F_29_0031	507.461	256.255
PCT_DYNMULTI_0_6_H40F_30_0032	507.371	256.238
PCT_DYNMULTI_0_6_H40F_31_0033	507.45	256.223
PCT_DYNMULTI_0_6_H40F_32_0034	507.573	256.286
PCT_DYNMULTI_0_6_H40F_33_0035	507.585	256.349
PCT_DYNMULTI_0_6_H40F_34_0036	507.517	256.253
PCT_DYNMULTI_0_6_H40F_35_0037	507.54	256.331
PCT_DYNMULTI_0_6_H40F_36_0038	507.596	256.259
PCT_DYNMULTI_0_6_H40F_37_0039	507.652	256.334
PCT_DYNMULTI_0_6_H40F_38_0040	507.641	256.324
PCT_DYNMULTI_0_6_H40F_39_0041	507.517	256.289
PCT_DYNMULTI_0_6_H40F_40_0042	507.472	256.304
PCT_DYNMULTI_0_6_H40F_41_0043	507.394	256.324
PCT_DYNMULTI_0_6_H40F_42_0044	507.338	256.342
PCT_DYNMULTI_0_6_H40F_43_0045	507.315	256.284
PCT_DYNMULTI_0_6_H40F_44_0046	507.293	256.265
PCT_DYNMULTI_0_6_H40F_45_0047	507.315	256.276
PCT_DYNMULTI_0_6_H40F_46_0048	507.439	256.37
PCT_DYNMULTI_0_6_H40F_47_0049	507.495	256.37
PCT_DYNMULTI_0_6_H40F_48_0050	507.562	256.368
PCT_DYNMULTI_0_6_H40F_49_0051	507.506	256.31
PCT_DYNMULTI_0_6_H40F_50_0052	507.506	256.3
PCT_DYNMULTI_0_6_H40F_51_0053	507.607	256.489
PCT_DYNMULTI_0_6_H40F_52_0054	507.45	256.436
PCT_DYNMULTI_0_6_H40F_53_0055	507.428	256.336
PCT_DYNMULTI_0_6_H40F_54_0056	507.304	256.326
PCT_DYNMULTI_0_6_H40F_55_0057	507.282	256.288
PCT_DYNMULTI_0_6_H40F_56_0058	507.271	256.291
PCT_DYNMULTI_0_6_H40F_57_0059	507.215	256.258
PCT_DYNMULTI_0_6_H40F_58_0060	507.383	256.331
PCT_DYNMULTI_0_6_H40F_59_0061	507.383	256.239
PCT_DYNMULTI_0_6_H40F_60_0062	507.36	256.275
PCT_DYNMULTI_0_6_H40F_61_0063	507.528	256.391
PCT_DYNMULTI_0_6_H40F_62_0064	507.54	256.45
PCT_DYNMULTI_0_6_H40F_63_0065	507.54	256.478
PCT_DYNMULTI_0_6_H40F_64_0066	507.405	256.443
PCT_DYNMULTI_0_6_H40F_65_0067	507.45	256.337
PCT_DYNMULTI_0_6_H40F_66_0068	507.461	256.333
PCT_DYNMULTI_0_6_H40F_67_0069	507.484	256.35
PCT_DYNMULTI_0_6_H40F_68_0070	507.439	256.344
PCT_DYNMULTI_0_6_H40F_69_0071	507.472	256.314
PCT_DYNMULTI_0_6_H40F_70_0072	507.472	256.356
PCT_DYNMULTI_0_6_H40F_71_0073	507.36	256.277
PCT_DYNMULTI_0_6_H40F_72_0074	507.383	256.332
PCT_DYNMULTI_0_6_H40F_73_0075	507.271	256.315
PCT_DYNMULTI_0_6_H40F_74_0076	507.215	256.255
PCT_DYNMULTI_0_6_H40F_75_0077	507.114	256.19
PCT_DYNMULTI_0_6_H40F_76_0078	507.035	256.205
PCT_DYNMULTI_0_6_H40F_77_0079	507.136	256.265
PCT_DYNMULTI_0_6_H40F_78_0080	507.17	256.252
PCT_DYNMULTI_0_6_H40F_79_0081	507.192	256.288
PCT_DYNMULTI_0_6_H40F_80_0082	507.215	256.278
PCT_DYNMULTI_0_6_H40F_81_0083	507.248	256.25
PCT_DYNMULTI_0_6_H40F_82_0084	507.248	256.283
PCT_DYNMULTI_0_6_H40F_83_0085	507.259	256.292
PCT_DYNMULTI_0_6_H40F_84_0086	507.315	256.252
PCT_DYNMULTI_0_6_H40F_85_0087	507.349	256.333
PCT_DYNMULTI_0_6_H40F_86_0088	507.371	256.346
PCT_DYNMULTI_0_6_H40F_87_0089	507.371	256.386
PCT_DYNMULTI_0_6_H40F_88_0090	507.383	256.311
PCT_DYNMULTI_0_6_H40F_89_0091	507.282	256.39
PCT_DYNMULTI_0_6_H40F_90_0092	507.17	256.329
PCT_DYNMULTI_0_6_H40F_91_0093	507.147	256.345
PCT_DYNMULTI_0_6_H40F_92_0094	507.158	256.281
PCT_DYNMULTI_0_6_H40F_93_0095	507.17	256.358
PCT_DYNMULTI_0_6_H40F_94_0096	507.192	256.284
Patient Name	EXP3_00_70
Patient ID	22.11.06-13:57:53-STD-1.3.12.2.1107.5.1.4.64279
Set constrast treshold [min] [max]	399	400
Resolution [#] (px,py,slice)	512	512	128
Resolution [mm] (px,py,slice)	0.1367	0.1367	0.6
Scaled Resolution [#] (px,py,slice)	512	512	128
Scaled Resolution [mm] (px,py,slice)	0.1367	0.1367	0.6
Mask XY/Axial Plane ROI points	[194 181 100 100]	Mask XY/Axial Plane ROI slice #	82
Mask XZ/Sagittal Plane ROI points	[1 1 1 1]	Mask XZ/Sagittal Plane ROI slice #	1
Mask YZ/Coronal Plane ROI points	[1 1 1 1]	Mask YZ/Coronal Plane ROI slice #	1

## Sheet: EXP3_10_00
Order	Volume mm3	Surface mm2
PCT_DYNMULTI_0_6_H40F_1_0002	540.279	273.789
PCT_DYNMULTI_0_6_H40F_2_0003	538.328	272.912
PCT_DYNMULTI_0_6_H40F_3_0004	536.557	272.224
PCT_DYNMULTI_0_6_H40F_4_0005	535.514	271.881
PCT_DYNMULTI_0_6_H40F_5_0006	535.424	271.764
PCT_DYNMULTI_0_6_H40F_6_0007	536.243	272.199
PCT_DYNMULTI_0_6_H40F_7_0008	538.44	273.202
PCT_DYNMULTI_0_6_H40F_8_0009	540.705	273.919
PCT_DYNMULTI_0_6_H40F_9_0010	542.802	275.012
PCT_DYNMULTI_0_6_H40F_10_0011	544.08	275.573
PCT_DYNMULTI_0_6_H40F_11_0012	544.663	256.486
PCT_DYNMULTI_0_6_H40F_12_0013	544.394	275.7
PCT_DYNMULTI_0_6_H40F_13_0014	543.015	275.163
PCT_DYNMULTI_0_6_H40F_14_0015	541.243	274.242
PCT_DYNMULTI_0_6_H40F_15_0016	538.889	273.341
PCT_DYNMULTI_0_6_H40F_16_0017	536.848	272.442
PCT_DYNMULTI_0_6_H40F_17_0018	535.783	272.002
PCT_DYNMULTI_0_6_H40F_18_0019	535.693	272.101
PCT_DYNMULTI_0_6_H40F_19_0020	536.086	272.191
PCT_DYNMULTI_0_6_H40F_20_0021	537.487	272.835
PCT_DYNMULTI_0_6_H40F_21_0022	539.819	273.788
PCT_DYNMULTI_0_6_H40F_22_0023	542.555	275.057
PCT_DYNMULTI_0_6_H40F_23_0024	543.912	275.584
PCT_DYNMULTI_0_6_H40F_24_0025	544.372	275.8
PCT_DYNMULTI_0_6_H40F_25_0026	544.293	275.789
PCT_DYNMULTI_0_6_H40F_26_0027	543.732	275.539
PCT_DYNMULTI_0_6_H40F_27_0028	541.692	274.678
PCT_DYNMULTI_0_6_H40F_28_0029	539.001	273.487
PCT_DYNMULTI_0_6_H40F_29_0030	537.308	272.782
PCT_DYNMULTI_0_6_H40F_30_0031	535.94	272.312
PCT_DYNMULTI_0_6_H40F_31_0032	535.536	272.03
PCT_DYNMULTI_0_6_H40F_32_0033	535.727	272.073
PCT_DYNMULTI_0_6_H40F_33_0034	536.893	272.482
PCT_DYNMULTI_0_6_H40F_34_0035	539.606	273.779
PCT_DYNMULTI_0_6_H40F_35_0036	541.557	274.655
PCT_DYNMULTI_0_6_H40F_36_0037	543.766	275.394
PCT_DYNMULTI_0_6_H40F_37_0038	544.899	276.059
PCT_DYNMULTI_0_6_H40F_38_0039	545.179	276.081
PCT_DYNMULTI_0_6_H40F_39_0040	544.607	275.977
PCT_DYNMULTI_0_6_H40F_40_0041	542.791	275.167
PCT_DYNMULTI_0_6_H40F_41_0042	540.728	274.323
PCT_DYNMULTI_0_6_H40F_42_0043	538.519	273.394
PCT_DYNMULTI_0_6_H40F_43_0044	536.456	272.277
PCT_DYNMULTI_0_6_H40F_44_0045	535.794	272.286
PCT_DYNMULTI_0_6_H40F_45_0046	535.592	272.222
PCT_DYNMULTI_0_6_H40F_46_0047	536.433	272.437
PCT_DYNMULTI_0_6_H40F_47_0048	538.104	273.19
PCT_DYNMULTI_0_6_H40F_48_0049	540.391	274.042
PCT_DYNMULTI_0_6_H40F_49_0050	543.082	275.27
PCT_DYNMULTI_0_6_H40F_50_0051	544.158	275.678
PCT_DYNMULTI_0_6_H40F_51_0052	544.786	276.148
PCT_DYNMULTI_0_6_H40F_52_0053	544.786	276.103
PCT_DYNMULTI_0_6_H40F_53_0054	543.833	275.535
PCT_DYNMULTI_0_6_H40F_54_0055	541.423	274.638
PCT_DYNMULTI_0_6_H40F_55_0056	538.631	273.421
PCT_DYNMULTI_0_6_H40F_56_0057	537.14	272.781
PCT_DYNMULTI_0_6_H40F_57_0058	536.007	272.196
PCT_DYNMULTI_0_6_H40F_58_0059	535.57	272.166
PCT_DYNMULTI_0_6_H40F_59_0060	535.839	272.181
PCT_DYNMULTI_0_6_H40F_60_0061	537.633	272.888
PCT_DYNMULTI_0_6_H40F_61_0062	540.683	274.575
PCT_DYNMULTI_0_6_H40F_62_0063	542.566	275.112
PCT_DYNMULTI_0_6_H40F_63_0064	544.338	275.903
PCT_DYNMULTI_0_6_H40F_64_0065	544.932	276.199
PCT_DYNMULTI_0_6_H40F_65_0066	544.999	276.148
PCT_DYNMULTI_0_6_H40F_66_0067	544.203	275.744
PCT_DYNMULTI_0_6_H40F_67_0068	541.681	274.7
PCT_DYNMULTI_0_6_H40F_68_0069	539.517	273.828
PCT_DYNMULTI_0_6_H40F_69_0070	537.465	272.947
PCT_DYNMULTI_0_6_H40F_70_0071	536.108	272.365
PCT_DYNMULTI_0_6_H40F_71_0072	535.682	272.201
PCT_DYNMULTI_0_6_H40F_72_0073	535.873	272.321
PCT_DYNMULTI_0_6_H40F_73_0074	537.386	273.257
PCT_DYNMULTI_0_6_H40F_74_0075	539.393	273.905
PCT_DYNMULTI_0_6_H40F_75_0076	541.86	274.799
PCT_DYNMULTI_0_6_H40F_76_0077	544.002	275.763
PCT_DYNMULTI_0_6_H40F_77_0078	545.067	276.266
PCT_DYNMULTI_0_6_H40F_78_0079	545.257	276.381
PCT_DYNMULTI_0_6_H40F_79_0080	544.809	276.199
PCT_DYNMULTI_0_6_H40F_80_0081	543.508	275.61
PCT_DYNMULTI_0_6_H40F_81_0082	540.974	274.699
PCT_DYNMULTI_0_6_H40F_82_0083	538.328	273.44
PCT_DYNMULTI_0_6_H40F_83_0084	537.039	272.956
PCT_DYNMULTI_0_6_H40F_84_0085	536.288	272.683
PCT_DYNMULTI_0_6_H40F_85_0086	536.075	272.414
PCT_DYNMULTI_0_6_H40F_86_0087	536.747	272.723
PCT_DYNMULTI_0_6_H40F_87_0088	538.698	273.289
PCT_DYNMULTI_0_6_H40F_88_0089	541.602	274.959
PCT_DYNMULTI_0_6_H40F_89_0090	543.082	275.466
PCT_DYNMULTI_0_6_H40F_90_0091	544.54	276.155
PCT_DYNMULTI_0_6_H40F_91_0092	545.168	276.406
PCT_DYNMULTI_0_6_H40F_92_0093	545.112	276.675
PCT_DYNMULTI_0_6_H40F_93_0094	543.912	275.795
PCT_DYNMULTI_0_6_H40F_94_0095	541.445	274.627
Patient Name	EXP3_10_00
Patient ID	22.11.06-14:52:37-STD-1.3.12.2.1107.5.1.4.64279
Set constrast treshold [min] [max]	399	400
Resolution [#] (px,py,slice)	512	512	64
Resolution [mm] (px,py,slice)	0.1367	0.1367	0.6
Scaled Resolution [#] (px,py,slice)	512	512	64
Scaled Resolution [mm] (px,py,slice)	0.1367	0.1367	0.6
Mask XY/Axial Plane ROI points	[213 184 100 100]	Mask XY/Axial Plane ROI slice #	45
Mask XZ/Sagittal Plane ROI points	[1 1 1 1]	Mask XZ/Sagittal Plane ROI slice #	1
Mask YZ/Coronal Plane ROI points	[1 1 1 1]	Mask YZ/Coronal Plane ROI slice #	1

## Sheet: EXP3_10_12
Order	Volume mm3	Surface mm2
PCT_DYNMULTI_0_6_H40F_1_0002	525.793	272.554
PCT_DYNMULTI_0_6_H40F_2_0003	525.053	272.338
PCT_DYNMULTI_0_6_H40F_3_0004	523.517	271.707
PCT_DYNMULTI_0_6_H40F_4_0005	520.759	270.415
PCT_DYNMULTI_0_6_H40F_5_0006	518.606	269.747
PCT_DYNMULTI_0_6_H40F_6_0007	517.496	269.18
PCT_DYNMULTI_0_6_H40F_7_0008	517.16	269.044
PCT_DYNMULTI_0_6_H40F_8_0009	517.328	269.093
PCT_DYNMULTI_0_6_H40F_9_0010	518.505	269.636
PCT_DYNMULTI_0_6_H40F_10_0011	521.241	270.94
PCT_DYNMULTI_0_6_H40F_11_0012	523.629	271.865
PCT_DYNMULTI_0_6_H40F_12_0013	525.031	272.313
PCT_DYNMULTI_0_6_H40F_13_0014	525.759	272.648
PCT_DYNMULTI_0_6_H40F_14_0015	526.051	272.613
PCT_DYNMULTI_0_6_H40F_15_0016	525.479	272.403
PCT_DYNMULTI_0_6_H40F_16_0017	523.595	271.59
PCT_DYNMULTI_0_6_H40F_17_0018	521.432	270.842
PCT_DYNMULTI_0_6_H40F_18_0019	519.694	270.236
PCT_DYNMULTI_0_6_H40F_19_0020	518.045	269.665
PCT_DYNMULTI_0_6_H40F_20_0021	517.451	269.575
PCT_DYNMULTI_0_6_H40F_21_0022	517.406	269.612
PCT_DYNMULTI_0_6_H40F_22_0023	518.427	270.051
PCT_DYNMULTI_0_6_H40F_23_0024	520.613	270.773
PCT_DYNMULTI_0_6_H40F_24_0025	522.542	271.296
PCT_DYNMULTI_0_6_H40F_25_0026	524.818	272.339
PCT_DYNMULTI_0_6_H40F_26_0027	525.995	272.79
PCT_DYNMULTI_0_6_H40F_27_0028	526.589	272.999
PCT_DYNMULTI_0_6_H40F_28_0029	526.511	273.011
PCT_DYNMULTI_0_6_H40F_29_0030	525.513	272.488
PCT_DYNMULTI_0_6_H40F_30_0031	523.517	271.789
PCT_DYNMULTI_0_6_H40F_31_0032	520.848	270.593
PCT_DYNMULTI_0_6_H40F_32_0033	518.729	269.992
PCT_DYNMULTI_0_6_H40F_33_0034	517.765	269.592
PCT_DYNMULTI_0_6_H40F_34_0035	517.339	269.475
PCT_DYNMULTI_0_6_H40F_35_0036	517.799	269.584
PCT_DYNMULTI_0_6_H40F_36_0037	519.167	269.978
PCT_DYNMULTI_0_6_H40F_37_0038	522.048	271.379
PCT_DYNMULTI_0_6_H40F_38_0039	524.167	272.048
PCT_DYNMULTI_0_6_H40F_39_0040	525.479	272.475
PCT_DYNMULTI_0_6_H40F_40_0041	526.253	272.725
PCT_DYNMULTI_0_6_H40F_41_0042	526.208	272.765
PCT_DYNMULTI_0_6_H40F_42_0043	525.244	272.466
PCT_DYNMULTI_0_6_H40F_43_0044	522.743	271.394
PCT_DYNMULTI_0_6_H40F_44_0045	520.613	270.8
PCT_DYNMULTI_0_6_H40F_45_0046	518.718	270.08
PCT_DYNMULTI_0_6_H40F_46_0047	517.361	269.451
PCT_DYNMULTI_0_6_H40F_47_0048	517.048	269.344
PCT_DYNMULTI_0_6_H40F_48_0049	517.249	269.31
PCT_DYNMULTI_0_6_H40F_49_0050	518.931	270.305
PCT_DYNMULTI_0_6_H40F_50_0051	521.42	271.026
PCT_DYNMULTI_0_6_H40F_51_0052	523.237	271.78
PCT_DYNMULTI_0_6_H40F_52_0053	525.322	272.649
PCT_DYNMULTI_0_6_H40F_53_0054	526.118	272.915
PCT_DYNMULTI_0_6_H40F_54_0055	526.421	272.82
PCT_DYNMULTI_0_6_H40F_55_0056	525.748	272.704
PCT_DYNMULTI_0_6_H40F_56_0057	524.223	272.131
PCT_DYNMULTI_0_6_H40F_57_0058	522.228	271.34
PCT_DYNMULTI_0_6_H40F_58_0059	519.884	270.46
PCT_DYNMULTI_0_6_H40F_59_0060	518.292	269.96
PCT_DYNMULTI_0_6_H40F_60_0061	517.653	269.609
PCT_DYNMULTI_0_6_H40F_61_0062	517.687	269.594
PCT_DYNMULTI_0_6_H40F_62_0063	518.685	269.973
PCT_DYNMULTI_0_6_H40F_63_0064	520.456	270.709
PCT_DYNMULTI_0_6_H40F_64_0065	523.214	271.828
PCT_DYNMULTI_0_6_H40F_65_0066	525.087	272.538
PCT_DYNMULTI_0_6_H40F_66_0067	526.017	272.947
PCT_DYNMULTI_0_6_H40F_67_0068	526.41	273.048
PCT_DYNMULTI_0_6_H40F_68_0069	526.085	272.987
PCT_DYNMULTI_0_6_H40F_69_0070	524.885	272.492
PCT_DYNMULTI_0_6_H40F_70_0071	522.474	271.535
PCT_DYNMULTI_0_6_H40F_71_0072	520.142	270.771
PCT_DYNMULTI_0_6_H40F_72_0073	518.707	270.104
PCT_DYNMULTI_0_6_H40F_73_0074	517.72	269.603
PCT_DYNMULTI_0_6_H40F_74_0075	517.653	269.558
PCT_DYNMULTI_0_6_H40F_75_0076	518.225	270.043
PCT_DYNMULTI_0_6_H40F_76_0077	520.075	270.568
PCT_DYNMULTI_0_6_H40F_77_0078	522.519	271.563
PCT_DYNMULTI_0_6_H40F_78_0079	524.268	272.132
PCT_DYNMULTI_0_6_H40F_79_0080	525.715	272.818
PCT_DYNMULTI_0_6_H40F_80_0081	526.185	273.001
PCT_DYNMULTI_0_6_H40F_81_0082	526.051	272.904
PCT_DYNMULTI_0_6_H40F_82_0083	525.12	272.602
PCT_DYNMULTI_0_6_H40F_83_0084	523.528	272.028
PCT_DYNMULTI_0_6_H40F_84_0085	521.308	271.128
PCT_DYNMULTI_0_6_H40F_85_0086	519.144	270.112
PCT_DYNMULTI_0_6_H40F_86_0087	517.989	269.804
PCT_DYNMULTI_0_6_H40F_87_0088	517.642	269.648
PCT_DYNMULTI_0_6_H40F_88_0089	518.079	269.925
PCT_DYNMULTI_0_6_H40F_89_0090	519.312	270.357
PCT_DYNMULTI_0_6_H40F_90_0091	521.185	271.201
PCT_DYNMULTI_0_6_H40F_91_0092	523.82	272.218
PCT_DYNMULTI_0_6_H40F_92_0093	525.345	272.768
PCT_DYNMULTI_0_6_H40F_93_0094	526.04	273.002
PCT_DYNMULTI_0_6_H40F_94_0095	526.006	272.873
Patient Name	EXP3_10_12
Patient ID	22.11.06-14:41:31-STD-1.3.12.2.1107.5.1.4.64279
Set constrast treshold [min] [max]	399	400
Resolution [#] (px,py,slice)	512	512	64
Resolution [mm] (px,py,slice)	0.1367	0.1367	0.6
Scaled Resolution [#] (px,py,slice)	512	512	64
Scaled Resolution [mm] (px,py,slice)	0.1367	0.1367	0.6
Mask XY/Axial Plane ROI points	[192 182 100 100]	Mask XY/Axial Plane ROI slice #	46
Mask XZ/Sagittal Plane ROI points	[1 1 1 1]	Mask XZ/Sagittal Plane ROI slice #	1
Mask YZ/Coronal Plane ROI points	[1 1 1 1]	Mask YZ/Coronal Plane ROI slice #	1

## Sheet: EXP3_10_25
Order	Volume mm3	Surface mm2
PCT_DYNMULTI_0_6_H40F_1_0002	533.137	270.464
PCT_DYNMULTI_0_6_H40F_2_0003	532.7	270.348
PCT_DYNMULTI_0_6_H40F_3_0004	532.655	270.036
PCT_DYNMULTI_0_6_H40F_4_0005	533.776	270.531
PCT_DYNMULTI_0_6_H40F_5_0006	535.11	271.084
PCT_DYNMULTI_0_6_H40F_6_0007	537.599	271.76
PCT_DYNMULTI_0_6_H40F_7_0008	539.976	272.736
PCT_DYNMULTI_0_6_H40F_8_0009	540.873	273.234
PCT_DYNMULTI_0_6_H40F_9_0010	541.098	273.394
PCT_DYNMULTI_0_6_H40F_10_0011	540.649	273.042
PCT_DYNMULTI_0_6_H40F_11_0012	539.976	272.906
PCT_DYNMULTI_0_6_H40F_12_0013	537.588	272.135
PCT_DYNMULTI_0_6_H40F_13_0014	534.852	271.075
PCT_DYNMULTI_0_6_H40F_14_0015	533.63	270.662
PCT_DYNMULTI_0_6_H40F_15_0016	532.61	270.214
PCT_DYNMULTI_0_6_H40F_16_0017	532.419	270.448
PCT_DYNMULTI_0_6_H40F_17_0018	532.756	270.396
PCT_DYNMULTI_0_6_H40F_18_0019	534.763	271.192
PCT_DYNMULTI_0_6_H40F_19_0020	537.398	272.388
PCT_DYNMULTI_0_6_H40F_20_0021	539.113	273.17
PCT_DYNMULTI_0_6_H40F_21_0022	540.234	273.664
PCT_DYNMULTI_0_6_H40F_22_0023	541.131	273.979
PCT_DYNMULTI_0_6_H40F_23_0024	541.109	273.56
PCT_DYNMULTI_0_6_H40F_24_0025	540.414	273.371
PCT_DYNMULTI_0_6_H40F_25_0026	538.463	272.677
PCT_DYNMULTI_0_6_H40F_26_0027	536.68	271.752
PCT_DYNMULTI_0_6_H40F_27_0028	534.729	271.135
PCT_DYNMULTI_0_6_H40F_28_0029	533.305	270.647
PCT_DYNMULTI_0_6_H40F_29_0030	533.092	270.783
PCT_DYNMULTI_0_6_H40F_30_0031	533.328	270.797
PCT_DYNMULTI_0_6_H40F_31_0032	534.572	271.027
PCT_DYNMULTI_0_6_H40F_32_0033	536.142	271.725
PCT_DYNMULTI_0_6_H40F_33_0034	538.485	272.752
PCT_DYNMULTI_0_6_H40F_34_0035	540.38	273.481
PCT_DYNMULTI_0_6_H40F_35_0036	540.929	273.739
PCT_DYNMULTI_0_6_H40F_36_0037	541.198	273.841
PCT_DYNMULTI_0_6_H40F_37_0038	540.772	273.629
PCT_DYNMULTI_0_6_H40F_38_0039	539.662	273.234
PCT_DYNMULTI_0_6_H40F_39_0040	537.14	272.343
PCT_DYNMULTI_0_6_H40F_40_0041	534.606	271.247
PCT_DYNMULTI_0_6_H40F_41_0042	533.608	270.759
PCT_DYNMULTI_0_6_H40F_42_0043	532.778	270.725
PCT_DYNMULTI_0_6_H40F_43_0044	532.644	270.697
PCT_DYNMULTI_0_6_H40F_44_0045	533.193	270.907
PCT_DYNMULTI_0_6_H40F_45_0046	535.85	271.678
PCT_DYNMULTI_0_6_H40F_46_0047	538.788	272.923
PCT_DYNMULTI_0_6_H40F_47_0048	540.212	273.447
PCT_DYNMULTI_0_6_H40F_48_0049	541.389	273.862
PCT_DYNMULTI_0_6_H40F_49_0050	541.849	274.156
PCT_DYNMULTI_0_6_H40F_50_0051	541.725	274.021
PCT_DYNMULTI_0_6_H40F_51_0052	540.066	273.209
PCT_DYNMULTI_0_6_H40F_52_0053	537.409	272.338
PCT_DYNMULTI_0_6_H40F_53_0054	535.828	271.82
PCT_DYNMULTI_0_6_H40F_54_0055	534.012	271.217
PCT_DYNMULTI_0_6_H40F_55_0056	532.935	270.626
PCT_DYNMULTI_0_6_H40F_56_0057	532.834	270.626
PCT_DYNMULTI_0_6_H40F_57_0058	533.35	270.797
PCT_DYNMULTI_0_6_H40F_58_0059	535.211	271.444
PCT_DYNMULTI_0_6_H40F_59_0060	537.084	272.094
PCT_DYNMULTI_0_6_H40F_60_0061	539.371	273.092
PCT_DYNMULTI_0_6_H40F_61_0062	541.075	273.839
PCT_DYNMULTI_0_6_H40F_62_0063	541.479	273.986
PCT_DYNMULTI_0_6_H40F_63_0064	541.468	273.876
PCT_DYNMULTI_0_6_H40F_64_0065	540.593	273.438
PCT_DYNMULTI_0_6_H40F_65_0066	539.18	273.12
PCT_DYNMULTI_0_6_H40F_66_0067	536.658	272.229
PCT_DYNMULTI_0_6_H40F_67_0068	534.168	271.374
PCT_DYNMULTI_0_6_H40F_68_0069	533.384	270.986
PCT_DYNMULTI_0_6_H40F_69_0070	533.014	270.874
PCT_DYNMULTI_0_6_H40F_70_0071	533.148	270.904
PCT_DYNMULTI_0_6_H40F_71_0072	534.18	271.445
PCT_DYNMULTI_0_6_H40F_72_0073	536.77	272.35
PCT_DYNMULTI_0_6_H40F_73_0074	539.304	273.266
PCT_DYNMULTI_0_6_H40F_74_0075	540.559	273.703
PCT_DYNMULTI_0_6_H40F_75_0076	541.255	273.948
PCT_DYNMULTI_0_6_H40F_76_0077	541.524	274.1
PCT_DYNMULTI_0_6_H40F_77_0078	541.098	274.035
PCT_DYNMULTI_0_6_H40F_78_0079	539.068	272.957
PCT_DYNMULTI_0_6_H40F_79_0080	536.4	272.078
PCT_DYNMULTI_0_6_H40F_80_0081	535.178	271.752
PCT_DYNMULTI_0_6_H40F_81_0082	533.608	271.117
PCT_DYNMULTI_0_6_H40F_82_0083	532.879	270.76
PCT_DYNMULTI_0_6_H40F_83_0084	532.801	270.782
PCT_DYNMULTI_0_6_H40F_84_0085	533.877	271.107
PCT_DYNMULTI_0_6_H40F_85_0086	536.187	271.971
PCT_DYNMULTI_0_6_H40F_86_0087	537.611	272.33
PCT_DYNMULTI_0_6_H40F_87_0088	539.887	273.401
PCT_DYNMULTI_0_6_H40F_88_0089	541.165	274.053
PCT_DYNMULTI_0_6_H40F_89_0090	541.198	274.047
PCT_DYNMULTI_0_6_H40F_90_0091	540.918	273.962
PCT_DYNMULTI_0_6_H40F_91_0092	539.707	273.386
PCT_DYNMULTI_0_6_H40F_92_0093	538.317	272.8
PCT_DYNMULTI_0_6_H40F_93_0094	535.626	271.748
PCT_DYNMULTI_0_6_H40F_94_0095	533.63	270.905
Patient Name	EXP3_10_25
Patient ID	22.11.06-14:28:19-STD-1.3.12.2.1107.5.1.4.64279
Set constrast treshold [min] [max]	399	400
Resolution [#] (px,py,slice)	512	512	64
Resolution [mm] (px,py,slice)	0.1367	0.1367	0.6
Scaled Resolution [#] (px,py,slice)	512	512	64
Scaled Resolution [mm] (px,py,slice)	0.1367	0.1367	0.6
Mask XY/Axial Plane ROI points	[192 184 100 100]	Mask XY/Axial Plane ROI slice #	46
Mask XZ/Sagittal Plane ROI points	[1 1 1 1]	Mask XZ/Sagittal Plane ROI slice #	1
Mask YZ/Coronal Plane ROI points	[1 1 1 1]	Mask YZ/Coronal Plane ROI slice #	1

## Sheet: EXP3_10_50
Order	Volume mm3	Surface mm2
PCT_DYNMULTI_0_6_H40F_1_0002	515.433	259.84
PCT_DYNMULTI_0_6_H40F_2_0003	513.146	259.107
PCT_DYNMULTI_0_6_H40F_3_0004	510.623	258.186
PCT_DYNMULTI_0_6_H40F_4_0005	509.636	258.059
PCT_DYNMULTI_0_6_H40F_5_0006	508.515	257.67
PCT_DYNMULTI_0_6_H40F_6_0007	508.313	257.592
PCT_DYNMULTI_0_6_H40F_7_0008	508.594	257.686
PCT_DYNMULTI_0_6_H40F_8_0009	509.917	258.011
PCT_DYNMULTI_0_6_H40F_9_0010	512.451	258.903
PCT_DYNMULTI_0_6_H40F_10_0011	513.762	259.278
PCT_DYNMULTI_0_6_H40F_11_0012	515.444	259.794
PCT_DYNMULTI_0_6_H40F_12_0013	516.151	259.946
PCT_DYNMULTI_0_6_H40F_13_0014	516.038	259.874
PCT_DYNMULTI_0_6_H40F_14_0015	515.377	259.754
PCT_DYNMULTI_0_6_H40F_15_0016	513.762	259.235
PCT_DYNMULTI_0_6_H40F_16_0017	512.26	258.828
PCT_DYNMULTI_0_6_H40F_17_0018	510.32	258.22
PCT_DYNMULTI_0_6_H40F_18_0019	509.008	257.909
PCT_DYNMULTI_0_6_H40F_19_0020	508.739	257.91
PCT_DYNMULTI_0_6_H40F_20_0021	508.874	257.829
PCT_DYNMULTI_0_6_H40F_21_0022	509.805	258.094
PCT_DYNMULTI_0_6_H40F_22_0023	510.993	258.527
PCT_DYNMULTI_0_6_H40F_23_0024	513.359	259.145
PCT_DYNMULTI_0_6_H40F_24_0025	515.332	259.677
PCT_DYNMULTI_0_6_H40F_25_0026	515.859	259.794
PCT_DYNMULTI_0_6_H40F_26_0027	516.128	259.825
PCT_DYNMULTI_0_6_H40F_27_0028	515.881	259.77
PCT_DYNMULTI_0_6_H40F_28_0029	515.153	259.523
PCT_DYNMULTI_0_6_H40F_29_0030	512.551	258.947
PCT_DYNMULTI_0_6_H40F_30_0031	510.432	258.412
PCT_DYNMULTI_0_6_H40F_31_0032	509.446	258.003
PCT_DYNMULTI_0_6_H40F_32_0033	508.638	257.726
PCT_DYNMULTI_0_6_H40F_33_0034	508.369	257.706
PCT_DYNMULTI_0_6_H40F_34_0035	508.784	257.804
PCT_DYNMULTI_0_6_H40F_35_0036	510.657	258.5
PCT_DYNMULTI_0_6_H40F_36_0037	513.303	259.151
PCT_DYNMULTI_0_6_H40F_37_0038	514.312	259.385
PCT_DYNMULTI_0_6_H40F_38_0039	515.803	259.778
PCT_DYNMULTI_0_6_H40F_39_0040	516.184	259.966
PCT_DYNMULTI_0_6_H40F_40_0041	516.207	260.022
PCT_DYNMULTI_0_6_H40F_41_0042	514.94	259.539
PCT_DYNMULTI_0_6_H40F_42_0043	512.91	259.05
PCT_DYNMULTI_0_6_H40F_43_0044	511.61	258.683
PCT_DYNMULTI_0_6_H40F_44_0045	509.715	258.155
PCT_DYNMULTI_0_6_H40F_45_0046	508.661	257.766
PCT_DYNMULTI_0_6_H40F_46_0047	508.504	257.704
PCT_DYNMULTI_0_6_H40F_47_0048	508.851	257.831
PCT_DYNMULTI_0_6_H40F_48_0049	510.343	258.326
PCT_DYNMULTI_0_6_H40F_49_0050	511.598	258.769
PCT_DYNMULTI_0_6_H40F_50_0051	514.121	259.353
PCT_DYNMULTI_0_6_H40F_51_0052	516.038	259.833
PCT_DYNMULTI_0_6_H40F_52_0053	516.476	259.955
PCT_DYNMULTI_0_6_H40F_53_0054	516.633	260.039
PCT_DYNMULTI_0_6_H40F_54_0055	516.072	260
PCT_DYNMULTI_0_6_H40F_55_0056	515.119	259.699
PCT_DYNMULTI_0_6_H40F_56_0057	512.518	258.812
PCT_DYNMULTI_0_6_H40F_57_0058	510.309	258.275
PCT_DYNMULTI_0_6_H40F_58_0059	509.401	257.895
PCT_DYNMULTI_0_6_H40F_59_0060	508.807	257.701
PCT_DYNMULTI_0_6_H40F_60_0061	508.728	257.668
PCT_DYNMULTI_0_6_H40F_61_0062	509.188	257.788
PCT_DYNMULTI_0_6_H40F_62_0063	511.486	258.836
PCT_DYNMULTI_0_6_H40F_63_0064	513.785	259.269
PCT_DYNMULTI_0_6_H40F_64_0065	514.715	259.385
PCT_DYNMULTI_0_6_H40F_65_0066	515.994	259.909
PCT_DYNMULTI_0_6_H40F_66_0067	516.251	259.878
PCT_DYNMULTI_0_6_H40F_67_0068	516.229	259.856
PCT_DYNMULTI_0_6_H40F_68_0069	514.648	259.416
PCT_DYNMULTI_0_6_H40F_69_0070	512.473	258.859
PCT_DYNMULTI_0_6_H40F_70_0071	511.184	258.695
PCT_DYNMULTI_0_6_H40F_71_0072	509.446	258.135
PCT_DYNMULTI_0_6_H40F_72_0073	508.695	257.743
PCT_DYNMULTI_0_6_H40F_73_0074	508.594	257.799
PCT_DYNMULTI_0_6_H40F_74_0075	509.076	258.096
PCT_DYNMULTI_0_6_H40F_75_0076	510.802	258.52
PCT_DYNMULTI_0_6_H40F_76_0077	512.025	258.714
PCT_DYNMULTI_0_6_H40F_77_0078	514.469	259.397
PCT_DYNMULTI_0_6_H40F_78_0079	515.87	259.799
PCT_DYNMULTI_0_6_H40F_79_0080	516.128	259.927
PCT_DYNMULTI_0_6_H40F_80_0081	516.207	260.009
PCT_DYNMULTI_0_6_H40F_81_0082	515.332	259.714
PCT_DYNMULTI_0_6_H40F_82_0083	514.39	259.685
PCT_DYNMULTI_0_6_H40F_83_0084	511.542	258.653
PCT_DYNMULTI_0_6_H40F_84_0085	509.648	258.204
PCT_DYNMULTI_0_6_H40F_85_0086	509.098	258.107
PCT_DYNMULTI_0_6_H40F_86_0087	508.616	257.802
PCT_DYNMULTI_0_6_H40F_87_0088	508.627	257.77
PCT_DYNMULTI_0_6_H40F_88_0089	509.58	258.103
PCT_DYNMULTI_0_6_H40F_89_0090	512.316	259.019
PCT_DYNMULTI_0_6_H40F_90_0091	514.828	259.717
PCT_DYNMULTI_0_6_H40F_91_0092	515.612	259.917
PCT_DYNMULTI_0_6_H40F_92_0093	516.7	260.16
PCT_DYNMULTI_0_6_H40F_93_0094	516.812	260.134
PCT_DYNMULTI_0_6_H40F_94_0095	516.431	260.026
Patient Name	EXP3_10_50
Patient ID	22.11.06-14:16:45-STD-1.3.12.2.1107.5.1.4.64279
Set constrast treshold [min] [max]	399	400
Resolution [#] (px,py,slice)	512	512	128
Resolution [mm] (px,py,slice)	0.1367	0.1367	0.6
Scaled Resolution [#] (px,py,slice)	512	512	128
Scaled Resolution [mm] (px,py,slice)	0.1367	0.1367	0.6
Mask XY/Axial Plane ROI points	[186 189 100 100]	Mask XY/Axial Plane ROI slice #	84
Mask XZ/Sagittal Plane ROI points	[1 1 1 1]	Mask XZ/Sagittal Plane ROI slice #	1
Mask YZ/Coronal Plane ROI points	[1 1 1 1]	Mask YZ/Coronal Plane ROI slice #	1

[truncated: 16 more sheets: EXP3_10_70, EXP3_15_00, EXP3_15_12, EXP3_15_25, EXP3_15_50, EXP3_15_70, EXP3_20_00, EXP3_20_12, EXP3_20_25, EXP3_20_50, EXP3_20_70, EXP3_25_00, EXP3_25_12, EXP3_25_25, EXP3_25_50, EXP3_25_70]
